# Supplementary material for: Epigenetic drift score captures directional methylation variability and links aging to transcriptional, metabolic, and genetic alterations
Source: HighWire-hosted journal article supplement (doi:10.1101/gr.280155.124), 2025-08-01
Supplement: Supplemental_Table_S1.xlsx [file Supplemental_Table_S1.xlsx]

## Sheet: Supplemental_Table_S1
	Supplemental Table S1. Characteristics of the study populations.
		NSPT	CAS	Changfeng baseline	Changfeng follow-up
	Technology	850K	850K	850K	850K
	Tissue	Whole blood	Whole blood	Whole blood	Whole blood
	Ancestry	East Asian	East Asian	East Asian	East Asian
	N	3538	1060	407	407
	Male(%)	1308(37.0)	639(59.7)	235(57.7)	235(57.7)
	Mean age	50.2 (12.7) *	40.8 (9.4) *	61.37(7.38)*	65.47(7.34)*
	Age	18-83	22-64	48-80	52-84
	<20	11(0.3%)	0	0	0
	20–30	312(8.8%)	134(12.5%)	0	0
	30–40	374(10.6%)	367(34.3%)	0	0
	40–50	789(22.3%)	359(33.6%)	23(5.7%)	0
	50–60	1122(31.7%)	192(17.9%)	157(38.6%)	114(28.0%)
	60–70	812(23.0%)	18(1.7%)	174(42.8%)	176(43.2%)
	>70	118(3.3%)	0	53(13.0%)	117(28.7%)
	* Mean(Standard deviation)
