# Supplementary material for: Epigenetic drift score captures directional methylation variability and links aging to transcriptional, metabolic, and genetic alterations
Source: HighWire-hosted journal article supplement (doi:10.1101/gr.280155.124), 2025-08-01
Supplement: Supplemental_Table_S2.xlsx [file Supplemental_Table_S2.xlsx]

## Sheet: Supplemental_Table_S2
	Supplemental Table S2. Epigenetic clock effect of drift-CpGs.
			Drift
			Positive	Negative	Non	Sum
		Positive	19726	216	27008	46950
		Negative	13884	292	85371	99547
	Clock	Non	16267	0	306297	322564
		Sum	49877	508	418676	469061
