# Supplementary material for: Epigenetic drift score captures directional methylation variability and links aging to transcriptional, metabolic, and genetic alterations
Source: HighWire-hosted journal article supplement (doi:10.1101/gr.280155.124), 2025-08-01
Supplement: Supplemental_Table_S3.xlsx [file Supplemental_Table_S3.xlsx]

## Sheet: Supplemental_Table_S3
	Supplemental Table S3. DNA methylation drift-CpGs discovered in NSPT and repicated in CAS.
	CpG	Chr	Mbp	CpG closest gene	Type	whiteP.NSPT	whiteP.CAS
	cg13108341	chr17	11608711	DNAH9	negative	1.45983e-121	0.00271073
	cg01877366	chr8	141301482	TRAPPC9	negative	2.65439e-77	6.598e-05
	cg05293861	chr12	4262708	CCND2	negative	3.06256e-66	0.00351745
	cg05150188	chr6	133008700	VNN1	positive	7.99985e-60	0.00252786
	cg13868026	chr14	100541686	EVL	negative	6.75723e-59	8.84809e-07
	cg16593554	chr18	74813401	MBP	negative	1.33152e-53	0.00941332
	cg16458838	chr15	57250375	TCF12	negative	1.81817e-53	0.0173016
	cg12221970	chr1	226884832	ITPKB	negative	7.65211e-53	0.0314593
	cg18524319	chr7	40027253	CDK13	negative	1.83497e-49	0.0140671
	cg04278580	chr7	155538094	RBM33	negative	5.10756e-46	0.00203724
	cg21012238	chr22	40341342	GRAP2	negative	1.33506e-44	0.00800219
	cg08578568	chr16	86492943	FENDRR	positive	2.09347e-44	0.00342174
	cg12484135	chr3	10270544	IRAK2	negative	3.48132e-43	0.00156336
	cg03230469	chr5	37837704	GDNF	positive	3.59582e-43	0.000688054
	cg03437341	chr16	19959762	GPRC5B	positive	2.72958e-41	0.00243898
	cg19299094	chr4	25658035	SLC34A2	positive	1.50491e-40	7.7537e-06
	cg17826980	chr1	176771674	PAPPA2	positive	2.36239e-40	0.00353128
	cg07552569	chr1	2398204	PLCH2	positive	3.34793e-40	0.000812765
	cg03803861	chr5	41511150	PLCXD3	positive	4.25137e-40	0.000833625
	cg16202096	chr11	12713349	TEAD1	positive	2.27379e-39	0.014104
	cg16379910	chr14	78636730	NRXN3	positive	2.48883e-39	0.0063753
	cg06769116	chr1	244217538	ZBTB18	negative	2.79263e-39	0.0269468
	cg17365729	chr7	98169590	NPTX2	positive	4.79262e-39	5.98732e-05
	cg04602747	chr6	118273169	SLC35F1	positive	7.04345e-39	0.000752259
	cg16224755	chr8	42410144	SMIM19	positive	1.92071e-38	0.00381992
	cg14319628	chr7	140931519	TMEM178B	positive	2.33269e-38	0.00670856
	cg13692526	chr1	22470499	WNT4	positive	4.63395e-38	0.000235763
	cg11724393	chr22	39550015	CBX7	positive	7.9885e-38	0.0392921
	cg09210964	chr12	54351994	HOXC12	positive	9.54126e-38	0.000819523
	cg15331832	chr4	7085882	LINC02447	positive	1.50405e-37	0.000921168
	cg11311332	chr7	131433049	PODXL	positive	1.77684e-37	0.00239288
	cg00027669	chr17	37382699	STAC2	positive	1.82199e-37	0.0110353
	cg10886633	chr15	86583871	AGBL1	positive	2.07094e-37	0.00817653
	cg01631226	chr22	48792702	TAFA5	positive	3.84729e-37	6.28763e-07
	cg11933211	chr9	133027040	NCS1	positive	4.28371e-37	0.00361721
	cg04909099	chr20	48094875	KCNB1	positive	4.31742e-37	0.0120556
	cg00558554	chr17	61600153	KCNH6	positive	4.73418e-37	0.0169904
	cg08904591	chr15	96855873	NR2F2-AS1	positive	5.86016e-37	0.0158937
	cg20339868	chr2	7913670	LINC00298	negative	6.68716e-37	0.0417705
	cg22168676	chr6	10060780	TFAP2A	positive	1.99179e-36	0.031754
	cg03335213	chr20	45617908	EYA2	positive	2.6899e-36	0.00425299
	cg12394821	chr6	20069768	MBOAT1	positive	2.7311e-36	0.00863151
	cg03961481	chr16	51180521	SALL1	positive	2.97039e-36	0.00360211
	cg14343580	chr18	30427899	KLHL14	positive	3.15159e-36	0.0106527
	cg12300731	chr11	101207708	TRPC6	positive	3.77967e-36	2.18255e-05
	cg16457351	chr5	176297315	UNC5A	positive	4.06358e-36	5.38651e-05
	cg20007836	chr17	37844870	ERBB2	positive	5.4849e-36	0.000662352
	cg20416831	chr2	137521943	THSD7B	positive	7.01757e-36	0.027833
	cg26653990	chr5	72510846	TMEM174	positive	8.01608e-36	0.0292117
	cg12065529	chr13	45875680	GTF2F2	positive	8.79552e-36	7.68521e-05
	cg25364822	chr1	33337257	FNDC5	positive	1.09148e-35	2.71936e-05
	cg18250881	chr21	28962830	LINC00113	positive	1.12316e-35	6.62214e-05
	cg06911020	chr3	39851123	MYRIP	positive	1.20112e-35	0.00153539
	cg12369481	chr3	18459998	SATB1	negative	1.53776e-35	0.0450679
	cg00151680	chr10	26720032	APBB1IP	negative	1.54098e-35	0.000100508
	cg00980625	chr18	56889548	GRP	positive	1.61496e-35	0.00707851
	cg27083740	chr16	6071073	RBFOX1	positive	1.66275e-35	3.1895e-07
	cg06216327	chr2	218088459	DIRC3	negative	1.86526e-35	0.0169439
	cg20939114	chr17	65471507	PITPNC1	positive	1.99413e-35	0.0221195
	cg16398875	chr14	90660524	KCNK13	positive	2.55879e-35	0.00296981
	cg05340269	chr11	79032619	TENM4	positive	4.44757e-35	0.015427
	cg13672791	chr19	54416165	CACNG7	positive	4.47793e-35	0.000302778
	cg16326188	chr4	87464932	MAPK10	positive	8.91617e-35	2.50785e-05
	cg04265261	chr9	133815865	FIBCD1	positive	1.01721e-34	0.00918272
	cg02734000	chr20	31821287	BPIFA1	positive	1.32615e-34	2.34584e-05
	cg18083591	chr1	37238410	GRIK3	positive	1.45264e-34	0.00140372
	cg25539515	chr20	53611750	DOK5	positive	1.56022e-34	0.0322873
	cg13066289	chr2	134135267	NCKAP5	positive	1.6022e-34	5.75793e-06
	cg08276289	chr3	28617854	LINC00693	positive	2.72574e-34	0.00885336
	cg10743727	chr19	57494662	MIMT1	positive	2.9266e-34	1.47113e-05
	cg27520905	chr7	153999655	DPP6	positive	3.52376e-34	0.00572398
	cg14548509	chr8	41165144	SFRP1	positive	3.55606e-34	0.000668343
	cg00668303	chr1	214152709	PROX1	positive	3.56513e-34	0.0145415
	cg27595512	chr8	20162045	LZTS1-AS1	positive	4.92727e-34	0.000330742
	cg04221683	chr17	3576856	P2RX5-TAX1BP3	positive	4.95075e-34	0.00526373
	cg20993253	chr15	100535343	ADAMTS17	positive	5.10467e-34	0.0345448
	cg08354106	chr4	7961982	ABLIM2	positive	5.18323e-34	0.000904237
	cg10859114	chr14	99732195	BCL11B	positive	5.54071e-34	0.019982
	cg26040939	chr14	71068188	MED6	positive	5.88771e-34	0.0107543
	cg16079130	chr1	37790782	ZC3H12A-DT	positive	6.28189e-34	0.000172077
	cg05406923	chr6	99090481	POU3F2	positive	6.4665e-34	0.00153554
	cg23375252	chr20	14123131	MACROD2	positive	7.32229e-34	0.0239652
	cg13336214	chr11	31847101	PAX6-AS1	positive	7.79251e-34	0.0109883
	cg12176193	chr6	118150893	SLC35F1	positive	8.5838e-34	0.00524729
	cg00038038	chr1	176522318	PAPPA2	positive	8.78258e-34	0.000303094
	cg17847881	chr1	37506594	GRIK3	positive	9.19438e-34	0.000415443
	cg03344654	chr16	23360038	SCNN1B	positive	9.89092e-34	0.000351602
	cg03613178	chr10	102417364	PAX2	positive	1.01563e-33	0.00676355
	cg00844202	chr14	29706070	MIR548AI	positive	1.20699e-33	0.000204658
	cg00256932	chr22	51041732	MAPK8IP2	positive	1.51014e-33	0.00193089
	cg17646797	chr1	241970344	WDR64	negative	1.59941e-33	0.026475
	cg07897858	chr20	34973209	DLGAP4	positive	1.73827e-33	0.017086
	cg08794954	chr11	79124571	TENM4	positive	1.74171e-33	0.00488334
	cg13249925	chr9	101470346	GABBR2	positive	2.04432e-33	0.000668626
	cg22957659	chr5	176289543	UNC5A	positive	2.16603e-33	0.000314635
	cg12003258	chr2	220493130	SLC4A3	positive	2.22995e-33	1.36733e-06
	cg19435774	chr11	88798315	GRM5	positive	2.35006e-33	0.0378192
	cg10972552	chr20	40490942	PTPRT	positive	2.57139e-33	0.0491997
	cg25198661	chr11	78884803	TENM4	positive	2.60356e-33	0.00729799
	cg10068568	chr12	1113120	ERC1	negative	2.62423e-33	0.0285288
	cg22443057	chr8	27058657	STMN4	positive	2.85454e-33	0.00375859
	cg19805274	chr1	18688684	IGSF21	positive	2.91596e-33	2.47969e-07
	cg17497397	chr4	8087794	ABLIM2	positive	3.46212e-33	0.000439423
	cg10852895	chr15	100520897	ADAMTS17	positive	3.48298e-33	1.30782e-05
	cg25855753	chr22	46451281	PRR34-AS1	positive	3.51247e-33	0.0156405
	cg05531255	chr3	167967782	EGFEM1P	positive	3.77544e-33	0.000378742
	cg03477379	chr19	18020327	SLC5A5	positive	3.77726e-33	0.00031425
	cg27316107	chr12	28126973	PTHLH	positive	3.97396e-33	0.000249538
	cg22976218	chr2	182544321	CERKL	positive	4.94882e-33	0.0318354
	cg03117233	chr8	24526643	ADAM7	positive	5.20213e-33	0.0261572
	cg01980311	chr3	130235479	COL6A5	positive	5.56887e-33	0.00975364
	cg10294474	chr16	49090004	CBLN1	positive	5.72567e-33	0.000342974
	cg01336268	chr14	79303370	NRXN3	positive	5.84655e-33	0.00284674
	cg03658578	chr3	170304031	CLDN11	positive	6.73838e-33	0.0183049
	cg12098991	chr4	8107221	ABLIM2	positive	7.07771e-33	1.79511e-05
	cg22226821	chr1	240587072	FMN2	positive	7.16284e-33	0.00418198
	cg23378460	chr9	19720545	SLC24A2	positive	7.87538e-33	0.00476282
	cg06822995	chr5	110559431	CAMK4	positive	8.16978e-33	4.83079e-05
	cg06020537	chr10	125318917	GPR26	positive	8.35511e-33	0.000746305
	cg17105597	chr15	73662918	HCN4	positive	8.46358e-33	0.00136661
	cg20276677	chr7	34697855	NPSR1-AS1	positive	8.4967e-33	7.2724e-06
	cg25210850	chr2	77749513	LRRTM4	positive	9.0932e-33	0.0177432
	cg14118991	chr17	26740915	SLC46A1	positive	9.5229e-33	0.0039681
	cg10027842	chr1	182650848	RGS8	positive	9.53762e-33	0.00607019
	cg13623434	chr4	153088123	FBXW7	positive	9.96507e-33	2.67688e-07
	cg12053462	chr1	91170011	BARHL2	positive	1.0222e-32	0.000246991
	cg19342722	chr5	141126833	ARAP3	positive	1.03438e-32	0.00480676
	cg13368756	chr5	11904127	CTNND2	positive	1.19037e-32	0.0147029
	cg24785473	chr3	35681883	ARPP21	positive	1.2126e-32	0.0471708
	cg11321092	chr5	144325284	KCTD16	positive	1.22564e-32	1.09714e-06
	cg18803147	chr5	2743124	IRX2	positive	1.49915e-32	7.22888e-05
	cg21186299	chr7	100808810	VGF	positive	1.66793e-32	0.0260073
	cg15062059	chr3	137492929	SOX14	positive	1.76227e-32	0.000215337
	cg08386537	chr2	171569381	LINC01124	positive	1.84736e-32	0.000767649
	cg20367712	chr4	54967809	GSX2	positive	2.27566e-32	0.0104349
	cg10927093	chr1	181616634	CACNA1E	positive	2.54702e-32	0.0190613
	cg01149317	chr15	86987924	AGBL1	positive	2.99044e-32	0.00453025
	cg02735486	chr4	113970935	ANK2	positive	3.12482e-32	1.57723e-09
	cg06614221	chr15	96846163	NR2F2-AS1	positive	3.28123e-32	4.87462e-05
	cg04166544	chr2	230580574	DNER	positive	3.35537e-32	0.000771738
	cg26264769	chr6	27521330	ZNF184	positive	3.65229e-32	0.000922577
	cg19730248	chr1	197873880	C1orf53	positive	3.65898e-32	0.000247002
	cg17564844	chr22	23413784	RSPH14	positive	3.6594e-32	0.0277406
	cg15609186	chr4	67772211	CENPC	positive	3.71474e-32	0.0340347
	cg07601542	chr21	34396986	OLIG2	positive	3.98599e-32	0.016716
	cg01923037	chr11	69707384	FGF3	positive	3.99791e-32	0.00422377
	cg24906161	chr4	6197996	JAKMIP1	positive	4.05791e-32	9.78971e-06
	cg14864853	chr5	63801847	RGS7BP	positive	4.1816e-32	0.00657302
	cg10653240	chr1	51810892	TTC39A	positive	4.45832e-32	0.000353358
	cg01840855	chr16	86356205	LINC00917	positive	4.46235e-32	1.24082e-05
	cg27132535	chr8	20170388	LZTS1-AS1	positive	4.53399e-32	2.59411e-05
	cg15297611	chr17	77302507	RBFOX3	positive	5.33881e-32	0.0202287
	cg16118070	chr16	51184697	SALL1	positive	5.51874e-32	0.000679733
	cg11012749	chr4	24479782	PPARGC1A	positive	5.59263e-32	0.00419259
	cg25564749	chr19	29888981	VSTM2B-DT	positive	5.88984e-32	0.00844901
	cg04639347	chr17	5697514	LOC339166	positive	6.02342e-32	0.0350122
	cg19670431	chr4	7436874	SORCS2	positive	6.12771e-32	0.00780858
	cg27256213	chr19	30031009	VSTM2B	positive	6.29509e-32	0.0104915
	cg14434755	chr12	115107540	TBX3	positive	6.9658e-32	0.0206922
	cg23047693	chr12	57608606	LRP1	positive	8.3628e-32	0.00043714
	cg10332039	chr11	1848665	SYT8	positive	8.61529e-32	2.0333e-05
	cg15078271	chr17	73472441	TMEM94	positive	9.37353e-32	0.000103687
	cg17092985	chr8	20119213	LZTS1	positive	1.01044e-31	0.00373788
	cg01953482	chr5	176107734	TSPAN17	positive	1.09072e-31	0.00234366
	cg09717927	chr13	112630399	SOX1	positive	1.11047e-31	0.0173585
	cg13716776	chr6	111852105	TRAF3IP2-AS1	negative	1.11554e-31	0.000570143
	cg21006686	chr12	117800240	NOS1	positive	1.12676e-31	8.74565e-06
	cg01704580	chr22	35934952	RASD2	positive	1.16348e-31	0.000506807
	cg04083416	chr12	7167857	C1S	positive	1.19034e-31	3.27539e-07
	cg11255687	chr9	114784484	MIR3134	positive	1.21979e-31	0.0151592
	cg11401385	chr19	17445012	ANO8	positive	1.25836e-31	0.0104264
	cg06753901	chr2	226265132	NYAP2	positive	1.28331e-31	3.04014e-07
	cg07832143	chr17	77435199	RBFOX3	positive	1.48011e-31	0.000419009
	cg24334434	chr3	196594316	SENP5	positive	1.48553e-31	0.000665326
	cg24917057	chr17	27333769	SEZ6	positive	1.52495e-31	0.0184895
	cg09116081	chr7	96643160	DLX6-AS1	positive	1.54291e-31	0.000752001
	cg07709606	chr2	17699243	RAD51AP2	positive	1.59781e-31	0.0135823
	cg20699323	chr8	133071588	OC90	positive	1.62154e-31	0.00676329
	cg07554924	chr9	75060151	TMC1	positive	1.7643e-31	0.000156021
	cg04108360	chr11	67771791	UNC93B1	positive	1.8627e-31	0.00991118
	cg17100154	chr12	6807623	PIANP	positive	1.93586e-31	0.000108261
	cg19422197	chr17	77402860	RBFOX3	positive	2.06469e-31	1.66949e-05
	cg19467890	chr1	37351932	GRIK3	positive	2.43551e-31	0.029439
	cg24913794	chr2	126716943	GYPC	positive	2.45325e-31	2.49854e-07
	cg19470812	chr14	99613263	BCL11B	positive	2.5479e-31	0.00786728
	cg03261155	chr1	153413940	S100A7L2	positive	2.66685e-31	2.13494e-07
	cg09506037	chr2	134180560	NCKAP5	positive	2.82866e-31	0.0017738
	cg05282036	chr16	7455377	RBFOX1	positive	3.82543e-31	0.0206926
	cg18756476	chr1	232384424	SIPA1L2	positive	3.97287e-31	0.00732042
	cg04628938	chr17	58824885	BCAS3	positive	4.01858e-31	0.00808891
	cg02950812	chr11	114831271	CADM1	positive	4.35291e-31	0.00200145
	cg12024787	chr16	24360304	CACNG3	positive	4.61987e-31	6.1448e-06
	cg01706824	chr15	89336004	ACAN	positive	5.01621e-31	0.00234508
	cg04021514	chr19	54406516	PRKCG	positive	5.19082e-31	0.00648919
	cg10312464	chr12	49387691	DDN	positive	5.2942e-31	0.0154951
	cg01907347	chr20	36298468	LOC100287792	positive	6.25481e-31	0.000492536
	cg09845941	chr1	18621725	IGSF21	positive	6.34798e-31	0.00656589
	cg21684564	chr17	45909778	LRRC46	positive	6.57879e-31	0.00471097
	cg01066636	chr19	36415167	LRFN3	positive	6.71368e-31	0.00105877
	cg19328475	chr5	122430277	PRDM6	positive	6.86915e-31	0.021879
	cg01349933	chr14	72398252	RGS6	positive	7.59231e-31	0.00178153
	cg17985646	chr7	35293759	TBX20	positive	7.74941e-31	0.000127239
	cg00133847	chr9	26893343	CAAP1	positive	8.04085e-31	0.000363877
	cg01958723	chr20	34893781	DLGAP4	positive	8.06105e-31	0.02383
	cg09752271	chr11	125658038	PATE3	positive	9.30142e-31	0.00590327
	cg23273843	chr13	111449880	PRECSIT	positive	9.5235e-31	0.00058272
	cg16532606	chr17	46036419	PRR15L	positive	9.8897e-31	0.021959
	cg02932854	chr7	75444115	CCL24	positive	1.08226e-30	0.00529839
	cg18447645	chr7	155303298	CNPY1	positive	1.19284e-30	0.00128425
	cg09583532	chr2	177015999	HOXD4	positive	1.24127e-30	0.00671962
	cg25745121	chr19	10138292	RDH8	positive	1.24954e-30	4.58979e-05
	cg16362074	chr19	29492214	LINC01532	positive	1.26033e-30	0.000690025
	cg22158769	chr2	39187539	ARHGEF33	positive	1.26598e-30	0.00168932
	cg11060943	chr11	45778063	LINC02716	positive	1.2796e-30	3.18728e-10
	cg15870857	chr14	104742172	KIF26A	positive	1.4027e-30	0.000158964
	cg06197836	chr1	39283522	RRAGC	positive	1.44526e-30	0.00108717
	cg04052235	chr11	122870002	BSX	positive	1.44917e-30	0.0178132
	cg03689092	chr2	128439345	LIMS2	positive	1.51403e-30	0.0021434
	cg14859722	chr16	29909250	SLX1B-SULT1A4	positive	1.516e-30	0.0395603
	cg24002513	chr4	1106144	RNF212	positive	1.55346e-30	0.000233237
	cg02705835	chr3	49203908	CCDC71	positive	1.58244e-30	0.00846096
	cg23443913	chr4	85301643	NKX6-1	positive	1.82821e-30	0.018505
	cg09913287	chr1	37722449	MIR4255	positive	1.86484e-30	0.00307593
	cg14638091	chr17	46225864	SKAP1	positive	1.92763e-30	0.00308784
	cg27549480	chr9	134953928	MED27	positive	1.93646e-30	0.0467774
	cg11804622	chr15	96860667	NR2F2-AS1	positive	1.94176e-30	0.0284612
	cg02661829	chr11	63802404	MACROD1	positive	1.96151e-30	0.000118952
	cg13588354	chr20	54823303	MC3R	positive	2.09188e-30	0.00088416
	cg15940569	chr15	27019356	GABRB3	positive	2.11798e-30	0.0249599
	cg09089053	chr19	40731797	CCNP	positive	2.11828e-30	0.000680955
	cg03431810	chr17	71903788	LINC00469	positive	2.26798e-30	0.000508514
	cg27333155	chr15	96945823	NR2F2	positive	2.36068e-30	0.00569816
	cg11796500	chr16	52490006	TOX3	positive	2.58912e-30	0.00491612
	cg10381985	chr22	48792624	TAFA5	positive	2.60964e-30	0.000120159
	cg11808936	chr4	7894203	AFAP1	positive	2.62669e-30	0.000199117
	cg21113446	chr5	146435967	PPP2R2B	positive	2.66838e-30	0.026103
	cg24889651	chr22	48074072	LINC00898	positive	2.74953e-30	0.0157211
	cg08066991	chr11	115376699	CADM1	positive	2.77486e-30	2.18501e-05
	cg19245616	chr19	18319787	PDE4C	positive	2.7973e-30	0.0110673
	cg08723608	chr7	100080506	NYAP1	positive	2.83949e-30	0.00204972
	cg24627419	chr1	156387415	MIR9-1HG	positive	3.41567e-30	3.81356e-05
	cg24462992	chr10	84502511	NRG3	positive	3.54564e-30	0.0253214
	cg09966381	chr20	60147098	CDH4	positive	3.55033e-30	1.61534e-06
	cg00822078	chr16	51805391	LINC02911	positive	3.56625e-30	0.0393661
	cg08704124	chr11	68002917	KMT5B	positive	3.65285e-30	0.00334374
	cg13105327	chr4	104346019	TACR3	positive	3.97e-30	0.0133751
	cg13081288	chr1	166941571	ILDR2	positive	4.00706e-30	0.00678468
	cg02613937	chr19	45395297	TOMM40	positive	4.86624e-30	0.000724995
	cg17819168	chr15	23807180	MIR4508	positive	5.52617e-30	0.0203007
	cg21286270	chr4	4407318	NSG1	positive	5.64037e-30	4.04748e-05
	cg21690760	chr6	9842702	TFAP2A	positive	5.72538e-30	0.0168776
	cg24891539	chr8	55370407	SOX17	positive	5.72937e-30	0.00018695
	cg08814947	chr19	51529999	KLK11	positive	5.86049e-30	2.60077e-05
	cg00534520	chr16	1386075	BAIAP3	positive	5.95399e-30	5.84275e-06
	cg20266770	chr1	107270063	PRMT6	positive	6.02045e-30	0.0155567
	cg09782097	chr5	140514711	PCDHB5	positive	6.17113e-30	7.20737e-05
	cg02589485	chr21	40084519	LINC00114	positive	6.35166e-30	0.0112372
	cg00377915	chr10	70631035	STOX1	positive	6.66729e-30	0.00838712
	cg07810881	chr13	112680598	SOX1	positive	6.73929e-30	0.02102
	cg25215292	chr5	135265753	FBXL21P	positive	7.00754e-30	7.0711e-05
	cg23013864	chr6	17393396	CAP2	positive	7.02833e-30	0.0101456
	cg03469437	chr8	14711189	SGCZ	positive	7.45928e-30	3.94429e-05
	cg02443626	chr11	44335060	ALX4	positive	7.85355e-30	0.000471604
	cg06961812	chr19	36303485	PRODH2	positive	7.95335e-30	0.0033763
	cg26501477	chr19	19321326	NCAN	positive	7.97743e-30	0.014349
	cg23692056	chr20	9512125	LAMP5	positive	8.07589e-30	2.87465e-05
	cg16980318	chr11	15716772	SOX6	positive	8.45072e-30	0.00963296
	cg02264788	chr11	114954354	CADM1	positive	8.63135e-30	8.71976e-05
	cg07436224	chr22	30115348	CABP7	positive	8.64726e-30	0.00115687
	cg08142172	chr19	39695011	SYCN	positive	8.74356e-30	0.0245556
	cg22239534	chr22	37102115	CACNG2	positive	9.5269e-30	0.000308505
	cg16146993	chr19	36927711	ZNF566	positive	9.57853e-30	0.00225181
	cg23538438	chr3	43960634	MIR138-1	positive	1.08278e-29	0.00480311
	cg00396699	chr16	1226067	CACNA1H	positive	1.1256e-29	6.79225e-05
	cg26795942	chr2	33359597	LTBP1	negative	1.16883e-29	0.0144087
	cg04176728	chr10	131810494	EBF3	positive	1.23106e-29	0.0079218
	cg07715254	chr17	40984760	PSME3	positive	1.25772e-29	0.000672538
	cg00923076	chr11	101917863	CFAP300	positive	1.259e-29	0.00824351
	cg20906903	chr15	63336270	TPM1	positive	1.28151e-29	0.00122606
	cg04448014	chr10	23459015	PTF1A	positive	1.2869e-29	0.0117122
	cg17020726	chr2	73122091	SPR	positive	1.31641e-29	1.46104e-05
	cg26755571	chr6	117528265	VGLL2	positive	1.31714e-29	0.00336976
	cg15048534	chr17	74381192	SPHK1	positive	1.32555e-29	2.52272e-05
	cg21776993	chr19	1449424	APC2	positive	1.3451e-29	0.000299325
	cg17385077	chr6	1439033	FOXF2	positive	1.35598e-29	0.00021353
	cg03265495	chr21	38034067	SIM2	positive	1.3609e-29	4.6507e-05
	cg23444418	chr13	28547617	CDX2	positive	1.39625e-29	1.23804e-05
	cg26621020	chr8	123660059	ZHX2	negative	1.41764e-29	0.0358701
	cg23736897	chr17	61600134	KCNH6	positive	1.44918e-29	2.55949e-06
	cg21038596	chr4	187867954	FAT1	positive	1.57199e-29	0.032557
	cg10642251	chr5	585802	CEP72-DT	positive	1.62926e-29	0.0150677
	cg24436446	chr13	96705594	UGGT2	positive	1.64084e-29	0.00166841
	cg12751432	chr8	56015066	XKR4	positive	1.70456e-29	0.000166221
	cg10253051	chr6	158956998	TMEM181	positive	1.71225e-29	0.0284617
	cg17834637	chr19	18340849	PDE4C	positive	1.77089e-29	0.016141
	cg07781142	chr18	73649322	LOC339298	positive	1.80105e-29	0.000797358
	cg26035802	chr16	48865450	N4BP1	positive	1.92426e-29	0.000244741
	cg08215831	chr8	67090776	CRH	positive	2.10848e-29	0.0177051
	cg20154287	chr19	1267350	CIRBP-AS1	positive	2.12248e-29	0.00589439
	cg15415259	chr6	134158982	LINC01312	positive	2.18782e-29	0.0368255
	cg04427182	chr1	5327993	NA	positive	2.30655e-29	0.000253769
	cg23633543	chr10	134901208	ADGRA1	positive	2.37694e-29	0.00438735
	cg16643109	chr9	86154016	FRMD3	positive	2.3817e-29	0.00976507
	cg00644317	chr7	27237893	HOXA13	positive	2.42924e-29	0.000282097
	cg15351009	chr5	191486	LRRC14B	positive	2.43336e-29	0.000307393
	cg12700904	chr3	13590720	FBLN2	positive	2.46944e-29	0.00132307
	cg09411409	chr5	154996395	SGCD	positive	2.53591e-29	0.000680545
	cg05781854	chr9	133831659	FIBCD1	positive	2.57981e-29	0.00385599
	cg17678183	chr9	112007207	EPB41L4B	positive	2.59266e-29	6.46789e-05
	cg00766220	chr5	72598865	TMEM174	positive	2.63501e-29	0.0242375
	cg26665873	chr6	97904124	MMS22L	positive	2.69466e-29	0.00424217
	cg03475509	chr4	85402143	NKX6-1	positive	2.83149e-29	0.00674338
	cg10965371	chr11	91247052	FAT3	positive	2.87636e-29	0.00310841
	cg24871077	chr10	106337967	SORCS3	positive	3.01791e-29	0.0274231
	cg11965976	chr5	127874463	FBN2	positive	3.06333e-29	0.000178866
	cg15652723	chr4	111560494	PITX2	positive	3.1614e-29	0.000226995
	cg10612409	chr9	101983453	ALG2	positive	3.17496e-29	0.0222452
	cg01438300	chr11	124671243	MSANTD2	positive	3.24207e-29	0.00300555
	cg26717476	chr20	45522509	EYA2	positive	3.30033e-29	1.9283e-05
	cg02105519	chr5	140306205	PCDHA13	positive	3.31831e-29	0.00340772
	cg26837739	chr19	3885668	ATCAY	positive	3.56538e-29	1.08772e-07
	cg04897434	chr2	199179295	PLCL1	positive	3.72392e-29	0.00779018
	cg14513841	chr16	8736220	METTL22	positive	3.82392e-29	0.00302236
	cg14270292	chr6	133562494	EYA4	positive	3.86355e-29	0.00644994
	cg17464781	chr2	236471995	AGAP1	positive	3.92897e-29	2.51197e-05
	cg03458344	chr1	170964477	MROH9	positive	4.00154e-29	0.0182498
	cg07089275	chr16	1129990	SSTR5	positive	4.03063e-29	0.00651216
	cg04239664	chr2	220290997	DES	positive	4.07214e-29	0.0124351
	cg04541670	chr5	174150286	MSX2	positive	4.18678e-29	0.0139169
	cg06519278	chr9	16870704	BNC2	positive	4.21628e-29	0.0018515
	cg26917999	chr8	20112890	LZTS1	positive	4.33016e-29	0.000118554
	cg02726803	chr12	133196273	P2RX2	positive	4.43406e-29	0.0104407
	cg05538077	chr7	151146402	CRYGN	positive	4.46784e-29	0.00690063
	cg02375669	chr1	16082826	FBLIM1	positive	4.4689e-29	0.0446607
	cg23018598	chr7	141039505	TMEM178B	positive	4.70466e-29	0.000420662
	cg14645017	chr10	132977408	TCERG1L	positive	4.80302e-29	0.0334954
	cg01707976	chr16	4991230	PPL	positive	4.8459e-29	0.0100489
	cg16148948	chr4	163969871	NAF1	positive	5.13357e-29	0.013914
	cg01193403	chr4	7736302	SORCS2	positive	5.15439e-29	0.0035777
	cg05477405	chr18	45934454	ZBTB7C	positive	5.21173e-29	0.00384982
	cg08207466	chr19	42818481	TMEM145	positive	5.25047e-29	0.00279145
	cg23243030	chr1	19147221	TAS1R2	positive	5.30158e-29	5.22169e-06
	cg23094961	chr2	207506535	FAM237A	positive	5.74613e-29	0.000665563
	cg15466909	chr8	144842965	NA	positive	5.88985e-29	0.00066223
	cg17365391	chr14	37135101	PAX9	positive	5.94135e-29	0.00466465
	cg08256110	chr20	62009700	CHRNA4	positive	6.48395e-29	0.017929
	cg10118677	chr9	17134847	CNTLN	positive	6.6461e-29	8.64676e-05
	cg20648141	chr11	112292052	PTS	positive	6.66014e-29	0.0153459
	cg06069429	chr1	215590079	KCTD3	positive	6.69043e-29	0.0133584
	cg18954504	chr17	34819740	NA	positive	6.8082e-29	0.0104612
	cg14591280	chr7	71802113	CALN1	positive	6.86061e-29	1.25186e-05
	cg26238771	chr19	592158	HCN2	positive	6.97949e-29	0.012399
	cg01695591	chr1	22934081	EPHA8	positive	7.07119e-29	0.0107763
	cg12477716	chr17	47073436	IGF2BP1	positive	7.22135e-29	0.0119891
	cg25929351	chr14	38070469	FOXA1	positive	7.31633e-29	0.00828548
	cg07842022	chr20	37070631	SNHG11	positive	7.85293e-29	0.00859797
	cg06212297	chr16	48079666	ABCC12	positive	7.8771e-29	0.000391591
	cg13361428	chr19	13414084	CACNA1A	positive	7.87757e-29	0.000565205
	cg03707967	chr6	118097745	NUS1	positive	8.31544e-29	0.0157797
	cg16568692	chr17	49565500	CA10	positive	9.16754e-29	0.0117132
	cg01444487	chr19	34174967	CHST8	positive	9.29433e-29	0.00869862
	cg16491668	chr12	115150060	TBX3	positive	9.60878e-29	9.98668e-05
	cg01138967	chr19	1732905	ONECUT3	positive	9.872e-29	0.0197554
	cg22013249	chr2	23897260	KLHL29	positive	1.02706e-28	0.000111332
	cg14792270	chr11	85955165	EED	positive	1.05361e-28	0.00239512
	cg23121156	chr4	154710421	SFRP2	positive	1.06125e-28	0.023581
	cg01848383	chr3	71348606	FOXP1	negative	1.10158e-28	0.000490294
	cg10075976	chr12	99303715	ANKS1B	positive	1.12591e-28	0.0168497
	cg00156147	chr5	166721949	TENM2	positive	1.15207e-28	0.0312816
	cg12828667	chr17	71160536	SSTR2	positive	1.15375e-28	6.04016e-05
	cg06859807	chr2	117709858	DDX18	positive	1.22357e-28	0.00392399
	cg14067101	chr9	975825	DMRT3	positive	1.24103e-28	0.00010417
	cg05202985	chr12	114926138	TBX5-AS1	positive	1.25157e-28	0.0107251
	cg06063714	chr1	1951514	GABRD	positive	1.3392e-28	0.000122551
	cg01996799	chr2	207137767	ZDBF2	positive	1.35081e-28	0.0176809
	cg11588844	chr2	11133327	KCNF1	positive	1.37123e-28	0.0111364
	cg23288103	chr2	242499464	BOK	positive	1.41361e-28	6.00103e-05
	cg18310658	chr2	230138204	PID1	positive	1.48774e-28	0.0194125
	cg23747675	chr7	131485235	PODXL	positive	1.53394e-28	0.00637531
	cg24960149	chr7	156786278	MNX1	positive	1.54721e-28	0.0336118
	cg18527583	chr2	77856944	LRRTM4	positive	1.57618e-28	0.00414638
	cg26992600	chr14	37054509	NKX2-8	positive	1.5788e-28	0.0433707
	cg19198229	chr20	34891885	DLGAP4	positive	1.58204e-28	0.0119649
	cg00371702	chr3	25469125	RARB	positive	1.59752e-28	0.000165591
	cg27558485	chr3	195943149	SLC51A	positive	1.6305e-28	0.0134351
	cg06698707	chr19	758725	MISP	positive	1.65121e-28	0.000164078
	cg00888313	chr19	5344050	PTPRS	positive	1.68963e-28	0.00142519
	cg10189763	chr4	71337726	MUC7	positive	1.73797e-28	0.0267653
	cg19535609	chr12	122687758	LRRC43	positive	1.7513e-28	0.0459002
	cg15999356	chr11	101990755	YAP1	positive	1.75198e-28	0.00182843
	cg05781504	chr5	145713607	POU4F3	positive	1.75509e-28	0.0447015
	cg05132262	chr7	1428859	MICALL2	positive	1.82567e-28	0.00090499
	cg13098432	chr7	54360134	NA	positive	1.82936e-28	6.57152e-05
	cg19828444	chr20	60662464	TAF4	positive	1.85281e-28	0.000241891
	cg11299081	chr10	50991902	NA	positive	1.86537e-28	2.65733e-05
	cg04243770	chr17	40333832	KCNH4	positive	1.96681e-28	0.0418497
	cg09916336	chr2	74882132	SEMA4F	positive	1.98019e-28	0.0025842
	cg16465663	chr15	66285441	MEGF11	positive	2.01063e-28	0.00108704
	cg22652435	chr3	158786927	IQCJ-SCHIP1	positive	2.02368e-28	0.00107259
	cg06964190	chr11	61275247	MIR4488	positive	2.03534e-28	9.90291e-06
	cg16126957	chr19	57244633	ZIM2	positive	2.07954e-28	0.00639437
	cg11837076	chr1	1711588	NADK	negative	2.1032e-28	0.00423874
	cg24349610	chr10	119644968	RAB11FIP2	positive	2.12426e-28	0.000156821
	cg05593628	chr8	133227853	KCNQ3	positive	2.18977e-28	0.0279302
	cg18116968	chr7	25900668	RNU6-16P	positive	2.20978e-28	8.04389e-05
	cg16788803	chr3	54156332	CACNA2D3	positive	2.2275e-28	0.0292678
	cg13435317	chr10	95826508	PLCE1	positive	2.39199e-28	0.0195948
	cg05213379	chr5	72729890	BTF3	positive	2.47994e-28	0.000863522
	cg10144474	chr15	79531914	ANKRD34C-AS1	positive	2.51855e-28	6.56961e-06
	cg27331471	chr19	45809725	CKM	positive	2.53578e-28	0.0123252
	cg24143129	chr1	22921120	EPHA8	positive	2.70789e-28	0.0036611
	cg00597687	chr1	63785003	LINC00466	positive	2.88779e-28	0.0447706
	cg19493467	chr1	165377881	RXRG	positive	2.89431e-28	0.0138738
	cg10100094	chr13	22211539	MICU2	positive	2.99071e-28	0.0367765
	cg06289182	chr10	133485190	LINC01164	positive	3.01193e-28	0.0119987
	cg04417860	chr6	28505377	GPX6	positive	3.03394e-28	0.000769157
	cg08056240	chr16	24268164	CACNG3	positive	3.06348e-28	0.000386907
	cg12609893	chr12	64799377	XPOT	positive	3.07935e-28	0.042895
	cg23323891	chr14	57200519	OTX2	positive	3.10892e-28	0.00213196
	cg06783429	chr7	127673038	SND1	positive	3.20501e-28	0.00774287
	cg00811334	chr2	79739254	CTNNA2	positive	3.22831e-28	0.000353356
	cg01471264	chr2	119597415	EN1	positive	3.24094e-28	0.00116596
	cg18240412	chr11	17717818	MYOD1	positive	3.26099e-28	0.00037124
	cg16805360	chr12	114845223	TBX5	positive	3.45976e-28	0.00360682
	cg11359264	chr7	27233718	HOXA13	positive	3.49624e-28	1.29673e-06
	cg11560404	chr3	187388737	SST	positive	3.54791e-28	0.0338822
	cg06830500	chr14	60974461	SIX6	positive	3.65657e-28	0.0270697
	cg12206199	chr2	39187543	ARHGEF33	positive	3.66075e-28	0.0300509
	cg02846589	chr13	99828805	UBAC2-AS1	positive	3.69391e-28	0.000568596
	cg10425861	chr15	60286540	FOXB1	positive	3.96988e-28	0.000420608
	cg03140725	chr1	18201180	ACTL8	positive	4.21226e-28	0.0292976
	cg12018436	chr9	79517525	PRUNE2	positive	4.21928e-28	0.00170653
	cg07936585	chr2	238472405	PRLH	positive	4.23776e-28	0.00166896
	cg14476397	chr12	110151071	FAM222A	positive	4.28286e-28	0.0109599
	cg02387301	chr8	142878494	MROH5	positive	4.28716e-28	1.73561e-05
	cg10039188	chr6	72130209	LINC00472	positive	4.38769e-28	0.00060328
	cg17128312	chr19	12806824	FBXW9	positive	4.4092e-28	0.00199646
	cg19284054	chr1	19025353	PAX7	positive	4.5075e-28	0.00479651
	cg05458408	chr17	37764536	NEUROD2	positive	4.54333e-28	0.000302476
	cg17590551	chr16	1118471	SSTR5-AS1	positive	4.63754e-28	4.28868e-05
	cg14437649	chr14	37242935	SLC25A21	positive	4.81584e-28	0.0210757
	cg21767563	chr12	132841405	GALNT9	positive	4.81663e-28	0.000441185
	cg11703796	chr12	6055201	ANO2	positive	4.84531e-28	0.000277848
	cg23543123	chr4	48485569	SLC10A4	positive	4.98022e-28	0.00493195
	cg23085154	chr5	71014409	CARTPT	positive	4.98425e-28	0.00214675
	cg06568880	chr17	2166583	SMG6	negative	5.00801e-28	0.0348251
	cg24027397	chr3	181437712	SOX2-OT	positive	5.03643e-28	0.00413189
	cg14506260	chr10	25797307	GPR158	positive	5.13522e-28	0.000902754
	cg15553500	chr4	41880987	TMEM33	positive	5.19716e-28	0.00027844
	cg07968271	chr5	72634745	BTF3	positive	5.33703e-28	0.00511714
	cg19744211	chr14	95079224	SERPINA3	positive	5.36064e-28	0.0164575
	cg00748053	chr8	34137602	DUSP26	positive	5.43763e-28	0.00610746
	cg12181133	chr9	16870464	BNC2	positive	5.67794e-28	0.000211773
	cg05796277	chr5	121647856	SNCAIP	positive	5.68396e-28	0.000568552
	cg20428630	chr17	858122	NXN	positive	5.73077e-28	0.00132594
	cg05827944	chr16	71264282	HYDIN	positive	5.88915e-28	2.67077e-07
	cg17062949	chr16	9353183	MIR548X	positive	5.91996e-28	0.0120812
	cg18174258	chr1	247275326	LINC02897	positive	6.09924e-28	4.76372e-05
	cg10273821	chr15	28014188	OCA2	positive	6.15107e-28	0.00747595
	cg19809499	chr1	47882265	FOXE3	positive	6.27015e-28	5.312e-08
	cg07027506	chr8	3232664	CSMD1	positive	6.5031e-28	0.00326425
	cg17100098	chr4	111544781	PITX2	positive	6.55281e-28	0.021454
	cg07818503	chr5	121647864	SNCAIP	positive	6.61176e-28	0.000667656
	cg21747496	chr3	128445986	RAB7A	positive	6.90531e-28	0.0328112
	cg15976217	chr3	50562863	CACNA2D2	positive	6.92418e-28	0.00582784
	cg21376148	chr17	10276260	MYH13	positive	6.95671e-28	0.0140021
	cg26327877	chr14	99977166	CCNK	positive	7.02054e-28	0.000386686
	cg22516643	chr1	107682302	NTNG1	positive	7.04678e-28	0.0145201
	cg05963376	chr1	12105516	MIIP	positive	7.08506e-28	0.00090324
	cg09870385	chr17	41508973	MIR2117	positive	7.15051e-28	0.000363376
	cg04400972	chr1	117665053	TRIM45	positive	7.23639e-28	0.0090598
	cg23623587	chr16	20338852	GP2	positive	7.34504e-28	0.00190521
	cg11964314	chr12	44858069	NELL2	positive	7.40401e-28	7.50904e-07
	cg01416712	chr4	41750864	PHOX2B	positive	7.56086e-28	0.0208618
	cg18123760	chr2	3934010	LINC01304	positive	7.62853e-28	0.00908286
	cg09824615	chr14	77600014	ZDHHC22	positive	7.77021e-28	0.000461426
	cg14272287	chr16	5652181	RBFOX1	positive	8.02953e-28	0.0025681
	cg07036914	chr17	36577690	ARHGAP23	positive	8.61036e-28	3.91157e-07
	cg17032646	chr1	110692918	SLC6A17	positive	8.81848e-28	0.0378634
	cg13392793	chr11	69533448	FGF19	positive	9.03861e-28	0.00208273
	cg16127059	chr1	33347681	HPCA	positive	9.1938e-28	8.09536e-06
	cg25543640	chr10	103992020	PITX3	positive	9.33815e-28	0.00339196
	cg10951591	chr2	3933739	LINC01304	positive	9.44408e-28	0.00921111
	cg03331387	chr3	127114962	TPRA1	positive	9.83813e-28	1.47048e-05
	cg26723355	chr6	166076315	PDE10A	positive	1.00042e-27	0.00180863
	cg10824810	chr16	54967714	IRX5	positive	1.00389e-27	0.00119663
	cg25720804	chr5	170736389	TLX3	positive	1.00674e-27	0.000290856
	cg14853896	chr19	46478091	NOVA2	positive	1.01495e-27	0.000447525
	cg08470863	chr3	77524776	ROBO2	positive	1.02979e-27	2.51725e-05
	cg27569752	chr17	10452975	MYH2	positive	1.05912e-27	0.0043042
	cg03885271	chr20	61637547	BHLHE23	positive	1.07028e-27	0.0111092
	cg13288545	chr8	145558858	SCRT1	positive	1.08255e-27	0.000393643
	cg02356702	chr13	114319334	GRK1	positive	1.08442e-27	0.000482023
	cg19659420	chr3	69101892	TMF1	positive	1.08947e-27	0.0130749
	cg16850173	chr9	140033611	GRIN1	positive	1.10737e-27	0.00138249
	cg21148404	chr18	34833339	CELF4	positive	1.11148e-27	0.000369204
	cg22045001	chr1	14218474	PRDM2	positive	1.11697e-27	0.00091642
	cg23391473	chr2	12911008	TRIB2	positive	1.12571e-27	0.000237275
	cg20552648	chr8	131864806	ADCY8	positive	1.12846e-27	0.00769274
	cg14672354	chr5	173763055	NSG2	positive	1.13014e-27	0.00118527
	cg13577628	chr1	119534899	TBX15	positive	1.17393e-27	0.000103471
	cg25924192	chr3	83996001	LINC00971	positive	1.17932e-27	0.00372428
	cg09354267	chr6	106774064	ATG5	positive	1.19344e-27	0.00480566
	cg24757937	chr14	61111558	SIX1	positive	1.21579e-27	0.00145061
	cg02120611	chr16	51909878	LINC02911	positive	1.22896e-27	0.00018907
	cg11128026	chr15	86870876	AGBL1	positive	1.23057e-27	0.00855061
	cg17162830	chr12	53215674	KRT79	positive	1.23527e-27	0.0145956
	cg26673012	chr7	35293753	TBX20	positive	1.24995e-27	0.000259343
	cg17235203	chr12	113984651	LHX5	positive	1.26358e-27	0.00973024
	cg11163773	chr11	132182806	NTM	positive	1.27641e-27	0.0100125
	cg14164215	chr6	135231087	ALDH8A1	positive	1.30183e-27	0.0305723
	cg23923204	chr11	74959339	TPBGL	positive	1.32581e-27	0.0176676
	cg04197980	chr17	11162890	SHISA6	positive	1.33814e-27	0.00169972
	cg16954765	chr1	5159913	AJAP1	positive	1.39476e-27	0.0314237
	cg19940312	chr4	20257590	SLIT2	positive	1.46156e-27	0.0282967
	cg17494946	chr7	155754659	SHH	positive	1.46959e-27	0.00133869
	cg00167525	chr19	15190974	OR1I1	positive	1.55228e-27	0.00526288
	cg25616777	chr1	27645056	TMEM222	positive	1.59201e-27	0.0221543
	cg03084838	chr16	751603	FBXL16	positive	1.64174e-27	0.0286502
	cg16339238	chr20	23029298	THBD	positive	1.6438e-27	0.0187094
	cg09156597	chr1	231472815	EXOC8	positive	1.67725e-27	0.00181682
	cg01218148	chr9	34523776	ENHO	positive	1.70008e-27	0.00136633
	cg05775627	chr12	49690254	PRPH	positive	1.70243e-27	0.0166239
	cg24128202	chr22	30643917	LIF	positive	1.70471e-27	0.00420268
	cg12615235	chr16	1969016	HS3ST6	positive	1.70688e-27	0.000520541
	cg01140899	chr18	10454538	APCDD1	positive	1.78862e-27	0.000413646
	cg15742445	chr11	69794670	ANO1	positive	1.86243e-27	0.00233964
	cg17938383	chr17	11146040	SHISA6	positive	1.87945e-27	0.0164396
	cg07665063	chr12	125257223	SCARB1	positive	1.89546e-27	0.000247729
	cg24843474	chr1	241520598	RGS7	positive	1.91104e-27	0.0221749
	cg13509350	chr10	111171746	XPNPEP1	positive	1.936e-27	0.00110883
	cg05457417	chr10	93518662	TNKS2	positive	1.94399e-27	0.00117094
	cg18817990	chr4	13543119	NKX3-2	positive	1.97083e-27	1.87251e-05
	cg17035304	chr22	30109555	CABP7	positive	1.98234e-27	0.00229005
	cg03413337	chr4	3825614	ADRA2C	positive	2.00114e-27	0.0101555
	cg26859099	chr11	13794724	FAR1	positive	2.07123e-27	0.0305614
	cg02259947	chr12	111463746	CUX2	positive	2.07594e-27	2.23051e-05
	cg13924695	chr12	54362882	HOTAIR	positive	2.09342e-27	0.025022
	cg00369376	chr2	182542510	CERKL	positive	2.11228e-27	0.0288279
	cg07128846	chr3	116476085	TUSC7	positive	2.14885e-27	0.000117517
	cg03927133	chr15	41794293	ITPKA	positive	2.15341e-27	0.0234695
	cg13875003	chr9	98782979	LINC00092	positive	2.17381e-27	0.0239415
	cg26085533	chr17	32950846	TMEM132E	positive	2.17398e-27	0.000119182
	cg02256384	chr14	95538245	DICER1	positive	2.19388e-27	0.0130055
	cg14917557	chr11	70998074	SHANK2	positive	2.29409e-27	0.00790684
	cg03814321	chr1	51810337	TTC39A	positive	2.30026e-27	0.000328324
	cg18070753	chr7	73035779	MLXIPL	positive	2.3014e-27	0.000304849
	cg01772908	chr8	17659629	MTUS1	positive	2.34256e-27	0.00864847
	cg11957350	chr19	6964164	ADGRE4P	positive	2.45294e-27	0.00599111
	cg21813612	chr12	113957655	LHX5	positive	2.50142e-27	0.0346961
	cg17711870	chr8	87354470	WWP1	positive	2.57001e-27	0.000665982
	cg02141701	chr3	63263775	SYNPR	positive	2.68208e-27	0.000426329
	cg21221786	chr9	126800366	LHX2	positive	2.69911e-27	0.000869017
	cg18588644	chr12	108797860	CMKLR1	positive	2.70815e-27	0.0029722
	cg23834895	chr11	22359658	SLC17A6	positive	2.71149e-27	0.000517269
	cg23781497	chr17	40273569	KAT2A	positive	2.77872e-27	3.36604e-05
	cg16969368	chr17	57642752	DHX40	positive	2.78967e-27	0.0332311
	cg02809611	chr16	3253368	OR1F1	positive	2.82382e-27	0.0366354
	cg14532218	chr15	46241811	SQOR	positive	2.83897e-27	0.0192121
	cg06616976	chr7	1361231	UNCX	positive	2.88958e-27	0.000186921
	cg05356778	chr7	71115920	GALNT17	positive	2.9246e-27	0.00202319
	cg24762501	chr19	51530751	KLK11	positive	2.94295e-27	0.00134601
	cg03719793	chr5	4557632	LINC01020	positive	2.99744e-27	0.000654416
	cg20139094	chr20	31797907	BPIFA4P	positive	3.14734e-27	0.013911
	cg18063312	chr5	72740737	BTF3	positive	3.149e-27	0.0301813
	cg00413250	chr16	13155767	SHISA9	positive	3.15786e-27	0.000239305
	cg02894895	chr20	47077478	LINC00494	positive	3.23804e-27	2.03914e-05
	cg10145000	chr1	218390493	RRP15	positive	3.2675e-27	0.000162801
	cg03812136	chr1	18217223	ACTL8	positive	3.3633e-27	7.90031e-05
	cg15042150	chr19	18654681	FKBP8	positive	3.38279e-27	0.0135443
	cg16468389	chr17	46831742	TTLL6	positive	3.4897e-27	0.000722506
	cg12170048	chr4	492375	ZNF721	positive	3.58293e-27	0.00170877
	cg10515131	chr14	99708008	BCL11B	positive	3.5884e-27	0.0120938
	cg23313990	chr21	23576428	LINC00308	positive	3.77843e-27	0.0389611
	cg17740722	chr19	57337294	ZIM2	positive	3.80167e-27	0.0177464
	cg01995067	chr16	863240	PRR25	positive	3.82315e-27	0.0312085
	cg18044415	chr8	56013536	XKR4	positive	3.88593e-27	0.000872442
	cg22982480	chr3	11098410	SLC6A1	positive	3.8889e-27	0.00034578
	cg15883134	chr14	57359908	OTX2-AS1	positive	3.98225e-27	0.00313617
	cg17236169	chr11	64480683	NRXN2	positive	4.12627e-27	0.0125663
	cg26367013	chr14	93385970	CHGA	positive	4.16226e-27	1.13353e-08
	cg00719768	chr7	1465349	MICALL2	positive	4.19981e-27	0.0155363
	cg12678433	chr2	237022804	AGAP1	positive	4.32154e-27	0.0465368
	cg01010753	chr6	116355605	FRK	positive	4.33045e-27	0.0174525
	cg05627083	chr18	10454684	APCDD1	positive	4.37259e-27	3.77665e-07
	cg06605933	chr1	149870977	BOLA1	positive	4.49007e-27	0.00592141
	cg03566822	chr10	64578476	EGR2	positive	4.50234e-27	0.00204237
	cg02627966	chr7	54899537	SEC61G	positive	4.55688e-27	0.00274223
	cg02272395	chr5	140419666	PCDHB1	positive	4.61791e-27	0.0114932
	cg03700624	chr5	2629454	IRX2	positive	4.6458e-27	0.00541169
	cg08772837	chr5	140344290	PCDHAC1	positive	4.68939e-27	0.00170209
	cg09769542	chr16	52582262	TOX3	positive	4.90647e-27	5.29487e-05
	cg12451926	chr8	17272048	MTMR7	positive	4.9589e-27	0.0406897
	cg18960668	chr1	203096657	ADORA1	positive	5.0665e-27	0.000421276
	cg03811763	chr16	1144264	C1QTNF8	positive	5.13439e-27	0.000539965
	cg05095428	chr2	69239676	ANTXR1	positive	5.14896e-27	0.000515977
	cg06037077	chr7	75862177	SRRM3	positive	5.33022e-27	5.97907e-05
	cg19767205	chr5	141255282	PCDH1	positive	5.4149e-27	0.000566989
	cg18850089	chr19	14170116	PALM3	positive	5.45079e-27	0.0485933
	cg18283187	chr15	96714359	NR2F2-AS1	positive	5.46774e-27	0.0259815
	cg24141663	chr1	203095747	ADORA1	positive	5.48215e-27	0.00390013
	cg15661865	chr2	27632926	PPM1G	positive	5.63917e-27	0.0158542
	cg01446500	chr2	235087368	SPP2	positive	5.71784e-27	2.87377e-06
	cg09766510	chr16	87174481	C16orf95	positive	5.8464e-27	0.0127388
	cg14846617	chr14	96042434	GLRX5	positive	5.85782e-27	0.000168745
	cg11991566	chr20	55917372	NA	positive	6.03619e-27	0.00525479
	cg19879455	chr14	88179238	GALC	positive	6.09713e-27	0.0259727
	cg06777265	chr8	49748488	SNAI2	positive	6.16473e-27	0.010116
	cg11627808	chr15	24919736	NPAP1	positive	6.19042e-27	0.000412791
	cg06584758	chr12	108856643	FICD	positive	6.19046e-27	4.28539e-05
	cg11836212	chr1	37447865	GRIK3	positive	6.25082e-27	0.00193859
	cg15990972	chr2	177012372	MIR10B	positive	6.25407e-27	0.000107232
	cg06806922	chr13	102438434	FGF14	positive	6.27831e-27	0.0149363
	cg02383785	chr7	127808848	MIR129-1	positive	6.37949e-27	0.00569718
	cg18836319	chr6	27258767	POM121L2	positive	6.44139e-27	0.000162693
	cg11856822	chr1	247274777	LINC02897	positive	6.54134e-27	0.00374442
	cg11391012	chr7	47621804	TNS3	positive	6.56579e-27	2.99747e-05
	cg09901058	chr8	133153112	KCNQ3	positive	6.59159e-27	2.73653e-06
	cg10825068	chr14	58410030	ARMH4	positive	6.60178e-27	0.000571665
	cg14040722	chr20	37229509	ARHGAP40	positive	6.60309e-27	8.98252e-05
	cg18234352	chr19	18977405	UPF1	positive	6.70082e-27	0.0060531
	cg03415883	chr10	102279908	SEC31B	positive	6.89077e-27	0.00526338
	cg27268486	chr7	79764291	GNAI1	positive	6.95763e-27	0.000320954
	cg13624095	chr16	47921211	PHKB	positive	7.00816e-27	0.00958112
	cg10187178	chr17	77482457	RBFOX3	positive	7.06644e-27	0.0266635
	cg03017946	chr4	72897281	NPFFR2	positive	7.19289e-27	0.00130472
	cg19663999	chr2	220174456	PTPRN	positive	7.19566e-27	0.000384997
	cg24915574	chr15	44511941	FRMD5	positive	7.26706e-27	0.00389772
	cg12688609	chr1	51811022	TTC39A	positive	7.27151e-27	2.8112e-07
	cg27343222	chr22	30115154	CABP7	positive	7.52883e-27	0.000438375
	cg08473487	chr19	51504516	KLK8	positive	7.61781e-27	0.0037056
	cg15117847	chr6	6191894	F13A1	positive	7.93243e-27	0.0209436
	cg08160462	chr1	32238731	ADGRB2	positive	7.945e-27	0.0181777
	cg16624915	chr20	1970184	PDYN	positive	8.07274e-27	0.000612296
	cg12446629	chr8	132052044	ADCY8	positive	8.29224e-27	0.0055048
	cg18007049	chr17	31617566	ASIC2	positive	8.36893e-27	0.000178156
	cg07892785	chr3	39851788	MYRIP	positive	8.47552e-27	0.000994458
	cg02856004	chr2	162274111	TBR1	positive	8.59722e-27	0.00168015
	cg23484599	chr11	31831137	PAX6	positive	8.71468e-27	0.000865584
	cg23007368	chr7	126707141	GRM8	positive	8.88788e-27	0.0050063
	cg21395018	chr3	121311783	FBXO40	positive	9.10345e-27	0.00170018
	cg24476826	chr15	29904571	FAM189A1	positive	9.11843e-27	0.000615321
	cg27136844	chr3	147142355	ZIC1	positive	9.51597e-27	0.00101765
	cg18938196	chr11	45773315	LINC02716	positive	9.67388e-27	0.0027709
	cg13039454	chr7	41099611	SUGCT	positive	9.71173e-27	6.55926e-07
	cg12764532	chr13	112998887	SPACA7	positive	9.72759e-27	0.000411736
	cg15388804	chr14	36993079	NKX2-1	positive	9.78809e-27	0.026078
	cg23120942	chr17	58755752	BCAS3	positive	9.84073e-27	0.00153701
	cg23209487	chr4	112699859	FAM241A	positive	9.93841e-27	0.0405199
	cg20600729	chr12	50344475	AQP2	positive	1.03692e-26	0.00185024
	cg27341236	chr2	77750535	LRRTM4	positive	1.06141e-26	0.0106319
	cg09820150	chr5	87985219	LINC00461	positive	1.08372e-26	0.000772905
	cg22788329	chr4	3642351	LINC02171	positive	1.11836e-26	0.00730895
	cg23092714	chr2	219856218	CRYBA2	positive	1.13912e-26	0.00204557
	cg09148471	chr1	109734115	ELAPOR1	positive	1.14288e-26	0.0209888
	cg26718878	chr7	96647882	DLX5	positive	1.14485e-26	0.00345423
	cg07283384	chr4	8645170	CPZ	positive	1.17246e-26	0.000218638
	cg20092754	chr7	71801990	CALN1	positive	1.18803e-26	2.13702e-06
	cg17485169	chr20	45640978	EYA2	positive	1.21562e-26	0.0403125
	cg09413492	chr7	100615476	MUC12	positive	1.24633e-26	0.0109213
	cg00192297	chr2	200330296	SATB2	positive	1.31071e-26	0.000607577
	cg06005169	chr2	176984634	HOXD10	positive	1.33644e-26	0.00260997
	cg03919381	chr10	129398910	NPS	positive	1.34215e-26	0.00740546
	cg11794430	chr19	47942269	SLC8A2	positive	1.3816e-26	0.00854212
	cg10361013	chr10	43763345	RASGEF1A	positive	1.40436e-26	0.00870511
	cg00844308	chr9	99800808	CTSV	positive	1.41749e-26	0.00380413
	cg16125023	chr4	156130560	NPY2R	positive	1.42395e-26	0.00541859
	cg09539496	chr8	20164433	LZTS1-AS1	positive	1.44367e-26	0.00669808
	cg01842146	chr2	119027134	INSIG2	positive	1.45904e-26	0.0396131
	cg03411346	chr6	25652109	SCGN	positive	1.49146e-26	6.92658e-05
	cg04768495	chr12	77719878	E2F7	positive	1.51438e-26	0.00337737
	cg13702288	chr20	36530514	VSTM2L	positive	1.51803e-26	0.000944525
	cg19450816	chr2	237551858	ACKR3	positive	1.54236e-26	2.04385e-05
	cg22616881	chr7	96642096	DLX6-AS1	positive	1.56437e-26	0.0230501
	cg01047647	chr12	103555984	C12orf42	positive	1.58303e-26	0.0322156
	cg26564042	chr21	44628907	CRYAA	positive	1.5842e-26	0.0053724
	cg14384224	chr9	140031310	GRIN1	positive	1.60241e-26	3.12369e-05
	cg01160763	chr16	86124162	IRF8	positive	1.60496e-26	9.04109e-05
	cg11161837	chr1	110010384	SYPL2	positive	1.60701e-26	0.0161794
	cg12853461	chr19	54384844	PRKCG	positive	1.61652e-26	0.0010315
	cg10265365	chr19	42827690	TMEM145	positive	1.62004e-26	0.00143684
	cg26413900	chr17	43985654	MAP3K14	positive	1.66052e-26	0.0100804
	cg15401332	chr5	111319725	NREP-AS1	positive	1.69806e-26	0.00764505
	cg26906037	chr10	134900247	ADGRA1	positive	1.69876e-26	0.000958494
	cg23677291	chr11	56923527	LRRC55	positive	1.73491e-26	0.0142394
	cg15187398	chr19	2093896	MOB3A	positive	1.74103e-26	0.00181508
	cg13056927	chr3	42727915	KLHL40	positive	1.76473e-26	0.000206264
	cg10078829	chr19	51415452	KLK4	positive	1.76642e-26	2.77196e-05
	cg25661884	chr19	10124267	RDH8	positive	1.78803e-26	0.0267842
	cg13436810	chr8	139873756	COL22A1	positive	1.79244e-26	0.000390473
	cg04731710	chr9	16870677	BNC2	positive	1.80059e-26	6.93533e-05
	cg15791248	chr8	38326730	FGFR1	positive	1.82247e-26	0.00100184
	cg01693328	chr7	108101162	NRCAM	positive	1.86114e-26	0.00075833
	cg23339038	chr12	118152107	KSR2	positive	1.87228e-26	0.000390956
	cg22593006	chr6	170603682	DLL1	positive	1.88099e-26	3.99592e-06
	cg06537609	chr5	176217086	UNC5A	positive	1.8963e-26	0.000610298
	cg15586196	chr9	120177338	ASTN2	positive	1.90424e-26	0.00493978
	cg02721902	chr17	46825371	TTLL6	positive	1.921e-26	8.2334e-06
	cg01102696	chr9	96583121	MIR4291	positive	1.96159e-26	2.92244e-05
	cg01893212	chr7	49813088	VWC2	positive	1.97037e-26	0.000540212
	cg07472438	chr2	230135929	PID1	positive	2.01142e-26	0.000894925
	cg19958582	chr16	10107504	GRIN2A	positive	2.02577e-26	0.000632994
	cg19419588	chr1	38106548	RSPO1	positive	2.03163e-26	0.0229935
	cg19085507	chr4	94753295	ATOH1	positive	2.04915e-26	0.00148953
	cg06178055	chr4	189029280	TRIML2	positive	2.06958e-26	0.00132785
	cg08086873	chr8	25864868	PPP2R2A	positive	2.08675e-26	0.000312711
	cg20377955	chr7	20827825	SP8	positive	2.11916e-26	0.0405525
	cg14222939	chr18	49866097	DCC	positive	2.12352e-26	0.0332751
	cg02714994	chr19	15870836	CYP4F24P	positive	2.17609e-26	4.31559e-05
	cg08213774	chr2	2335909	MYT1L	positive	2.18771e-26	5.48222e-08
	cg01256846	chr15	90456541	ARPIN-AP3S2	positive	2.19422e-26	0.0112649
	cg25487047	chr5	140389945	PCDHAC2	positive	2.19781e-26	0.0016536
	cg26469215	chr4	105888253	TET2	negative	2.2158e-26	0.00457081
	cg25262261	chr3	196670603	NCBP2AS2	positive	2.25562e-26	0.048612
	cg26309552	chr19	18344583	PDE4C	positive	2.27632e-26	0.00156445
	cg10443972	chr11	45773308	LINC02716	positive	2.2897e-26	0.00365337
	cg07183637	chr6	31940692	HLA-DRB5	positive	2.39113e-26	0.0197319
	cg25390223	chr18	32129220	DTNA	positive	2.44851e-26	0.0447422
	cg21544805	chr1	8334656	SLC45A1	positive	2.49194e-26	0.00295613
	cg03210400	chr15	96582394	NR2F2-AS1	positive	2.49357e-26	0.00528059
	cg06321808	chr10	71389579	FAM241B	positive	2.58374e-26	0.00134204
	cg04619951	chr10	29593803	LYZL1	positive	2.5931e-26	0.00544098
	cg19416947	chr5	1761103	MRPL36	positive	2.60857e-26	0.00108699
	cg05083647	chr1	204897364	NFASC	positive	2.61412e-26	0.0059539
	cg02609880	chr1	156611087	BCAN	positive	2.62387e-26	0.000420986
	cg00550214	chr1	149870975	BOLA1	positive	2.68194e-26	0.0131858
	cg16461316	chr19	49941510	SLC17A7	positive	2.70739e-26	0.0494346
	cg17336149	chr1	160367774	VANGL2	positive	2.77654e-26	0.0365005
	cg02825985	chr22	49579410	LINC01310	positive	2.85962e-26	0.00431233
	cg21636374	chr20	21511011	NKX2-2	positive	2.87291e-26	0.013532
	cg21583957	chr3	156782951	LINC00880	positive	2.9633e-26	1.59761e-05
	cg18075319	chr14	53320312	FERMT2	positive	3.00029e-26	0.0011822
	cg07212940	chr3	62304165	PTPRG-AS1	positive	3.02723e-26	0.00068794
	cg11451198	chr6	150599060	PPP1R14C	positive	3.11552e-26	3.06442e-05
	cg22006708	chr8	11451194	LINC00208	positive	3.13842e-26	0.00154717
	cg23039195	chr10	22624663	COMMD3-BMI1	positive	3.16832e-26	0.0299303
	cg16097907	chr19	29468967	LINC00906	positive	3.1948e-26	0.0127482
	cg10800026	chr11	66783241	SYT12	positive	3.24501e-26	0.031195
	cg18385190	chr14	104940369	C14orf180	positive	3.2726e-26	0.0484747
	cg17312632	chr4	6227099	JAKMIP1-DT	positive	3.29118e-26	0.00129288
	cg19131227	chr11	2162917	IGF2	positive	3.36965e-26	0.014207
	cg24609704	chr8	56278894	XKR4	positive	3.494e-26	0.00255222
	cg15679211	chr20	41669157	PTPRT	positive	3.62014e-26	0.00746802
	cg26178732	chr5	153860476	HAND1	positive	3.70089e-26	0.00686754
	cg24727109	chr5	72509529	TMEM174	positive	3.71939e-26	0.0393653
	cg10196737	chr7	105683109	CDHR3	positive	3.76271e-26	0.0231907
	cg11975652	chr7	127251054	PAX4	positive	3.77526e-26	2.07695e-05
	cg08020100	chr1	215805150	USH2A	positive	3.79609e-26	1.75335e-05
	cg16756674	chr10	134791043	LINC01168	positive	3.81196e-26	0.0188761
	cg16638920	chr5	87974012	LINC00461	positive	3.91251e-26	2.88195e-05
	cg13798384	chr13	67636112	PCDH9	positive	4.03889e-26	0.01877
	cg01107240	chr16	74054182	PSMD7	positive	4.06599e-26	0.00157086
	cg07824172	chr4	104641548	TACR3	positive	4.15202e-26	0.0019053
	cg21132924	chr6	169069901	SMOC2	positive	4.24213e-26	0.041923
	cg05089225	chr4	7395027	SORCS2	positive	4.31158e-26	0.0186714
	cg27495903	chr10	21463009	NEBL-AS1	positive	4.3253e-26	0.004847
	cg11679726	chr5	9198759	SEMA5A	positive	4.32663e-26	0.000337697
	cg07648143	chr17	74905899	MGAT5B	positive	4.33898e-26	6.59983e-05
	cg21734094	chr19	30867158	ZNF536	positive	4.38216e-26	0.00311676
	cg13804377	chr1	2561122	MMEL1	positive	4.49152e-26	2.20807e-06
	cg08576794	chr22	47804357	LINC00898	positive	4.49413e-26	0.00918575
	cg23153216	chr15	88805466	NTRK3-AS1	positive	4.59346e-26	0.0363022
	cg23433430	chr4	41362520	LIMCH1	positive	4.64274e-26	0.000496764
	cg06809604	chr11	101982988	YAP1	positive	4.68012e-26	0.00350603
	cg18406457	chr19	32514009	ZNF507	positive	4.76779e-26	0.000622471
	cg00173623	chr15	58358236	ALDH1A2	positive	4.81001e-26	0.000457242
	cg00496828	chr17	78455283	NPTX1	positive	4.94259e-26	0.00062257
	cg02760152	chr1	57886427	DAB1	positive	5.12281e-26	0.0235374
	cg04234014	chr19	11565385	ELAVL3	positive	5.13165e-26	0.00169263
	cg04858335	chr16	8736327	METTL22	positive	5.19313e-26	0.0233416
	cg09102996	chr10	72044135	NPFFR1	positive	5.32957e-26	7.87136e-05
	cg15081344	chr1	35396310	DLGAP3	positive	5.3862e-26	0.000447007
	cg05492170	chr4	111536341	PITX2	positive	5.45726e-26	0.000979688
	cg07912789	chr12	3600273	PRMT8	positive	5.54776e-26	0.0232568
	cg03688400	chr22	40061578	CACNA1I	positive	5.62138e-26	0.0208216
	cg06307809	chr7	24798105	GSDME	positive	5.65774e-26	0.00746236
	cg27183726	chr19	34112306	CHST8	positive	5.6963e-26	0.000564957
	cg24032137	chr8	112388566	CSMD3	positive	5.76174e-26	0.0368231
	cg06881040	chr16	30040916	SLX1B-SULT1A4	positive	5.90988e-26	7.53308e-05
	cg09440866	chr12	114014510	LHX5	positive	5.96621e-26	0.00224098
	cg10283695	chr11	107465210	ELMOD1	positive	5.96875e-26	0.0121355
	cg08003435	chr2	16082471	MYCN	positive	5.98725e-26	0.000717811
	cg14115936	chr7	73002496	MLXIPL	positive	5.98741e-26	0.0329124
	cg04974854	chr14	27065267	NOVA1	positive	5.99119e-26	0.0130223
	cg21041694	chr3	9623509	LHFPL4	positive	6.11342e-26	0.0263114
	cg25641240	chr10	50970979	NA	positive	6.16902e-26	0.00232949
	cg23704195	chr17	59531104	TBX4	positive	6.26319e-26	0.00492727
	cg24872782	chr5	15500249	FBXL7	positive	6.31041e-26	0.000275361
	cg06427054	chr4	54963174	PDGFRA	positive	6.32324e-26	0.0117901
	cg09337043	chr7	158343715	PTPRN2	positive	6.5019e-26	5.52279e-05
	cg10582827	chr6	28584464	GPX6	positive	6.52258e-26	0.000382839
	cg13068285	chr8	80522759	STMN2	positive	6.59438e-26	0.0216958
	cg25598400	chr17	39624076	KRT32	positive	6.59713e-26	0.000375599
	cg08450145	chr4	7289894	SORCS2	positive	6.62693e-26	0.00215676
	cg07748847	chr12	14124857	GRIN2B	positive	6.62863e-26	0.000844005
	cg21982579	chr1	242613100	PLD5	positive	6.83832e-26	0.0021389
	cg15106134	chr3	181428466	SOX2-OT	positive	7.09953e-26	0.0210675
	cg02366798	chr7	27237154	HOXA13	positive	7.10999e-26	0.000754157
	cg02865595	chr1	36771714	SH3D21	positive	7.12939e-26	0.0012902
	cg25563799	chr10	102089882	PKD2L1	positive	7.25582e-26	0.023635
	cg11176135	chr14	74705942	VSX2	positive	7.34765e-26	0.00113327
	cg10239022	chr12	131533104	ADGRD1	positive	7.44671e-26	2.50786e-05
	cg00440531	chr3	137478664	SOX14	positive	7.57235e-26	0.0212892
	cg12629359	chr11	69914062	ANO1	positive	7.59292e-26	0.0470659
	cg20671534	chr2	220174629	PTPRN	positive	7.79911e-26	3.16067e-05
	cg17389400	chr11	112592837	NCAM1	positive	7.9388e-26	0.00547957
	cg02608054	chr11	82610918	PRCP	positive	7.96953e-26	0.0303587
	cg06301033	chr16	48076481	ABCC12	positive	8.00971e-26	0.000297848
	cg24720069	chr1	240815908	GREM2	positive	8.12224e-26	4.08011e-05
	cg04014686	chr3	116164943	LSAMP	positive	8.35335e-26	0.0313687
	cg09997791	chr14	100196181	CYP46A1	positive	8.35989e-26	0.0191699
	cg04974062	chr6	100056787	PRDM13	positive	8.51135e-26	7.14465e-06
	cg12593138	chr12	53439997	LOC283335	positive	8.52627e-26	8.67099e-07
	cg19055411	chr20	42033649	SRSF6	positive	8.54127e-26	0.00756648
	cg07432626	chr5	146889536	DPYSL3	positive	8.63155e-26	0.0217721
	cg12366650	chr1	201881036	LMOD1	positive	8.7694e-26	0.00122245
	cg02485491	chr16	5266295	EEF2KMT	positive	8.86385e-26	0.0229869
	cg06819546	chr3	62360674	FEZF2	positive	8.8649e-26	7.29054e-05
	cg18942247	chr20	37070648	SNHG11	positive	9.29676e-26	0.0362068
	cg14853194	chr8	495822	TDRP	positive	9.32098e-26	8.9735e-05
	cg18733255	chr17	39942970	JUP	positive	9.41961e-26	0.0115323
	cg26564369	chr2	96783306	ADRA2B	positive	9.45577e-26	0.000247248
	cg16441900	chr17	750848	NXN	positive	9.60785e-26	0.0035996
	cg01499217	chr18	10454681	APCDD1	positive	9.77602e-26	0.000285047
	cg02300154	chr7	70597058	GALNT17	positive	9.77731e-26	0.000573335
	cg06328165	chr16	51248634	SALL1	positive	9.94428e-26	0.0284646
	cg19800855	chr14	102186384	LINC00239	positive	9.97279e-26	0.000583588
	cg22340526	chr7	153586207	DPP6	positive	9.97725e-26	0.0135196
	cg27487370	chr2	231915841	C2orf72	positive	1.01558e-25	0.00219572
	cg07712540	chr10	15763316	ITGA8	positive	1.03381e-25	0.000680792
	cg16174370	chr9	95947149	WNK2	positive	1.03891e-25	0.00393735
	cg15242637	chr15	23815778	MKRN3	positive	1.04274e-25	7.18865e-05
	cg01421830	chr9	138626955	KCNT1	positive	1.05809e-25	0.0149244
	cg04513912	chr7	156409788	NA	positive	1.11627e-25	0.00170875
	cg17363540	chr11	57001479	APLNR	positive	1.1203e-25	2.98611e-06
	cg00540593	chr20	61977814	CHRNA4	positive	1.12185e-25	0.00128127
	cg20222376	chr19	15530606	AKAP8L	negative	1.12833e-25	0.0342611
	cg26947127	chr12	12901747	DDX47	negative	1.13498e-25	0.00311109
	cg04145601	chr20	44641469	MMP9	positive	1.1375e-25	0.0475094
	cg00528638	chr17	59529623	TBX4	positive	1.16427e-25	0.0188292
	cg26555777	chr19	38885050	SPRED3	positive	1.17774e-25	3.63878e-05
	cg02225567	chr9	136451569	FAM163B	positive	1.20776e-25	0.00265798
	cg26437180	chr8	42699283	THAP1	positive	1.20839e-25	0.00470539
	cg09862733	chr19	49631106	PPFIA3	positive	1.20844e-25	0.00290539
	cg06988642	chr9	132274000	LINC00963	positive	1.24359e-25	0.0414361
	cg22296874	chr13	88151154	MIR4500HG	positive	1.24593e-25	0.00148359
	cg06529676	chr5	170119162	KCNIP1	positive	1.26149e-25	0.00502925
	cg16463558	chr11	101918710	CFAP300	positive	1.26607e-25	0.00484338
	cg13854341	chr7	70595507	GALNT17	positive	1.29916e-25	0.000352288
	cg00453773	chr22	30754214	CCDC157	positive	1.31201e-25	6.14646e-06
	cg15295732	chr17	43942128	MAP3K14	positive	1.32676e-25	0.000894954
	cg08855449	chr3	147125962	ZIC1	positive	1.32811e-25	0.000971693
	cg17494980	chr14	29859517	MIR548AI	positive	1.34283e-25	0.00929064
	cg02204474	chr20	57169343	APCDD1L-DT	positive	1.34895e-25	0.000959903
	cg19942454	chr10	1559193	ADARB2	positive	1.36888e-25	0.000139765
	cg26591829	chr1	227922241	SNAP47	positive	1.39351e-25	0.00448751
	cg18335505	chr2	131514588	AMER3	positive	1.40123e-25	4.37394e-05
	cg18438471	chr5	44604163	MRPS30	positive	1.41088e-25	0.0001028
	cg22365906	chr12	99548546	ANKS1B	positive	1.41402e-25	0.0060885
	cg00950265	chr14	60974389	SIX6	positive	1.45405e-25	0.00692772
	cg10505973	chr14	104940386	C14orf180	positive	1.45499e-25	0.00875096
	cg26517714	chr5	170736245	TLX3	positive	1.46196e-25	5.47527e-05
	cg05905155	chr16	30814125	ZNF629	positive	1.46492e-25	7.66224e-07
	cg23334840	chr16	6245819	RBFOX1	positive	1.47272e-25	0.00342569
	cg18114036	chr1	156260918	TMEM79	positive	1.49897e-25	0.00721067
	cg03408556	chr1	247274709	LINC02897	positive	1.50075e-25	0.0112751
	cg25137204	chr11	72975404	P2RY6	positive	1.50701e-25	0.0116104
	cg05677244	chr20	47198711	PREX1	positive	1.52344e-25	0.00340549
	cg18007959	chr5	153863525	HAND1	positive	1.527e-25	0.00415647
	cg23014487	chr1	20669407	VWA5B1	positive	1.54305e-25	2.88006e-06
	cg02400581	chr6	165645198	C6orf118	positive	1.55349e-25	5.62203e-05
	cg06628109	chr16	86275413	LINC02135	positive	1.56473e-25	0.00531515
	cg05463164	chr12	120868589	COX6A1	positive	1.57388e-25	0.000604692
	cg01951459	chr2	236964187	AGAP1	positive	1.58914e-25	8.7839e-05
	cg13581394	chr3	126126646	CFAP100	positive	1.59534e-25	0.00185363
	cg16979095	chr17	49841729	CA10	positive	1.62047e-25	0.0191701
	cg14924300	chr1	181557439	CACNA1E	positive	1.62177e-25	0.0105903
	cg12664770	chr3	14642025	CCDC174	positive	1.64909e-25	0.00663436
	cg04470971	chr11	88797085	GRM5	positive	1.66458e-25	0.00116454
	cg12323528	chr20	56781279	PPP4R1L	positive	1.68096e-25	0.0102387
	cg26096776	chr14	68186675	RDH12	positive	1.68374e-25	2.43695e-09
	cg01080888	chr14	35949404	INSM2	positive	1.69505e-25	8.3294e-06
	cg17649516	chr6	1105578	LINC01622	positive	1.72086e-25	0.0254031
	cg23799952	chr7	127849335	MIR129-1	positive	1.74196e-25	0.0214019
	cg18590006	chr11	12495214	PARVA	positive	1.77001e-25	9.43173e-05
	cg22483275	chr2	233839631	NGEF	positive	1.79951e-25	8.71693e-05
	cg10195169	chr12	130590294	FZD10-AS1	positive	1.80626e-25	0.00225997
	cg14721515	chr1	163006568	RGS4	positive	1.8332e-25	0.00314944
	cg15612205	chr12	130516192	LINC02418	positive	1.86502e-25	0.00566639
	cg00417735	chr3	28070292	CMC1	positive	1.87752e-25	0.00595895
	cg11367853	chr5	38558340	LIFR	positive	1.88791e-25	0.0214043
	cg08448725	chr16	52582210	TOX3	positive	1.89174e-25	0.00557619
	cg16048517	chr5	11904442	CTNND2	positive	1.91352e-25	0.00159908
	cg02633371	chr17	35298618	LHX1	positive	1.92334e-25	0.0309049
	cg07918341	chr17	42992709	GFAP	positive	1.94211e-25	1.24226e-06
	cg18480328	chr11	1078195	MUC2	positive	1.9798e-25	0.0294832
	cg21161246	chr19	3233952	CELF5	positive	1.98319e-25	0.00246024
	cg20181251	chr11	46299000	CREB3L1	positive	1.98515e-25	0.000112442
	cg12503588	chr12	111251005	CCDC63	positive	2.00446e-25	0.0225249
	cg00150080	chr7	1447841	MICALL2	positive	2.0202e-25	0.000480586
	cg14888908	chr17	9694619	DHRS7C	positive	2.05794e-25	0.0476838
	cg23189583	chr22	21456568	BCRP2	positive	2.07115e-25	0.0185984
	cg09256941	chr16	20086891	GPR139	positive	2.07771e-25	9.9697e-05
	cg23416083	chr4	189167720	TRIML1	positive	2.0783e-25	0.0046582
	cg17131553	chr8	116676938	TRPS1	positive	2.07932e-25	0.0304077
	cg12597066	chr17	16473468	ZNF287	positive	2.1484e-25	0.000894618
	cg10484958	chr13	53424127	PCDH8	positive	2.15612e-25	0.0266973
	cg15179011	chr5	1247290	SLC6A18	positive	2.16381e-25	0.000292366
	cg05699304	chr1	17956219	ARHGEF10L	positive	2.17056e-25	0.00405049
	cg00753248	chr15	96891777	NR2F2	positive	2.19784e-25	1.36352e-05
	cg26064535	chr1	29138043	OPRD1	positive	2.21233e-25	0.0021427
	cg04295543	chr1	244080447	LINC02774	positive	2.22416e-25	0.00306025
	cg06686396	chr11	82026140	FAM181B	positive	2.26341e-25	0.0153945
	cg16871393	chr5	79287563	MTX3	positive	2.26477e-25	2.71031e-06
	cg14317285	chr3	181444870	SOX2-OT	positive	2.28439e-25	0.0412501
	cg01693519	chr3	181446790	SOX2-OT	positive	2.33225e-25	0.00987805
	cg01295318	chr8	35234678	UNC5D	positive	2.35777e-25	0.00513135
	cg09246203	chr3	114018592	TIGIT	positive	2.38849e-25	0.0437979
	cg14109482	chr9	138447782	PAEP	positive	2.38973e-25	0.0103286
	cg15748010	chr1	47223173	EFCAB14	positive	2.3925e-25	0.000152852
	cg23492625	chr7	1407363	MICALL2	positive	2.4251e-25	0.00295105
	cg04817801	chr10	133473805	LINC01164	positive	2.43409e-25	6.26737e-07
	cg14296254	chr7	104408810	LHFPL3	positive	2.44779e-25	0.00017156
	cg14119558	chr11	130298907	ADAMTS8	positive	2.45164e-25	0.0473055
	cg23097402	chr1	50883394	DMRTA2	positive	2.45646e-25	0.00937048
	cg23924570	chr14	58041827	SLC35F4	positive	2.53565e-25	0.000135679
	cg14210765	chr18	73628830	LOC339298	positive	2.54058e-25	2.08357e-05
	cg13443570	chr8	99098126	ERICH5	positive	2.6572e-25	0.020287
	cg03641724	chr14	60981646	SIX6	positive	2.71623e-25	0.00815045
	cg00481227	chr20	36322069	CTNNBL1	positive	2.78033e-25	0.0098509
	cg21694220	chr19	5460902	ZNRF4	positive	2.78522e-25	0.00710975
	cg09158588	chr5	155079973	SGCD	positive	2.90437e-25	0.0353015
	cg04079190	chr1	63420641	ATG4C	positive	2.93374e-25	0.000520593
	cg07120369	chr3	187388281	SST	positive	2.99567e-25	0.00884524
	cg18483549	chr17	30842946	MYO1D	negative	3.01807e-25	0.00175847
	cg15098087	chr6	168900493	SMOC2	positive	3.02466e-25	0.00259201
	cg20953187	chr3	45837898	SLC6A20	positive	3.03293e-25	0.00234562
	cg22831029	chr7	83325268	SEMA3E	positive	3.04583e-25	0.0248585
	cg25672398	chr1	22944795	EPHA8	positive	3.04879e-25	0.00405661
	cg04645160	chr15	96913183	NR2F2	positive	3.08345e-25	0.0193242
	cg25391724	chr1	241154755	RGS7	positive	3.09945e-25	0.000546724
	cg12988534	chr7	51384371	COBL	positive	3.19043e-25	0.031395
	cg12285989	chr2	157842934	GALNT5	positive	3.2408e-25	0.0117241
	cg05157921	chr15	25468674	SNORD115-10	positive	3.26749e-25	0.0151442
	cg06191260	chr18	48088362	MAPK4	positive	3.27061e-25	0.000316015
	cg25572904	chr13	113259983	TUBGCP3	positive	3.27762e-25	4.40705e-06
	cg24417499	chr1	33351653	HPCA	positive	3.29326e-25	0.0193053
	cg24864860	chr9	112239058	PTPN3	positive	3.33721e-25	0.0481013
	cg08498208	chr6	108445534	NR2E1	positive	3.35616e-25	0.0213226
	cg03104569	chr19	13615864	CACNA1A	positive	3.39586e-25	0.0128458
	cg11099362	chr12	127148020	LINC00944	positive	3.45258e-25	0.0051165
	cg11620409	chr11	61519687	MYRF	positive	3.48432e-25	0.000181441
	cg22005677	chr3	188374040	LPP	negative	3.49481e-25	0.000210059
	cg03926898	chr19	10110898	COL5A3	positive	3.57622e-25	0.000880253
	cg23294140	chr18	4264613	DLGAP1-AS5	positive	3.61343e-25	4.31002e-05
	cg06610376	chr4	154712902	SFRP2	positive	3.64593e-25	0.0052769
	cg23370512	chr11	61334385	SYT7	positive	3.74751e-25	0.0121975
	cg03419058	chr15	26108391	ATP10A	positive	3.76408e-25	0.000144312
	cg18587806	chr4	41362843	LIMCH1	positive	3.83606e-25	0.0070175
	cg27195771	chr12	108605281	WSCD2	positive	3.9131e-25	0.0198262
	cg24254206	chr19	46196934	QPCTL	positive	3.98366e-25	0.00101909
	cg06742021	chr5	2659108	IRX2	positive	3.99959e-25	0.00413612
	cg02890444	chr19	5470525	ZNRF4	positive	4.08338e-25	0.0124528
	cg24527382	chr2	49631579	FSHR	positive	4.12915e-25	0.000904845
	cg04492193	chr4	8135668	ABLIM2	positive	4.18564e-25	0.00108488
	cg25180885	chr1	181595827	CACNA1E	positive	4.18996e-25	0.00029765
	cg22118521	chr5	50482124	ISL1-DT	positive	4.21795e-25	6.33449e-06
	cg00397910	chr8	80522577	STMN2	positive	4.22928e-25	0.00280186
	cg13001240	chr17	21453925	LINC02693	positive	4.25387e-25	0.0464239
	cg01763890	chr5	76936793	OTP	positive	4.27758e-25	0.00463666
	cg06065125	chr4	85402870	NKX6-1	positive	4.32698e-25	0.0366436
	cg05414135	chr8	56238612	XKR4	positive	4.33258e-25	0.00776811
	cg15246712	chr8	25815496	PPP2R2A	positive	4.35654e-25	1.32722e-05
	cg15909232	chr7	156235420	LOC285889	positive	4.39915e-25	0.00357945
	cg15764067	chr13	28374053	GSX1	positive	4.4678e-25	0.00071356
	cg16838957	chr3	123038798	ADCY5	positive	4.47158e-25	0.0344867
	cg16184943	chr22	22863293	ZNF280B	positive	4.4941e-25	0.0023768
	cg27016549	chr11	131779859	NTM	positive	4.51725e-25	0.0191134
	cg21293933	chr20	42539946	TOX2	positive	4.54905e-25	5.64341e-07
	cg19034506	chr5	63525307	RNF180	positive	4.6397e-25	0.0477838
	cg09326123	chr19	4167842	CREB3L3	positive	4.70373e-25	0.00467821
	cg01775559	chr11	126431522	KIRREL3	positive	4.72695e-25	0.00170611
	cg02726501	chr19	54415925	CACNG7	positive	4.73328e-25	8.17808e-05
	cg06617456	chr8	68864769	PREX2	positive	4.75305e-25	0.00664308
	cg00445126	chr2	63276010	EHBP1-AS1	positive	4.8201e-25	0.002998
	cg04172237	chr13	95355281	SOX21	positive	4.96277e-25	0.00513797
	cg07303450	chr16	30023400	SLX1B-SULT1A4	positive	5.01013e-25	0.000176684
	cg04363703	chr19	47975694	SLC8A2	positive	5.10043e-25	0.0196634
	cg27186323	chr7	1440324	MICALL2	positive	5.14856e-25	0.00352279
	cg23033691	chr11	66185611	NPAS4	positive	5.17576e-25	5.18295e-06
	cg04002804	chr19	31909160	TSHZ3	positive	5.17705e-25	0.00418313
	cg24075591	chr2	238323305	COL6A3	positive	5.21077e-25	0.000278532
	cg22034047	chr10	87975265	GRID1	positive	5.28742e-25	0.0493298
	cg25829666	chr3	24536880	THRB-AS1	positive	5.31047e-25	0.0268748
	cg26134895	chr5	15500270	FBXL7	positive	5.32243e-25	0.0397951
	cg10837142	chr10	121765342	MIR4682	positive	5.32375e-25	0.0403302
	cg15171154	chr3	30722557	TGFBR2	negative	5.32571e-25	0.0248825
	cg17434908	chr1	240484183	FMN2	positive	5.37213e-25	1.25512e-05
	cg24149247	chr12	45268163	NELL2	positive	5.46288e-25	5.22298e-05
	cg09633881	chr9	33002021	APTX	positive	5.52006e-25	0.0489021
	cg19628299	chr6	168840641	SMOC2	positive	5.52391e-25	0.0048783
	cg09760387	chr17	28705147	CPD	positive	5.65936e-25	0.00343515
	cg24886356	chr5	176300261	UNC5A	positive	5.66512e-25	1.72771e-05
	cg10912053	chr1	64239781	ROR1	positive	5.70412e-25	0.00107056
	cg27153155	chr6	100901804	SIM1	positive	5.73272e-25	0.0364974
	cg12039970	chr5	2006146	IRX4	positive	5.89571e-25	0.000516874
	cg12094222	chr5	37886857	GDNF-AS1	positive	5.90203e-25	5.24645e-05
	cg13029847	chr17	27333273	SEZ6	positive	5.94909e-25	0.0415663
	cg15690342	chr5	72594851	TMEM174	positive	6.06678e-25	0.00188378
	cg23302682	chr6	166580952	TBXT	positive	6.10175e-25	0.0349119
	cg10243278	chr14	57277205	OTX2	positive	6.26092e-25	0.00208494
	cg26114570	chr1	9648299	TMEM201	positive	6.26978e-25	0.00144506
	cg21880328	chr7	117514017	CTTNBP2	positive	6.3333e-25	8.46841e-06
	cg10230831	chr13	35487202	NBEA	positive	6.37271e-25	0.00184309
	cg06945627	chr5	35861023	IL7R	negative	6.42821e-25	0.0164182
	cg15367892	chr10	119297716	EMX2OS	positive	6.45275e-25	0.000907473
	cg03951374	chr15	37390176	MEIS2	positive	6.56035e-25	0.00438464
	cg00447940	chr15	88852743	NTRK3-AS1	positive	6.6141e-25	0.00206404
	cg12830377	chr15	23814869	MKRN3	positive	6.73373e-25	0.0212967
	cg10446546	chr11	72386085	PDE2A	positive	6.73756e-25	0.00020871
	cg06957802	chr17	32979387	TMEM132E	positive	6.78211e-25	5.15384e-05
	cg18776766	chr3	62590119	CADPS	positive	6.84891e-25	6.18679e-05
	cg03106024	chr11	17733706	MYOD1	positive	6.86049e-25	0.0274332
	cg18299299	chr12	99289825	ANKS1B	positive	6.87112e-25	6.10725e-07
	cg04755582	chr12	53153577	KRT76	positive	6.88507e-25	0.0089321
	cg16804670	chr10	119501345	EMX2	positive	6.90398e-25	0.00164831
	cg03184290	chr4	111550666	PITX2	positive	6.91412e-25	0.0174668
	cg14086396	chr5	140479263	PCDHB3	positive	7.08066e-25	0.0154465
	cg18964609	chr2	119768968	MARCO	positive	7.2924e-25	1.10838e-05
	cg19685709	chr12	119208234	SRRM4	positive	7.67313e-25	0.000276858
	cg17210004	chr17	63512677	AXIN2	positive	7.72131e-25	0.0149125
	cg09940915	chr1	22925447	EPHA8	positive	7.72154e-25	0.00807031
	cg24824071	chr1	110671194	UBL4B	positive	7.72596e-25	0.00174199
	cg04171425	chr16	4654740	UBALD1	positive	7.73171e-25	0.0141078
	cg04176995	chr6	30586468	HLA-DRB5	positive	7.79714e-25	0.00109647
	cg26946042	chr4	46650206	COX7B2	positive	7.97664e-25	0.00516138
	cg25073700	chr7	157628207	PTPRN2	positive	8.1721e-25	0.0237522
	cg22530462	chr1	237209586	RYR2	positive	8.25301e-25	0.00631271
	cg11880367	chr10	80141181	LINC00856	positive	8.35505e-25	0.0127228
	cg19836549	chr7	51798400	COBL	positive	8.54692e-25	0.0176051
	cg18343474	chr1	229566908	ACTA1	positive	8.67296e-25	0.00976357
	cg06583576	chr3	147073118	ZIC4	positive	8.69991e-25	0.0224414
	cg14930884	chr8	65488640	LOC401463	positive	8.7536e-25	0.00806961
	cg08988420	chr4	186435488	PDLIM3	positive	8.75657e-25	0.0190514
	cg04626292	chr6	85072328	CEP162	positive	8.97613e-25	0.00158491
	cg00189315	chr12	117889996	KSR2	positive	9.01271e-25	0.000202719
	cg22010340	chr1	16083782	FBLIM1	positive	9.04839e-25	0.00238034
	cg20019489	chr20	57414351	GNAS-AS1	positive	9.07129e-25	0.0138588
	cg16698814	chr19	51524763	KLK11	positive	9.13716e-25	0.00139979
	cg27252696	chr6	100912940	SIM1	positive	9.21246e-25	1.29744e-05
	cg03071098	chr2	19554237	OSR1	positive	9.49824e-25	0.00046566
	cg08887742	chr3	147132321	ZIC1	positive	9.55666e-25	0.0196957
	cg07402939	chr13	112927331	SPACA7	positive	9.60672e-25	0.000303082
	cg16397362	chr10	118511647	HSPA12A	positive	9.81026e-25	1.51335e-06
	cg08665772	chr1	160051377	KCNJ9	positive	9.83796e-25	0.00122844
	cg22107476	chr7	2442660	CHST12	positive	9.86664e-25	0.017433
	cg24344037	chr10	133040570	TCERG1L	positive	9.98171e-25	0.0232034
	cg12110980	chr11	720454	EPS8L2	positive	1.01506e-24	0.00264986
	cg06889422	chr22	24627294	GGT5	positive	1.0182e-24	0.00322051
	cg15128254	chr12	58422374	ATP23	positive	1.03166e-24	0.00719799
	cg13890558	chr1	37417183	GRIK3	positive	1.05281e-24	0.0173152
	cg11472521	chr17	48050512	DLX4	positive	1.06147e-24	0.000129278
	cg07576632	chr6	168844079	SMOC2	positive	1.06544e-24	6.79396e-06
	cg07534945	chr7	100819944	NAT16	positive	1.08012e-24	0.0245192
	cg14808158	chr10	128219959	C10orf90	positive	1.0815e-24	0.00209987
	cg05721349	chr7	149547232	ZNF862	negative	1.08287e-24	0.0473159
	cg20806345	chr2	182543706	CERKL	positive	1.10503e-24	1.99994e-05
	cg15365265	chr1	29817101	PTPRU	positive	1.13866e-24	0.00483313
	cg11404058	chr5	14011843	DNAH5	positive	1.14112e-24	0.000996091
	cg19241744	chr10	73078790	SLC29A3	positive	1.17616e-24	0.035017
	cg08538468	chr9	17579028	SH3GL2	positive	1.18416e-24	0.00171567
	cg25752087	chr17	12523042	LINC00670	positive	1.18918e-24	0.000900166
	cg26769081	chr4	183133446	TENM3	positive	1.18924e-24	0.0132628
	cg26454433	chr2	237084695	GBX2	positive	1.19562e-24	0.0104058
	cg26015456	chr7	154634557	DPP6	positive	1.20225e-24	0.0367136
	cg00598018	chr11	126525828	KIRREL3	positive	1.21366e-24	0.0118961
	cg01987925	chr5	146461045	PPP2R2B	positive	1.21696e-24	0.000784404
	cg07125503	chr6	84994339	CEP162	positive	1.24518e-24	0.0040166
	cg24124470	chr11	66181759	NPAS4	positive	1.25672e-24	0.000103857
	cg11751989	chr2	567108	TMEM18	positive	1.25769e-24	0.00931455
	cg06059616	chr8	109092720	RSPO2	positive	1.272e-24	8.44188e-05
	cg06279113	chr2	19559564	OSR1	positive	1.28498e-24	0.00100705
	cg20004315	chr12	47985234	RPAP3	positive	1.29132e-24	0.0395335
	cg04214626	chr11	129233721	BARX2	positive	1.30127e-24	0.00220083
	cg11515438	chr19	51538486	KLK12	positive	1.32087e-24	0.00199221
	cg08158862	chr1	200012526	NR5A2	positive	1.33196e-24	8.85623e-07
	cg19857761	chr5	1174522	SLC6A19	positive	1.34023e-24	0.0064583
	cg22073838	chr11	101982817	YAP1	positive	1.35059e-24	0.000246108
	cg24390913	chr10	118899788	VAX1	positive	1.35799e-24	0.00748952
	cg01706399	chr20	21621456	PAX1	positive	1.37026e-24	0.0122701
	cg11173148	chr7	157724162	PTPRN2	positive	1.38941e-24	4.75274e-05
	cg17098412	chr2	180421490	ZNF385B	positive	1.39059e-24	0.00744441
	cg02536916	chr3	139028922	MRPS22	positive	1.39397e-24	0.00141273
	cg14012726	chr1	37522341	GRIK3	positive	1.39905e-24	0.00864398
	cg25026529	chr1	91183051	BARHL2	positive	1.40361e-24	0.00061517
	cg21204606	chr19	19322527	NCAN	positive	1.40925e-24	0.0283926
	cg03283080	chr6	1309779	FOXQ1	positive	1.44677e-24	0.026295
	cg21043070	chr8	34981089	UNC5D	positive	1.4746e-24	0.00703232
	cg00002350	chr2	38657543	ATL2	positive	1.48036e-24	0.00848201
	cg12199972	chr1	918526	PERM1	positive	1.4996e-24	0.000621821
	cg07723251	chr17	50237742	CA10	positive	1.5021e-24	0.0188026
	cg18143243	chr3	54155663	CACNA2D3	positive	1.54715e-24	9.91333e-05
	cg15241074	chr2	12860614	TRIB2	positive	1.54933e-24	0.0473514
	cg26067259	chr5	92927796	NR2F1	positive	1.57244e-24	0.00688415
	cg21719704	chr19	55948588	SHISA7	positive	1.58171e-24	0.00481973
	cg15640408	chr7	100656183	MUC12	positive	1.58574e-24	0.00769475
	cg01299216	chr1	20803521	CAMK2N1	positive	1.59146e-24	0.0221073
	cg08908987	chr8	10589905	SOX7	positive	1.59635e-24	0.0153537
	cg23978841	chr12	110049549	MVK	positive	1.62712e-24	0.00174964
	cg11723960	chr16	6172597	RBFOX1	positive	1.64377e-24	0.0138839
	cg00114478	chr8	73658110	KCNB2	positive	1.65537e-24	0.000353815
	cg26299148	chr15	41522672	EXD1	positive	1.66043e-24	0.000313395
	cg12667206	chr8	40706575	ZMAT4	positive	1.67689e-24	0.000969382
	cg06691129	chr18	19688889	GATA6-AS1	positive	1.68605e-24	0.0477608
	cg00733417	chr2	103458009	TMEM182	positive	1.6861e-24	0.0158436
	cg00135293	chr6	102088363	GRIK2	positive	1.70313e-24	0.0200574
	cg01566965	chr4	174447847	HAND2	positive	1.73258e-24	0.00866374
	cg15411403	chr5	92922043	NR2F1	positive	1.74299e-24	0.0114514
	cg08550407	chr19	15724798	CYP4F8	positive	1.74996e-24	0.00963688
	cg07695429	chr19	5349141	PTPRS	positive	1.75101e-24	0.01732
	cg14375461	chr9	135458625	BARHL1	positive	1.75154e-24	0.0168377
	cg12971344	chr4	109056350	LEF1	negative	1.78536e-24	0.014532
	cg17763019	chr5	140593332	PCDHB13	positive	1.82671e-24	0.00599472
	cg12265810	chr19	45975694	ERCC1	positive	1.8392e-24	0.00180012
	cg11141718	chr14	96382052	TUNAR	positive	1.84393e-24	3.46496e-05
	cg16574155	chr1	27287468	KDF1	positive	1.84948e-24	0.00117142
	cg13981360	chr15	78113237	GOLGA6FP	positive	1.85717e-24	0.0195544
	cg03716227	chr1	51810983	TTC39A	positive	1.881e-24	1.5591e-05
	cg06779929	chr8	143230875	MIR4472-1	positive	1.88186e-24	0.0231506
	cg03292921	chr4	575111	PIGG	positive	1.89522e-24	0.0215349
	cg01600788	chr16	23265839	SCNN1G	positive	1.91163e-24	0.00296433
	cg06052716	chr7	1280607	UNCX	positive	1.92792e-24	0.00289349
	cg14094960	chr7	55086890	EGFR	positive	1.9335e-24	0.00124416
	cg17561500	chr7	4512658	FOXK1	positive	1.98906e-24	0.00322633
	cg27637940	chr5	63985374	SHISAL2B	positive	1.98988e-24	0.010435
	cg19820328	chr10	125332630	GPR26	positive	2.00977e-24	0.00293883
	cg26842239	chr16	89324756	ANKRD11	positive	2.03292e-24	0.0376119
	cg00754742	chr5	532951	MIR4456	positive	2.03762e-24	0.000443776
	cg04202887	chr19	8399076	KANK3	positive	2.06119e-24	0.0150363
	cg06710672	chr16	1133378	SSTR5	positive	2.07981e-24	0.000100919
	cg26802289	chr7	20817859	SP8	positive	2.10539e-24	1.03489e-06
	cg00210562	chr15	89914046	MIR9-3HG	positive	2.1197e-24	0.00906651
	cg08280517	chr4	26175406	RBPJ	positive	2.13833e-24	0.00812333
	cg06828415	chr11	68736485	MRGPRD	positive	2.14426e-24	0.000149431
	cg19221959	chr7	94537347	PPP1R9A	positive	2.15158e-24	0.0255468
	cg20639396	chr6	128839906	PTPRK	positive	2.17058e-24	0.00719509
	cg10272534	chr16	23192711	SCNN1G	positive	2.18809e-24	0.000444505
	cg07158797	chr1	215740701	KCTD3	positive	2.22544e-24	0.000786757
	cg09234672	chr16	51187750	SALL1	positive	2.22862e-24	0.000925292
	cg05713079	chr4	25665545	SLC34A2	positive	2.2432e-24	0.00138779
	cg04516203	chr16	51442575	SALL1	positive	2.24834e-24	0.00875527
	cg01882260	chr3	164909748	SLITRK3	positive	2.27567e-24	0.0290569
	cg07336438	chr16	1131466	SSTR5	positive	2.29109e-24	0.0169394
	cg12194898	chr5	174145508	MSX2	positive	2.31039e-24	0.0109797
	cg20137551	chr5	92500675	NR2F1-AS1	positive	2.34106e-24	0.000493013
	cg20695175	chr11	134556096	B3GAT1-DT	positive	2.36679e-24	0.0116819
	cg27380292	chr13	20964888	CRYL1	positive	2.38116e-24	0.00515059
	cg26885220	chr1	65775570	DNAJC6	positive	2.39168e-24	0.00711998
	cg01906944	chr20	45439769	SLC2A10	positive	2.40422e-24	0.0080056
	cg08068296	chr16	83842404	HSBP1	positive	2.41143e-24	0.00286453
	cg04440885	chr16	51146856	SALL1	positive	2.45418e-24	0.0107744
	cg14242680	chr10	104004787	GBF1	positive	2.47431e-24	0.035072
	cg10375078	chr10	22624374	COMMD3-BMI1	positive	2.48727e-24	0.00726412
	cg23943125	chr5	44048305	FGF10	positive	2.50543e-24	0.00974453
	cg03754708	chr10	134604989	NKX6-2	positive	2.50601e-24	0.00121771
	cg26994023	chr5	153418932	MFAP3	positive	2.50799e-24	0.0153487
	cg00247334	chr3	8811543	OXTR	positive	2.55738e-24	0.000838701
	cg02485597	chr17	35291560	LHX1	positive	2.59299e-24	0.0002186
	cg09624366	chr6	145536314	UTRN	positive	2.6066e-24	0.00570147
	cg25750999	chr16	20364660	UMOD	positive	2.63014e-24	0.00010345
	cg12798259	chr11	31823282	PAX6	positive	2.66405e-24	0.0173199
	cg01286665	chr5	54525925	CCNO	positive	2.6822e-24	0.00176941
	cg11304212	chr6	34759018	UHRF1BP1	positive	2.7301e-24	0.0259538
	cg04662532	chr12	54330125	HOXC13-AS	positive	2.75738e-24	0.00251985
	cg21859781	chr8	97173034	GDF6	positive	2.76716e-24	3.32731e-05
	cg05650260	chr6	50692762	TFAP2D	positive	2.78897e-24	0.00308009
	cg02464866	chr16	86714536	FOXL1	positive	2.81626e-24	0.00934722
	cg06192405	chr1	37331998	GRIK3	positive	2.86736e-24	0.00485105
	cg26285612	chr1	242136156	MAP1LC3C	positive	2.89219e-24	0.00039493
	cg01709689	chr7	1452073	MICALL2	positive	2.89343e-24	0.00125143
	cg05578840	chr5	76934327	OTP	positive	2.89373e-24	0.0350101
	cg01562635	chr14	63596159	KCNH5	positive	2.91771e-24	0.000199496
	cg04732087	chr1	240760677	GREM2	positive	2.9543e-24	0.0241438
	cg01472311	chr1	230871352	CAPN9	positive	2.9602e-24	0.000351784
	cg22163856	chr3	126877786	PLXNA1	positive	2.97015e-24	0.000314463
	cg03883331	chr1	244217328	ZBTB18	negative	2.99227e-24	0.0129404
	cg03693203	chr12	114014926	LHX5	positive	3.00006e-24	0.00432176
	cg09364022	chr11	132115876	NTM	positive	3.04396e-24	0.00101296
	cg18948399	chr2	207507643	FAM237A	positive	3.04458e-24	0.0413902
	cg26645834	chr20	55904875	SPO11	positive	3.04658e-24	9.63534e-06
	cg04425920	chr10	50604518	NA	positive	3.06546e-24	6.79292e-05
	cg05017851	chr1	14917390	KAZN	positive	3.07666e-24	0.000852212
	cg12280901	chr6	28501816	GPX6	positive	3.08103e-24	9.29322e-05
	cg13685330	chr3	142719437	LOC100289361	positive	3.09138e-24	4.88909e-05
	cg17864777	chr5	55777806	ANKRD55	positive	3.11059e-24	3.58593e-05
	cg05782445	chr2	26915207	KCNK3	positive	3.12604e-24	6.96279e-06
	cg10086741	chr16	73704984	LINC01568	positive	3.13085e-24	0.0121138
	cg26710996	chr16	46590907	ANKRD26P1	positive	3.15389e-24	0.0138496
	cg17112089	chr7	117513348	CTTNBP2	positive	3.15566e-24	0.0398549
	cg14528125	chr1	214105231	LINC00538	positive	3.1796e-24	0.00074814
	cg19659678	chr16	86275589	LINC02135	positive	3.19561e-24	0.000495625
	cg21908488	chr17	17991580	DRG2	positive	3.22162e-24	0.00691745
	cg08935526	chr4	25030010	LGI2	positive	3.22417e-24	0.00159417
	cg25942450	chr5	170736251	TLX3	positive	3.23698e-24	0.00586432
	cg14259556	chr13	100630170	ZIC2	positive	3.24152e-24	0.00118739
	cg07851675	chr5	2755540	C5orf38	positive	3.28967e-24	0.000263292
	cg23157363	chr19	14170064	PALM3	positive	3.32195e-24	0.00654483
	cg23524537	chr14	95036219	SERPINA4	positive	3.33165e-24	4.27405e-07
	cg05587648	chr19	4151818	CREB3L3	positive	3.38221e-24	0.0125268
	cg23326689	chr8	80523461	STMN2	positive	3.38918e-24	0.00160806
	cg00179374	chr7	132259150	PLXNA4	positive	3.39083e-24	0.00528853
	cg08002883	chr3	192127457	FGF12	positive	3.39881e-24	0.000404579
	cg19178091	chr17	704245	NXN	positive	3.40293e-24	0.0131331
	cg24358144	chr2	22600431	LINC01822	positive	3.40789e-24	0.000416984
	cg03409895	chr4	175143752	FBXO8	positive	3.44236e-24	0.000185939
	cg18125883	chr19	10196293	SHFL	positive	3.45886e-24	0.000147252
	cg20083442	chr8	73600575	KCNB2	positive	3.47214e-24	0.00271041
	cg08266655	chr19	4769001	MIR7-3HG	positive	3.49039e-24	0.00805785
	cg07336617	chr5	76935080	OTP	positive	3.49406e-24	0.000315955
	cg01800815	chr8	135952194	MIR30D	positive	3.52659e-24	0.00366269
	cg14570348	chr19	3877773	ATCAY	positive	3.54211e-24	0.00108161
	cg19503327	chr11	12726182	TEAD1	positive	3.54681e-24	0.00118569
	cg06827397	chr11	131293681	NTM	positive	3.57646e-24	0.00115033
	cg21165252	chr10	23455880	PTF1A	positive	3.57713e-24	0.0050985
	cg07658357	chr12	114839476	TBX5	positive	3.6038e-24	0.000600035
	cg22073025	chr3	147036868	ZIC4	positive	3.65469e-24	0.000326397
	cg02600430	chr13	100623942	ZIC5	positive	3.66393e-24	0.00114471
	cg16754374	chr1	50513443	ELAVL4	positive	3.66535e-24	0.0247139
	cg16079364	chr10	103532798	FGF8	positive	3.68529e-24	0.00457547
	cg17880622	chr18	31158831	ASXL3	positive	3.70567e-24	3.18625e-05
	cg09086964	chr15	73689509	HCN4	positive	3.76898e-24	0.0217789
	cg26252343	chr16	47921516	PHKB	positive	3.77256e-24	0.000527062
	cg25184724	chr7	31026679	GHRHR	positive	3.77598e-24	0.00228467
	cg19184420	chr20	34960426	DLGAP4	positive	3.8014e-24	0.00528629
	cg10121113	chr8	20112959	LZTS1	positive	3.82549e-24	0.00772645
	cg14206523	chr15	35017944	GJD2	positive	3.82604e-24	0.0080152
	cg26176246	chr4	25657893	SLC34A2	positive	3.85969e-24	0.00746642
	cg16253465	chr4	177954517	VEGFC	positive	3.89494e-24	0.000740781
	cg12333479	chr19	29575302	LINC01532	positive	3.91623e-24	8.17468e-06
	cg11232953	chr5	15704094	FBXL7	positive	3.97221e-24	0.0056395
	cg09550945	chr16	86806068	FOXL1	positive	3.98507e-24	0.00324836
	cg24798603	chr12	110010952	MMAB	positive	4.02109e-24	0.0461317
	cg14763096	chr10	95954251	PLCE1	positive	4.02555e-24	0.00375314
	cg02415341	chr10	135146439	PRAP1	positive	4.13407e-24	1.32447e-05
	cg08889250	chr9	847030	DMRT1	positive	4.15893e-24	0.000100842
	cg27066385	chr11	133236166	OPCML	positive	4.18982e-24	0.00192545
	cg04339170	chr16	8589200	TMEM114	positive	4.19926e-24	0.0302678
	cg04538816	chr11	47471453	RAPSN	positive	4.2033e-24	0.00910558
	cg13552869	chr16	29909924	SLX1B-SULT1A4	positive	4.28283e-24	0.00123946
	cg25490383	chr2	79681227	CTNNA2	positive	4.2978e-24	0.000182151
	cg22300737	chr12	107025132	LOC100287944	positive	4.31062e-24	0.0192246
	cg06719901	chr3	117329281	TUSC7	positive	4.32469e-24	0.0136693
	cg14178173	chr7	157495532	PTPRN2	positive	4.36411e-24	0.000145741
	cg07277296	chr12	117932869	KSR2	positive	4.39182e-24	0.00650797
	cg11324534	chr13	100740707	PCCA	positive	4.44113e-24	0.0185896
	cg19134374	chr14	58862337	TOMM20L	positive	4.45563e-24	0.0281888
	cg14640367	chr5	1660156	PDCD6P1	positive	4.46627e-24	0.000353436
	cg00495860	chr21	38065524	SIM2	positive	4.47336e-24	0.0029755
	cg24181384	chr7	155302908	CNPY1	positive	4.50563e-24	0.00384654
	cg00308503	chr5	160171384	ATP10B	positive	4.52184e-24	0.00237486
	cg03814786	chr2	154057860	RPRM	positive	4.60285e-24	0.0386624
	cg17782713	chr10	22613360	COMMD3-BMI1	positive	4.60653e-24	1.78571e-06
	cg15507719	chr18	34837160	CELF4	positive	4.63308e-24	0.00315712
	cg02526537	chr8	49033761	UBE2V2	positive	4.64676e-24	0.0118786
	cg05039893	chr12	119828513	CCDC60	positive	4.64969e-24	0.0202658
	cg16901123	chr12	125798726	TMEM132B	positive	4.68751e-24	0.00143681
	cg15235945	chr12	118884161	SUDS3	positive	4.68957e-24	0.00261072
	cg25027699	chr12	101187093	ANO4	positive	4.69061e-24	4.3094e-05
	cg12040830	chr11	112833773	NCAM1	positive	4.72961e-24	0.00118857
	cg16620673	chr13	19979258	TPTE2	positive	4.73947e-24	0.00293539
	cg04684516	chr5	121647858	SNCAIP	positive	4.87014e-24	0.000327044
	cg21039708	chr14	57278729	OTX2-AS1	positive	4.91745e-24	0.0102792
	cg19568115	chr14	70830156	SYNJ2BP-COX16	positive	4.93213e-24	0.0303023
	cg18314017	chr10	102789993	PDZD7	positive	4.95041e-24	0.011767
	cg22372131	chr6	30956603	HLA-DRB5	positive	4.97106e-24	0.0422744
	cg20973720	chr15	79383167	RASGRF1	positive	5.01988e-24	0.0374578
	cg09276363	chr1	112531488	KCND3	positive	5.0604e-24	0.0072953
	cg03320250	chr22	40367426	GRAP2	positive	5.09352e-24	0.0183577
	cg15210999	chr6	15663538	DTNBP1	positive	5.11629e-24	0.0389204
	cg20212912	chr4	147557774	POU4F2	positive	5.15457e-24	0.0186522
	cg01637009	chr19	49017426	LMTK3	positive	5.21231e-24	0.00738701
	cg23574215	chr20	30555351	XKR7	positive	5.26177e-24	0.0214858
	cg22353329	chr17	77814357	CBX4	positive	5.27374e-24	9.71896e-05
	cg16317164	chr12	17642527	MIR3974	positive	5.28478e-24	0.00949879
	cg19638860	chr5	7094830	MIR4454	positive	5.33069e-24	0.0375398
	cg17454318	chr8	26713593	ADRA1A	positive	5.38109e-24	2.25743e-05
	cg25661980	chr4	148369008	EDNRA	positive	5.49771e-24	9.88104e-06
	cg05201390	chr5	153865895	HAND1	positive	5.5449e-24	0.00690618
	cg06482830	chr16	1186203	CACNA1H	positive	5.60777e-24	0.00644238
	cg23619399	chr13	79169753	OBI1-AS1	positive	5.61247e-24	0.000911376
	cg17075913	chr17	78444608	NPTX1	positive	5.71197e-24	6.76523e-05
	cg05073130	chr7	150715634	ATG9B	positive	5.75284e-24	0.0116087
	cg00289546	chr2	211089678	ACADL	positive	5.77549e-24	0.00199225
	cg25314559	chr15	24123517	NDN	positive	5.8118e-24	0.0162632
	cg00910115	chr9	34620794	DCTN3	positive	5.86415e-24	0.000754151
	cg23493018	chr8	37309823	ZNF703	positive	5.94357e-24	0.00371055
	cg18340564	chr19	51550458	KLK13	positive	5.95031e-24	0.00250304
	cg24928391	chr8	55370336	SOX17	positive	6.108e-24	0.0275158
	cg14243623	chr9	90341158	CTSL	positive	6.12371e-24	0.0160639
	cg21679625	chr2	219905325	CFAP65	positive	6.17535e-24	0.0246404
	cg26252794	chr14	88097221	GALC	positive	6.20301e-24	0.0483119
	cg01495995	chr16	86355413	LINC00917	positive	6.29032e-24	0.0141547
	cg27103043	chr8	10860172	XKR6	positive	6.29208e-24	0.0455389
	cg04560225	chr1	91195336	BARHL2	positive	6.30589e-24	1.47663e-06
	cg10573505	chr1	181454164	CACNA1E	positive	6.3917e-24	0.0127576
	cg13720865	chr9	138672837	KCNT1	positive	6.39683e-24	0.00965973
	cg01599971	chr1	157933894	KIRREL1	positive	6.40277e-24	0.0155932
	cg18743730	chr17	58226981	CA4	positive	6.44044e-24	0.00861176
	cg11824121	chr1	17885510	ARHGEF10L	positive	6.5746e-24	3.65076e-05
	cg20687414	chr3	44155764	MIR138-1	positive	6.58733e-24	0.00162198
	cg00010946	chr3	157819282	SHOX2	positive	6.69333e-24	0.0139663
	cg04778212	chr9	103790434	PLPPR1	positive	6.78136e-24	0.011748
	cg07146567	chr20	55898248	MIR4325	positive	6.80969e-24	0.000149608
	cg12415569	chr12	322831	SLC6A12	positive	6.8952e-24	0.00399369
	cg04799798	chr1	14421863	PRDM2	positive	6.92026e-24	7.45671e-06
	cg07260221	chr4	158142677	GRIA2	positive	6.94961e-24	0.012764
	cg15184685	chr15	66286777	MEGF11	positive	7.05585e-24	0.031127
	cg16893574	chr16	71392095	CALB2	positive	7.20077e-24	0.0264671
	cg27569863	chr18	73627887	LOC339298	positive	7.23635e-24	0.00760864
	cg18485844	chr11	2291652	ASCL2	positive	7.25556e-24	0.012086
	cg01453281	chr2	105475049	POU3F3	positive	7.29046e-24	0.000341555
	cg09716807	chr5	574169	CEP72-DT	positive	7.29769e-24	0.0164608
	cg17924795	chr1	153163132	LELP1	positive	7.31409e-24	0.000789571
	cg25769889	chr18	28620915	DSC3	positive	7.34532e-24	0.0178188
	cg14891491	chr4	108164972	DKK2	positive	7.49494e-24	0.0439853
	cg25621630	chr8	71731375	XKR9	positive	7.55553e-24	0.000398032
	cg24014236	chr9	17579045	SH3GL2	positive	7.58458e-24	6.51627e-05
	cg05812171	chr11	100557958	ARHGAP42	positive	7.75136e-24	0.0266752
	cg25566237	chr16	13151078	SHISA9	positive	7.75924e-24	0.00300975
	cg04707956	chr21	43186518	RIPK4	positive	7.92888e-24	0.00465857
	cg23234832	chr3	24536323	THRB-AS1	positive	7.9326e-24	0.00626888
	cg04919596	chr1	996054	AGRN	positive	7.95961e-24	0.00770271
	cg15502740	chr7	154863937	HTR5A	positive	7.97576e-24	6.49167e-06
	cg03259703	chr1	18432992	IGSF21	positive	8.08225e-24	0.00753983
	cg01292375	chr2	190986846	C2orf88	positive	8.16889e-24	1.32411e-05
	cg24783648	chr10	72663366	PCBD1	positive	8.18278e-24	0.0139541
	cg15059558	chr13	112729515	SOX1	positive	8.21486e-24	0.0358808
	cg03792653	chr20	36661448	TTI1	positive	8.21941e-24	0.0219156
	cg23953697	chr5	140306208	PCDHA13	positive	8.27612e-24	0.000828341
	cg12064276	chr13	79182205	OBI1-AS1	positive	8.34707e-24	0.00373652
	cg13692446	chr13	112759719	SOX1	positive	8.39242e-24	0.00144025
	cg14036830	chr19	42503207	GRIK5	positive	8.45139e-24	1.18842e-05
	cg03106056	chr2	217237937	MARCHF4	positive	8.45541e-24	0.00314263
	cg08364561	chr11	31846844	PAX6-AS1	positive	8.89809e-24	0.000865836
	cg10048436	chr13	113862143	PCID2	positive	8.97205e-24	0.00143271
	cg05036656	chr4	41875470	TMEM33	positive	9.01128e-24	0.00158498
	cg10655471	chr19	41025339	SPTBN4	positive	9.04112e-24	0.00581654
	cg25091367	chr4	7289507	SORCS2	positive	9.1056e-24	7.08131e-07
	cg27266176	chr14	65170689	PLEKHG3	positive	9.18156e-24	0.0145587
	cg04457114	chr5	174159705	MSX2	positive	9.2498e-24	0.00670134
	cg03800253	chr12	132840586	GALNT9	positive	9.27347e-24	0.0463907
	cg10126991	chr15	78001745	LINGO1	positive	9.28899e-24	0.00168451
	cg13207658	chr17	77187804	RBFOX3	positive	9.33581e-24	0.00486426
	cg27409926	chr13	25254138	ATP12A	positive	9.35254e-24	0.00873654
	cg13154925	chr8	41158676	SFRP1	positive	9.40918e-24	0.00809859
	cg13446474	chr9	14349430	NFIB	positive	9.41903e-24	0.00912447
	cg13819659	chr16	64472071	CDH11	positive	9.44201e-24	3.12119e-05
	cg13536757	chr2	185463583	ZNF804A	positive	9.52698e-24	0.0106396
	cg11164088	chr19	51198528	SHANK1	positive	9.55038e-24	0.0423894
	cg21800232	chr5	79866368	ANKRD34B	positive	9.58246e-24	0.0175181
	cg27100022	chr11	107800031	RAB39A	positive	9.62816e-24	0.00349068
	cg18979292	chr8	62156604	CLVS1	positive	9.76522e-24	0.0470526
	cg20627988	chr10	133946881	JAKMIP3	positive	9.79458e-24	0.000543214
	cg15843939	chr10	82778922	SH2D4B	positive	9.80886e-24	0.0028337
	cg11607339	chr18	72461323	ZNF407	positive	9.84466e-24	0.0449008
	cg05938197	chr3	54674405	CACNA2D3	positive	9.91943e-24	0.0106495
	cg14490984	chr15	78075626	LINGO1	positive	9.95886e-24	0.000238926
	cg07824269	chr6	24601248	KIAA0319	positive	1.00579e-23	0.00560894
	cg19121352	chr2	133247007	GPR39	positive	1.01033e-23	0.0195318
	cg03866831	chr16	9849427	GRIN2A	positive	1.01597e-23	0.000430407
	cg03046886	chr1	18869151	KLHDC7A	positive	1.02093e-23	0.0215262
	cg05988144	chr6	77268446	IMPG1	positive	1.03166e-23	0.00266478
	cg16929025	chr8	58449616	LINC00588	positive	1.03402e-23	0.000529912
	cg02706365	chr2	18058830	KCNS3	positive	1.03641e-23	0.0265684
	cg19793747	chr12	53232814	KRT78	positive	1.06965e-23	0.0151352
	cg05249382	chr3	160639014	PPM1L	positive	1.0778e-23	0.0119075
	cg10137084	chr3	54156330	CACNA2D3	positive	1.08563e-23	0.0359562
	cg14683017	chr6	10417087	TFAP2A	positive	1.10457e-23	0.0446738
	cg11968571	chr7	156179070	LOC285889	positive	1.10804e-23	4.05091e-05
	cg08200686	chr6	169215492	SMOC2	positive	1.13178e-23	0.000121946
	cg12730323	chr1	200004757	NR5A2	positive	1.15016e-23	0.00419166
	cg13917343	chr20	55450100	TFAP2C	positive	1.17226e-23	0.000903738
	cg00955911	chr14	38061988	FOXA1	positive	1.19974e-23	0.0299019
	cg01117274	chr8	15094114	SGCZ	positive	1.20823e-23	0.00390499
	cg27098663	chr10	109672784	SORCS1	positive	1.21232e-23	0.00152246
	cg13991374	chr16	48136791	ABCC12	positive	1.2167e-23	0.00412472
	cg21220520	chr14	57960464	CCDC198	positive	1.2173e-23	0.00107908
	cg23389194	chr16	47892451	PHKB	positive	1.24532e-23	0.000702962
	cg25932443	chr1	39005813	RRAGC	positive	1.25319e-23	0.00116361
	cg12099524	chr14	60975537	SIX6	positive	1.26274e-23	0.00316051
	cg22027865	chr8	77147679	ZFHX4-AS1	positive	1.26896e-23	0.00557216
	cg13456086	chr8	110704757	SYBU	positive	1.27148e-23	0.00646373
	cg15510895	chr19	34178390	CHST8	positive	1.27237e-23	3.28125e-06
	cg07352438	chr18	5543548	EPB41L3	positive	1.27997e-23	0.00418741
	cg26658272	chr5	1241765	SLC6A18	positive	1.28494e-23	0.00395639
	cg07944740	chr3	181044466	SOX2-OT	positive	1.31088e-23	0.00371396
	cg04832177	chr10	77155143	ZNF503	positive	1.31279e-23	0.00635617
	cg10875753	chr4	3733842	ADRA2C	positive	1.32409e-23	0.000215114
	cg08971484	chr12	115354458	TBX3	positive	1.3382e-23	0.00266567
	cg07403525	chr19	16848975	NWD1	positive	1.34613e-23	0.0112322
	cg16598016	chr4	176708523	GPM6A	positive	1.34828e-23	0.030272
	cg05163329	chr12	16762789	LMO3	positive	1.35233e-23	0.0235639
	cg14975429	chr2	182549604	CERKL	positive	1.36443e-23	0.000943669
	cg10854767	chr7	157495969	PTPRN2	positive	1.36572e-23	0.00687672
	cg14239655	chr12	46005115	LINC00938	positive	1.37684e-23	0.00216268
	cg02909158	chr13	100616256	ZIC5	positive	1.3787e-23	0.000772283
	cg02234281	chr10	25790938	GPR158	positive	1.39193e-23	0.0304237
	cg19921677	chr20	42523187	TOX2	positive	1.39611e-23	6.25488e-05
	cg24243753	chr6	97972900	MMS22L	positive	1.41095e-23	0.00376035
	cg20497668	chr10	134624132	CFAP46	positive	1.42271e-23	0.0221276
	cg24258699	chr8	72756901	MSC-AS1	positive	1.42448e-23	0.0133282
	cg16029361	chr1	22924227	EPHA8	positive	1.42812e-23	0.0106052
	cg04272694	chr6	168718991	DACT2	positive	1.42862e-23	0.00301319
	cg04351698	chr1	34462469	CSMD2	positive	1.44405e-23	0.00559123
	cg22287711	chr5	139282860	NRG2	positive	1.45075e-23	0.0116897
	cg12626971	chr20	37939266	LINC01734	positive	1.45705e-23	0.00552552
	cg22116328	chr2	240868565	MIR4786	positive	1.45714e-23	0.000708017
	cg26822551	chr1	179544476	NPHS2	positive	1.45857e-23	0.00414354
	cg00908927	chr11	79152969	TENM4	positive	1.45987e-23	0.000516572
	cg24643286	chr9	126769990	LHX2	positive	1.46178e-23	6.90638e-05
	cg00389547	chr11	101897185	CFAP300	positive	1.47433e-23	0.029268
	cg09347160	chr4	83513063	LINC00575	positive	1.5158e-23	0.000227171
	cg27648405	chr17	6922960	MIR497HG	positive	1.55219e-23	0.0212279
	cg05333844	chr19	46184403	GIPR	positive	1.55776e-23	0.0423573
	cg19749224	chr1	43296467	ERMAP	positive	1.58306e-23	0.0111911
	cg17982116	chr5	72747699	BTF3	positive	1.58375e-23	0.0204516
	cg18583021	chr19	13685826	CACNA1A	positive	1.58766e-23	0.012551
	cg01920829	chr2	219824761	CDK5R2	positive	1.61267e-23	0.0107335
	cg23619365	chr13	112712009	SOX1	positive	1.61978e-23	0.00577903
	cg14709460	chr7	28998078	TRIL	positive	1.63288e-23	0.000194864
	cg11984463	chr19	40725596	TTC9B	positive	1.64044e-23	0.0287648
	cg15422685	chr3	62356774	FEZF2	positive	1.65466e-23	0.000523706
	cg11619390	chr1	32931179	ZBTB8A	positive	1.65681e-23	0.00854927
	cg07369559	chr16	71559445	CHST4	positive	1.65866e-23	0.000125133
	cg06392440	chr22	26907675	TFIP11	positive	1.67544e-23	0.0120536
	cg00203124	chr5	153860358	HAND1	positive	1.67658e-23	0.000350173
	cg11416384	chr4	37246827	NWD2	positive	1.67738e-23	0.000501675
	cg18630503	chr8	93031570	RUNX1T1	positive	1.6898e-23	0.012255
	cg10885555	chr9	136243715	STKLD1	positive	1.70959e-23	0.000811982
	cg00959431	chr9	79638117	FOXB2	positive	1.72098e-23	0.0154418
	cg06567635	chr5	72526726	TMEM174	positive	1.72495e-23	0.00913804
	cg14943534	chr9	138626780	KCNT1	positive	1.72648e-23	0.00652172
	cg00145875	chr2	11104394	KCNF1	positive	1.72928e-23	0.0342253
	cg11106260	chr9	112214180	PTPN3	positive	1.75002e-23	0.0494311
	cg15966954	chr5	135231547	IL9	positive	1.76724e-23	0.000509878
	cg16706349	chr10	85836590	GHITM	positive	1.77542e-23	0.0302755
	cg25485055	chr5	5271554	ADAMTS16	positive	1.78977e-23	0.00119001
	cg25238876	chr6	146348596	GRM1	positive	1.80367e-23	0.0222284
	cg10407418	chr2	207095608	CMKLR2	positive	1.80747e-23	0.0399459
	cg07017093	chr1	118471375	GDAP2	positive	1.81788e-23	0.0256176
	cg01854882	chr9	113800520	LPAR1	positive	1.81795e-23	0.00272454
	cg02303933	chr4	187475669	MTNR1A	positive	1.82458e-23	0.00136603
	cg15331007	chr1	18418686	IGSF21	positive	1.8375e-23	0.00643985
	cg26954114	chr15	96838120	NR2F2-AS1	positive	1.83914e-23	0.0014951
	cg16375541	chr3	45078017	CLEC3B	positive	1.84576e-23	0.0127026
	cg11935638	chr3	184972145	EHHADH	positive	1.84636e-23	0.00271239
	cg23066159	chr19	51481472	KLK7	positive	1.86196e-23	0.00192713
	cg02184644	chr7	150677125	KCNH2	positive	1.87138e-23	0.0296579
	cg08838671	chr22	42311374	SHISA8	positive	1.87171e-23	0.0447433
	cg08314300	chr2	162278173	TBR1	positive	1.87687e-23	0.0088255
	cg16945040	chr14	36790945	MBIP	positive	1.88128e-23	0.00209371
	cg17876197	chr17	70464786	LINC00673	positive	1.90941e-23	0.000292535
	cg09090582	chr7	155324691	CNPY1	positive	1.91108e-23	0.000899861
	cg11265488	chr8	35913614	UNC5D	positive	1.93456e-23	0.000979546
	cg26307248	chr16	75895949	TERF2IP	positive	1.95412e-23	0.000391604
	cg01396303	chr11	26495152	ANO3	positive	1.95857e-23	0.0012829
	cg11821637	chr12	79876086	SYT1	positive	1.98253e-23	0.00804722
	cg05200715	chr12	75603748	KCNC2	positive	1.99214e-23	0.000856222
	cg10486055	chr19	55581038	RDH13	positive	2.00485e-23	0.0026617
	cg11229872	chr2	175195899	LINC01305	positive	2.00571e-23	0.0360082
	cg12845975	chr3	62305226	C3orf14	positive	2.0077e-23	0.024055
	cg03785619	chr12	54373040	HOXC11	positive	2.02138e-23	0.00787914
	cg03654598	chr19	51202141	SHANK1	positive	2.02765e-23	2.34363e-07
	cg23301925	chr14	91294322	TTC7B	positive	2.03795e-23	1.31652e-05
	cg23520422	chr12	76423956	PHLDA1	positive	2.05089e-23	0.000308236
	cg17541528	chr13	110959650	COL4A2	positive	2.06722e-23	0.0292345
	cg25766748	chr19	13614882	CACNA1A	positive	2.0934e-23	0.000180468
	cg15549011	chr11	69565730	FGF4	positive	2.14313e-23	0.00732344
	cg00113096	chr2	134119805	NCKAP5	positive	2.14319e-23	0.00397575
	cg06096850	chr18	56886218	GRP	positive	2.20442e-23	0.000598906
	cg23580725	chr14	99707721	BCL11B	positive	2.22243e-23	0.0211175
	cg09321582	chr20	5891218	CHGB	positive	2.23015e-23	0.000597609
	cg06092729	chr12	64845451	TBK1	negative	2.24665e-23	0.0474738
	cg23196346	chr10	24808256	KIAA1217	positive	2.25421e-23	0.00196555
	cg22849865	chr16	8688380	METTL22	positive	2.26341e-23	0.00876429
	cg20079992	chr19	51192728	SHANK1	positive	2.26404e-23	1.8003e-06
	cg02218496	chr2	172948176	DLX1	positive	2.30897e-23	0.0208453
	cg11651285	chr20	21494762	NKX2-2	positive	2.35578e-23	0.0126974
	cg13234653	chr14	99724598	BCL11B	positive	2.37516e-23	0.0421678
	cg16897103	chr15	96894342	NR2F2	positive	2.37692e-23	0.00972032
	cg12989015	chr1	114575758	OLFML3	positive	2.40052e-23	0.0127667
	cg24150172	chr8	55372111	SOX17	positive	2.4097e-23	0.000292993
	cg26608430	chr2	103858077	TMEM182	positive	2.42848e-23	0.0101283
	cg14957671	chr12	128092394	LINC02393	positive	2.43586e-23	0.00261942
	cg19193725	chr5	92023972	NR2F1-AS1	positive	2.45516e-23	0.0343367
	cg13434411	chr9	970297	DMRT1	positive	2.48251e-23	0.00321269
	cg01916276	chr9	100618115	FOXE1	positive	2.4854e-23	0.000877043
	cg04881720	chr20	62680247	SOX18	positive	2.50561e-23	1.77778e-05
	cg27567836	chr10	124091022	BTBD16	positive	2.50768e-23	0.00754228
	cg17183991	chr13	96743170	HS6ST3	positive	2.52869e-23	0.00675689
	cg01231735	chr4	13548635	LINC01096	positive	2.5395e-23	0.00649717
	cg17146526	chr2	175192666	LINC01305	positive	2.54395e-23	0.00346462
	cg20155367	chr5	121465084	ZNF474	positive	2.55336e-23	0.00259968
	cg11981240	chr14	68038357	PLEKHH1	positive	2.55938e-23	0.0041769
	cg05262746	chr3	110792096	NECTIN3	positive	2.56914e-23	0.0174539
	cg25422422	chr8	32600392	NRG1	positive	2.58586e-23	0.00494799
	cg22779217	chr8	3845233	CSMD1	positive	2.61079e-23	0.000350274
	cg25100883	chr11	114717311	NXPE2	positive	2.61561e-23	0.0150165
	cg04966191	chr8	133495394	KCNQ3	positive	2.62262e-23	0.00608372
	cg10767045	chr10	89264128	MINPP1	positive	2.6733e-23	0.0159327
	cg26507427	chr6	100054548	PRDM13	positive	2.67823e-23	0.00254419
	cg13337731	chr7	73011308	MLXIPL	positive	2.69315e-23	7.70474e-07
	cg23452259	chr2	219823559	CDK5R2	positive	2.69332e-23	0.00184061
	cg26139133	chr3	24536765	THRB-AS1	positive	2.69876e-23	3.79443e-05
	cg21849844	chr13	100611865	ZIC5	positive	2.78859e-23	0.000968227
	cg22229142	chr22	37447306	KCTD17	positive	2.80861e-23	4.67712e-08
	cg02055817	chr6	1398365	FOXF2	positive	2.85027e-23	0.00190877
	cg06549231	chr3	76696587	ROBO2	positive	2.8588e-23	0.00960171
	cg17709391	chr13	101480751	NALCN-AS1	positive	2.88119e-23	0.0206506
	cg15284635	chr3	10858504	SLC6A11	positive	2.88288e-23	0.0141751
	cg08299265	chr12	54354414	HOTAIR	positive	2.90477e-23	0.000497921
	cg01573089	chr10	696063	DIP2C	positive	2.90519e-23	1.37818e-05
	cg00860808	chr2	171670500	GAD1	positive	2.91116e-23	0.000176586
	cg16411479	chr6	169786706	WDR27	positive	2.94048e-23	0.0343556
	cg00398764	chr15	37402637	MEIS2	positive	2.95471e-23	0.0172909
	cg08552812	chr2	73612302	ALMS1	positive	2.96713e-23	0.000461026
	cg12536379	chr20	62782967	MYT1	positive	2.9711e-23	0.000446811
	cg08793511	chr2	227698065	RHBDD1	negative	2.98747e-23	0.00222975
	cg25185173	chr4	154712580	SFRP2	positive	3.00479e-23	1.07683e-05
	cg10961330	chr11	31849190	PAX6-AS1	positive	3.00857e-23	0.0276781
	cg00485232	chr12	119312660	SRRM4	positive	3.02631e-23	0.0209129
	cg07254667	chr10	87291812	GRID1-AS1	positive	3.0593e-23	0.0114836
	cg03494529	chr15	66301522	MEGF11	positive	3.10059e-23	0.00109005
	cg05486988	chr9	112191366	PTPN3	positive	3.11983e-23	0.000919523
	cg24000528	chr2	177013630	MIR10B	positive	3.12972e-23	0.00757196
	cg20234542	chr5	15500256	FBXL7	positive	3.1572e-23	0.00426826
	cg14036128	chr11	134296018	B3GAT1-DT	positive	3.18024e-23	0.00462352
	cg26575955	chr4	34185694	ARAP2	positive	3.1905e-23	0.0277477
	cg15225780	chr10	50813652	NA	positive	3.23686e-23	0.00210517
	cg11568420	chr10	103004314	LBX1-AS1	positive	3.24068e-23	0.0482522
	cg26796793	chr15	90451632	ARPIN-AP3S2	negative	3.27867e-23	5.17269e-05
	cg23313699	chr20	55604860	BMP7	positive	3.28076e-23	0.00690944
	cg17726207	chr5	155079108	SGCD	positive	3.2882e-23	0.0345168
	cg20204167	chr14	75390282	RPS6KL1	positive	3.31128e-23	0.0379292
	cg18991549	chr5	140346309	PCDHAC2	positive	3.33489e-23	5.73045e-05
	cg24291440	chr8	87318204	WWP1	positive	3.41898e-23	0.00161396
	cg17307791	chr4	26806179	TBC1D19	positive	3.42564e-23	0.044988
	cg22375689	chr19	34175036	CHST8	positive	3.45803e-23	0.0340083
	cg10883626	chr8	105235446	RIMS2	positive	3.48127e-23	0.0126465
	cg21984150	chr5	121648022	SNCAIP	positive	3.49967e-23	7.49881e-05
	cg15415452	chr13	112759355	SOX1	positive	3.62916e-23	0.00130422
	cg00592980	chr4	85154069	NKX6-1	positive	3.63482e-23	0.0374257
	cg23684546	chr17	77411311	RBFOX3	positive	3.64197e-23	0.0460165
	cg12146386	chr3	14643925	CCDC174	positive	3.64592e-23	0.0384068
	cg25399352	chr12	114837572	TBX5	positive	3.6652e-23	0.00456986
	cg25456249	chr7	1403856	MICALL2	positive	3.67775e-23	0.002865
	cg00474090	chr12	119419116	SRRM4	positive	3.68572e-23	0.0239581
	cg07811933	chr7	1361132	UNCX	positive	3.69782e-23	0.0118749
	cg17393267	chr3	192127356	FGF12	positive	3.71684e-23	0.0329435
	cg25234740	chr13	112729279	SOX1	positive	3.71916e-23	0.0154844
	cg05021643	chr2	177029608	HOXD3	positive	3.73433e-23	0.00324546
	cg27010104	chr1	29658819	PTPRU	positive	3.77515e-23	0.0110067
	cg12490395	chr12	16760894	LMO3	positive	3.81262e-23	0.000558359
	cg01841825	chr18	50430247	DCC	positive	3.83853e-23	0.00584205
	cg15752343	chr10	124904190	HMX2	positive	3.90836e-23	0.000176963
	cg06139918	chr3	164569155	SI	positive	3.92106e-23	0.000809056
	cg08527127	chr1	34643941	C1orf94	positive	3.92782e-23	3.94423e-05
	cg24770924	chr1	33350408	HPCA	positive	3.959e-23	0.00156907
	cg14845129	chr1	14866730	KAZN	positive	4.01269e-23	0.000124236
	cg13048358	chr3	14539069	GRIP2	positive	4.03256e-23	0.000144086
	cg08736225	chr2	18654908	NT5C1B-RDH14	positive	4.03887e-23	0.0155452
	cg20769477	chr2	133897532	NCKAP5	positive	4.08083e-23	0.00146884
	cg18864674	chr1	21058007	SH2D5	positive	4.15845e-23	0.0165868
	cg22157069	chr1	226756482	STUM	positive	4.1963e-23	0.000911395
	cg13316625	chr12	117801001	NOS1	positive	4.21307e-23	9.09072e-05
	cg25745642	chr1	155050609	EFNA3	positive	4.23577e-23	0.0435227
	cg06852350	chr15	75119324	CPLX3	positive	4.3219e-23	0.000329602
	cg12208258	chr18	25757438	CDH2	positive	4.32506e-23	0.00135204
	cg23274474	chr14	82475680	SEL1L	positive	4.33384e-23	0.00391811
	cg13713677	chr12	108523054	WSCD2	positive	4.33611e-23	0.000619461
	cg21332500	chr7	27233480	HOXA13	positive	4.35675e-23	0.00297228
	cg13468667	chr18	3411996	TGIF1	positive	4.39809e-23	0.0479981
	cg19665640	chr22	33560025	SYN3	positive	4.41098e-23	0.0255992
	cg05481811	chr14	33408260	NPAS3	positive	4.44083e-23	0.0266029
	cg06663665	chr8	15096061	SGCZ	positive	4.46663e-23	0.00290158
	cg07154254	chr1	201979128	ELF3	positive	4.47921e-23	0.00032858
	cg08491291	chr1	18465087	IGSF21	positive	4.50801e-23	0.0151221
	cg07348641	chr13	25746495	AMER2	positive	4.51409e-23	0.00801308
	cg02177289	chr2	110371614	SEPTIN10	positive	4.52547e-23	0.00495331
	cg21463380	chr3	187389127	SST	positive	4.58966e-23	0.0441428
	cg17544757	chr19	10131398	RDH8	positive	4.6164e-23	1.04883e-05
	cg14165051	chr2	230135879	PID1	positive	4.63212e-23	0.000573239
	cg15927720	chr5	168728149	SLIT3	positive	4.63639e-23	0.0449727
	cg15219657	chr3	69355790	FRMD4B	negative	4.71918e-23	0.0249098
	cg10583144	chr13	51795680	FAM124A	positive	4.72064e-23	0.0205102
	cg00796424	chr12	54365966	HOTAIR	positive	4.72304e-23	0.00719274
	cg03002352	chr2	17699688	RAD51AP2	positive	4.79611e-23	0.00718068
	cg01393581	chr8	20112855	LZTS1	positive	4.82767e-23	2.11409e-05
	cg11685396	chr1	180511955	ACBD6	positive	4.83304e-23	0.0306499
	cg23231587	chr2	42783740	MTA3	positive	5.06132e-23	0.040844
	cg18916060	chr14	57266029	OTX2	positive	5.15301e-23	0.0135472
	cg17172532	chr15	79383164	RASGRF1	positive	5.15952e-23	0.0230882
	cg12130328	chr1	82269019	ADGRL2	positive	5.20245e-23	0.000131652
	cg06795316	chr13	20161158	TPTE2	positive	5.27327e-23	0.00184833
	cg24459147	chr21	38068581	SIM2	positive	5.27709e-23	0.00057624
	cg10295298	chr8	28861701	HMBOX1	positive	5.2875e-23	0.0407272
	cg11666087	chr1	49242513	BEND5	positive	5.31752e-23	0.0069218
	cg05059891	chr1	31289407	SDC3	positive	5.31839e-23	0.0362307
	cg01138171	chr2	131724244	ARHGEF4	positive	5.32397e-23	0.000867048
	cg08129767	chr16	26605189	HS3ST4	positive	5.33698e-23	0.00105665
	cg03223881	chr10	133857863	JAKMIP3	positive	5.34543e-23	0.00771082
	cg00817628	chr9	109578836	ZNF462	positive	5.37173e-23	0.00393887
	cg04079758	chr19	51509867	KLK9	positive	5.41567e-23	0.000481863
	cg25047092	chr2	61991905	FAM161A	positive	5.43358e-23	0.0364003
	cg05574357	chr12	115134362	TBX3	positive	5.48083e-23	0.000586832
	cg09174829	chr1	42631405	GUCA2A	positive	5.49859e-23	0.00422519
	cg05573844	chr12	54354590	HOTAIR	positive	5.51588e-23	0.0073073
	cg08828733	chr12	45268613	NELL2	positive	5.52868e-23	1.75991e-05
	cg04845869	chr18	11750587	GNAL	positive	5.58951e-23	0.00615836
	cg08661338	chr15	25321221	SNORD109B	positive	5.59724e-23	0.00263974
	cg01940576	chr14	36946996	SFTA3	positive	5.63519e-23	0.000304724
	cg01091029	chr7	31232532	ADCYAP1R1	positive	5.64373e-23	0.0027588
	cg22792735	chr17	63558426	AXIN2	positive	5.66295e-23	0.00519928
	cg15301794	chr11	31822243	PAX6	positive	5.71632e-23	0.0232782
	cg15217349	chr16	69344379	VPS4A	positive	5.72033e-23	0.0139722
	cg08584798	chr8	84463156	RALYL	positive	5.72647e-23	7.87044e-05
	cg24068815	chr14	96661225	BDKRB2	positive	5.75644e-23	0.00276731
	cg08524522	chr9	138002821	OLFM1	positive	5.78776e-23	0.00350547
	cg09835225	chr10	18429643	CACNB2	positive	5.80473e-23	0.00888962
	cg00523068	chr5	134905977	CXCL14	positive	5.84631e-23	0.000152414
	cg25449484	chr5	92929372	NR2F1	positive	5.85324e-23	0.000118568
	cg17885404	chr8	67976175	CSPP1	positive	5.87067e-23	0.00883169
	cg21155767	chr14	95374525	GSC	positive	5.92845e-23	0.0295156
	cg00883565	chr10	133851416	BNIP3	positive	5.94636e-23	0.000124815
	cg04453065	chr1	86046661	CCN1	positive	5.98821e-23	8.33995e-05
	cg24031355	chr10	22634439	SPAG6	positive	6.06162e-23	0.018925
	cg01314359	chr15	25382277	PWAR1	positive	6.09015e-23	0.0200584
	cg02456074	chr1	19059295	PAX7	positive	6.11228e-23	0.000546927
	cg17863743	chr10	100993587	HPSE2	positive	6.1174e-23	0.0107702
	cg18427106	chr5	5014678	LINC01020	positive	6.1561e-23	0.00106064
	cg01162672	chr6	133562275	EYA4	positive	6.1563e-23	0.00860134
	cg01297370	chr2	228027989	COL4A4	positive	6.21421e-23	5.97172e-05
	cg10928038	chr11	125138186	PKNOX2	positive	6.23229e-23	0.0116942
	cg10918202	chr8	104153173	BAALC-AS2	positive	6.25986e-23	0.0121948
	cg03602297	chr2	30142128	ALK	positive	6.26013e-23	0.00662495
	cg18815943	chr1	47882314	FOXE3	positive	6.26437e-23	0.00300329
	cg21775931	chr20	59711066	CDH4	positive	6.27035e-23	2.03565e-06
	cg06324137	chr9	113214678	SVEP1	positive	6.29232e-23	0.0122705
	cg23506042	chr5	50262673	PARP8	positive	6.34292e-23	0.00116222
	cg25741215	chr2	63287082	OTX1	positive	6.34607e-23	0.0272423
	cg22658758	chr5	92935309	NR2F1	positive	6.5e-23	0.00102038
	cg11879591	chr1	230020671	GALNT2	positive	6.55882e-23	0.0019709
	cg07186199	chr14	95243243	GSC	positive	6.59602e-23	0.00478162
	cg10632728	chr1	18875315	KLHDC7A	positive	6.64369e-23	0.00132824
	cg20796611	chr1	18152639	ACTL8	positive	6.71039e-23	0.011947
	cg04982896	chr19	10122768	RDH8	positive	6.75658e-23	0.0126631
	cg06892009	chr11	79151611	TENM4	positive	6.76145e-23	0.0043903
	cg10945079	chr2	162283856	TBR1	positive	6.76471e-23	5.56593e-05
	cg09428510	chr19	57153719	SMIM17	positive	6.8065e-23	0.0341766
	cg14983606	chr8	65493706	BHLHE22	positive	6.83125e-23	0.000708378
	cg05664581	chr3	181428242	SOX2-OT	positive	6.83963e-23	0.0176379
	cg01715450	chr1	14609119	KAZN	positive	6.85294e-23	0.00480019
	cg23262094	chr1	209422036	MIR205HG	positive	6.86367e-23	0.000562002
	cg15329876	chr17	39728628	JUP	positive	6.88646e-23	0.000113771
	cg21303468	chr14	79256726	NRXN3	positive	6.91126e-23	9.36661e-05
	cg11139482	chr19	19384364	HAPLN4	positive	6.98161e-23	0.00350731
	cg05109877	chr20	62009433	CHRNA4	positive	7.03794e-23	0.0136151
	cg04455646	chr3	10206344	IRAK2	positive	7.11737e-23	0.025198
	cg25786525	chr10	77991332	LRMDA	positive	7.1444e-23	0.0110365
	cg19805223	chr22	25346191	TMEM211	positive	7.14864e-23	0.00378928
	cg22189019	chr19	640346	FGF22	positive	7.15132e-23	3.86043e-06
	cg06159486	chr10	18429691	CACNB2	positive	7.15491e-23	0.000253412
	cg20636399	chr14	92829261	SLC24A4	positive	7.22756e-23	0.042384
	cg03531013	chr4	174817147	HAND2-AS1	positive	7.28064e-23	0.0166581
	cg00885512	chr3	64519197	ADAMTS9	positive	7.29819e-23	0.027937
	cg12442809	chr4	5895960	CRMP1	positive	7.31711e-23	0.00265319
	cg18646207	chr10	118897836	VAX1	positive	7.40199e-23	0.00155027
	cg25200182	chr1	158119395	LINC01704	positive	7.41815e-23	2.46203e-06
	cg17061373	chr16	48089292	ABCC12	positive	7.47058e-23	0.0305597
	cg18630040	chr6	46702983	PLA2G7	positive	7.53481e-23	0.0304037
	cg26963271	chr1	66259081	PDE4B	positive	7.5386e-23	0.00300524
	cg12419052	chr3	147126121	ZIC1	positive	7.56756e-23	0.000431028
	cg14794991	chr10	87971936	GRID1	positive	7.58487e-23	0.00393339
	cg12181189	chr10	133857474	JAKMIP3	positive	7.63168e-23	0.00237163
	cg20682326	chr7	100844173	MOGAT3	positive	7.74413e-23	0.00029891
	cg19854171	chr16	68478620	SMPD3	positive	7.74875e-23	0.018214
	cg14689119	chr16	52016547	LINC02911	positive	7.75498e-23	0.00487799
	cg07832488	chr21	18147518	MIR99AHG	positive	7.76135e-23	0.000948233
	cg16204205	chr18	19753432	GATA6	positive	7.7687e-23	2.10861e-05
	cg03880756	chr11	78543385	TENM4	positive	7.79858e-23	0.000625289
	cg23476076	chr5	174870471	DRD1	positive	7.8608e-23	0.00172401
	cg04120329	chr10	135160120	PRAP1	positive	7.86759e-23	0.00633199
	cg00456326	chr2	19560467	OSR1	positive	7.88416e-23	0.000779058
	cg23640964	chr16	1115091	SSTR5-AS1	positive	7.92541e-23	0.000505901
	cg07570610	chr10	125425034	GPR26	positive	7.93215e-23	3.7752e-05
	cg20522387	chr3	61548172	PTPRG	positive	7.93718e-23	0.000508502
	cg02595832	chr10	129535786	FOXI2	positive	7.94022e-23	0.00329384
	cg08028026	chr19	39686583	NCCRP1	positive	7.9477e-23	0.0351476
	cg04114181	chr12	54179226	CALCOCO1	positive	8.05913e-23	0.00606717
	cg11244340	chr13	96743583	HS6ST3	positive	8.13662e-23	0.0305401
	cg20581674	chr3	24887420	NA	positive	8.21635e-23	6.26764e-05
	cg25936510	chr11	22353524	SLC17A6	positive	8.25639e-23	0.0415457
	cg16908257	chr12	54404893	HOXC8	positive	8.31926e-23	0.013771
	cg00968875	chr13	113798280	F10	positive	8.32769e-23	0.00471334
	cg02500195	chr15	100694725	ADAMTS17	positive	8.34831e-23	0.00150149
	cg26914865	chr19	13735016	YJU2B	positive	8.41297e-23	0.00333189
	cg00541104	chr7	158359935	PTPRN2	positive	8.46925e-23	0.00101199
	cg14818694	chr1	156542677	IQGAP3	positive	8.56869e-23	5.43461e-07
	cg11930390	chr12	110561809	IFT81	positive	8.63775e-23	0.0435422
	cg17961359	chr16	34874225	RNA5SP411	positive	8.64086e-23	0.000578637
	cg11959896	chr4	649276	PDE6B	positive	8.68844e-23	0.00175241
	cg01501775	chr12	54095918	CALCOCO1	positive	8.77898e-23	0.00248186
	cg01921432	chr1	91182534	BARHL2	positive	8.80334e-23	0.00412087
	cg24431930	chr15	78078350	LINGO1	positive	8.86208e-23	9.26875e-05
	cg02361878	chr1	165326327	LMX1A	positive	8.9717e-23	0.0419847
	cg21825075	chr21	40034422	ERG	positive	9.00589e-23	0.000471099
	cg03563169	chr6	85445250	TBX18	positive	9.02765e-23	0.0095355
	cg08183125	chr14	80678293	DIO2-AS1	positive	9.03324e-23	0.0437533
	cg13942791	chr19	47744000	BBC3	positive	9.26597e-23	0.0251726
	cg15108699	chr20	62509164	TPD52L2	positive	9.29328e-23	0.0368027
	cg04672706	chr8	55370423	SOX17	positive	9.30669e-23	1.48151e-06
	cg08748105	chr16	3266276	OR1F2P	positive	9.32467e-23	0.0316086
	cg06962549	chr11	44308190	ALX4	positive	9.35871e-23	0.000203664
	cg07848409	chr3	172166987	GHSR	positive	9.43511e-23	0.00031592
	cg23428143	chr14	57385648	OTX2-AS1	positive	9.46448e-23	0.0438787
	cg16701007	chr19	17982599	SLC5A5	positive	9.46685e-23	0.00780266
	cg25976221	chr8	73448390	KCNB2	positive	9.55429e-23	0.00135237
	cg00627447	chr16	83233690	CDH13	positive	9.61953e-23	0.000996616
	cg09462240	chr4	1409497	NA	positive	9.65146e-23	0.00822543
	cg18854419	chr11	91957989	FAT3	positive	9.80317e-23	0.00892535
	cg10766966	chr7	128337381	FAM71F1	positive	9.82036e-23	0.00248959
	cg12638261	chr12	22063773	ABCC9	positive	9.91582e-23	0.0121607
	cg25617328	chr5	76939333	OTP	positive	9.98862e-23	0.00021227
	cg00222175	chr22	34049875	LARGE1	positive	1.00489e-22	0.000382963
	cg15521914	chr2	128664045	AMMECR1L	positive	1.01352e-22	0.015555
	cg25836326	chr3	113898609	DRD3	positive	1.01429e-22	0.00384864
	cg20354054	chr19	12941401	RTBDN	positive	1.01667e-22	0.0388062
	cg01784825	chr11	61377918	RPLP0P2	positive	1.01728e-22	4.02333e-05
	cg25797055	chr4	141490097	UCP1	positive	1.0204e-22	0.00443046
	cg14212206	chr12	54350153	HOXC12	positive	1.02122e-22	0.00135219
	cg24704123	chr18	10454989	APCDD1	positive	1.02178e-22	0.000288477
	cg26464945	chr16	26082472	HS3ST4	positive	1.02788e-22	0.00122373
	cg12989372	chr16	20362652	UMOD	positive	1.03141e-22	0.0311804
	cg14753432	chr11	44324833	ALX4	positive	1.03191e-22	0.0217095
	cg13621679	chr17	37761692	NEUROD2	positive	1.06233e-22	0.00473545
	cg12371557	chr6	130469618	SAMD3	positive	1.06955e-22	0.0252557
	cg22189386	chr3	63263752	SYNPR	positive	1.07307e-22	0.034926
	cg26191549	chr19	56288994	RFPL4AL1	positive	1.07873e-22	0.00072253
	cg21366993	chr18	76744819	SALL3	positive	1.07974e-22	0.00578247
	cg01580681	chr4	174450016	HAND2	positive	1.09215e-22	0.0194776
	cg17548347	chr20	44144225	SPINT3	positive	1.09241e-22	0.00604103
	cg13471560	chr16	54960485	CRNDE	positive	1.09335e-22	0.0332034
	cg17255928	chr1	38988723	LINC01343	positive	1.10923e-22	6.17182e-05
	cg03021505	chr10	65479109	REEP3	positive	1.11446e-22	0.000947542
	cg14579734	chr8	142065135	PTK2	positive	1.12364e-22	0.00918058
	cg02926820	chr17	78475691	NPTX1	positive	1.1304e-22	0.00708267
	cg04629700	chr1	156414170	MIR9-1HG	positive	1.13584e-22	0.029476
	cg13174253	chr8	146278678	C8orf33	positive	1.13845e-22	0.00013238
	cg04105966	chr18	908745	ADCYAP1	positive	1.15212e-22	0.0302217
	cg00643896	chr15	57884038	MYZAP	positive	1.16195e-22	0.000480387
	cg07268048	chr3	55162552	CACNA2D3	positive	1.16809e-22	0.00616716
	cg25353308	chr1	120191124	ZNF697	positive	1.18072e-22	0.021309
	cg25755191	chr1	167013332	GPA33	positive	1.21893e-22	0.00626219
	cg22805756	chr12	108323493	LOC728739	positive	1.21905e-22	0.000552671
	cg19066391	chr3	49203973	CCDC71	positive	1.23228e-22	0.0261515
	cg17443252	chr9	122257581	BRINP1	positive	1.23799e-22	0.0387069
	cg17737621	chr20	21372480	XRN2	positive	1.24706e-22	0.00767489
	cg15827318	chr5	140252671	PCDHA11	positive	1.25382e-22	0.001915
	cg11885098	chr19	1285397	EFNA2	positive	1.26342e-22	0.00827773
	cg13816428	chr14	21625173	OR5AU1	positive	1.26458e-22	0.0185559
	cg03074654	chr2	72058564	DYSF	positive	1.26638e-22	0.0199814
	cg10386483	chr15	35047189	GJD2	positive	1.27325e-22	0.0191745
	cg18336674	chr5	170735264	TLX3	positive	1.27921e-22	0.00439405
	cg08484791	chr14	94266254	PRIMA1	positive	1.28189e-22	0.000298263
	cg14679255	chr12	54385526	MIR196A2	positive	1.29778e-22	0.000411959
	cg11136654	chr2	235286867	ARL4C	positive	1.29899e-22	0.000447447
	cg08585206	chr7	32420897	LOC100130673	positive	1.30432e-22	0.00132375
	cg24884332	chr16	48997458	CBLN1	positive	1.31999e-22	0.0100007
	cg11314607	chr15	59729057	FAM81A	positive	1.32125e-22	0.00527125
	cg10323353	chr20	55357000	TFAP2C	positive	1.32302e-22	0.0264187
	cg22654055	chr4	8046793	ABLIM2	positive	1.32523e-22	0.0168645
	cg11358689	chr11	131781260	NTM	positive	1.32942e-22	0.00792828
	cg04643655	chr15	48413344	SLC24A5	positive	1.33403e-22	0.00102078
	cg10079740	chr16	55513480	MMP2	positive	1.3421e-22	0.0030909
	cg13183732	chr12	130091846	TMEM132D	positive	1.34451e-22	0.000210451
	cg02189685	chr5	7474081	ADCY2	positive	1.35779e-22	0.0025403
	cg02620875	chr5	127873722	FBN2	positive	1.36485e-22	2.82961e-05
	cg26804446	chr12	101050102	GAS2L3	positive	1.38617e-22	0.013838
	cg01284858	chr10	123902371	TACC2	positive	1.41023e-22	0.000865086
	cg16350608	chr1	97063920	PTBP2	positive	1.4176e-22	0.01082
	cg01984743	chr5	172751331	STC2	positive	1.41801e-22	0.00853759
	cg15445958	chr6	110266125	GPR6	positive	1.42697e-22	0.000958226
	cg21066515	chr13	100636875	ZIC2	positive	1.4349e-22	0.00783971
	cg06508062	chr21	38063872	SIM2	positive	1.43893e-22	0.000160923
	cg25593309	chr7	155754630	SHH	positive	1.43926e-22	0.00456297
	cg14735734	chr18	43678811	ATP5F1A	positive	1.44126e-22	0.00175261
	cg00630637	chr16	20085353	GPR139	positive	1.44287e-22	0.00220264
	cg15311873	chr5	166098992	TENM2	positive	1.44508e-22	0.00630056
	cg13411862	chr7	34885606	NPSR1	positive	1.4484e-22	0.0101818
	cg14393817	chr9	138590270	SOHLH1	positive	1.44861e-22	0.000656437
	cg16479430	chr1	20713422	LINC01141	positive	1.45437e-22	0.0233569
	cg26338619	chr14	95353300	GSC	positive	1.45505e-22	5.42058e-06
	cg02349146	chr7	98161246	NPTX2	positive	1.47058e-22	0.00454883
	cg05537636	chr22	40370068	GRAP2	positive	1.48485e-22	0.000278104
	cg26475005	chr10	24649480	KIAA1217	positive	1.48705e-22	0.00385201
	cg27294268	chr14	36983518	SFTA3	positive	1.51168e-22	0.0119745
	cg05211646	chr20	47060670	LINC00494	positive	1.51845e-22	0.00360803
	cg06439035	chr19	5364763	PTPRS	positive	1.52266e-22	0.00295495
	cg03257379	chr3	10803452	LINC00606	positive	1.52855e-22	0.0131167
	cg02004641	chr5	140306181	PCDHA13	positive	1.53467e-22	0.000503988
	cg08593261	chr4	85419494	NKX6-1	positive	1.53762e-22	0.0173737
	cg00043095	chr2	223289277	SGPP2	positive	1.54653e-22	0.0278109
	cg21226874	chr13	113008051	SPACA7	positive	1.55662e-22	0.000307965
	cg05140624	chr6	129251445	LAMA2	positive	1.55788e-22	0.000995563
	cg03436911	chr20	44942251	CDH22	positive	1.57024e-22	0.00741234
	cg08828193	chr10	179725	ZMYND11	positive	1.57986e-22	0.000128056
	cg27386241	chr8	70242091	SULF1	positive	1.58435e-22	4.28699e-05
	cg13169968	chr1	230563798	PGBD5	positive	1.62309e-22	0.000417616
	cg14021871	chr19	19384381	HAPLN4	positive	1.65209e-22	2.78508e-06
	cg15894129	chr11	69521774	FGF19	positive	1.67845e-22	0.00726763
	cg19180602	chr17	72200560	RPL38	positive	1.68617e-22	0.0210528
	cg04821993	chr7	73002468	MLXIPL	positive	1.69941e-22	0.0184152
	cg05063395	chr8	18870993	PSD3	positive	1.70003e-22	0.000433349
	cg13452951	chr12	99289032	ANKS1B	positive	1.70708e-22	0.005831
	cg26971530	chr10	72431742	ADAMTS14	positive	1.71056e-22	0.0107932
	cg18491354	chr11	12398537	PARVA	positive	1.72252e-22	3.97148e-05
	cg10095242	chr8	54163622	OPRK1	positive	1.74536e-22	4.54805e-06
	cg08192831	chr14	94244881	PRIMA1	positive	1.75145e-22	0.00847572
	cg15125140	chr12	132851783	GALNT9	positive	1.76079e-22	0.0243912
	cg04887675	chr13	110956761	COL4A1	positive	1.77525e-22	0.0194408
	cg24005618	chr17	74075012	ZACN	positive	1.79233e-22	1.41855e-05
	cg14642210	chr8	30496128	SMIM18	negative	1.79608e-22	0.000708767
	cg19179379	chr16	27832255	GSG1L	positive	1.80017e-22	0.00569278
	cg04923020	chr12	46005007	LINC00938	positive	1.80135e-22	0.000118645
	cg16154155	chr8	25906990	PPP2R2A	positive	1.80636e-22	0.00599366
	cg17970933	chr18	61409206	SERPINB7	positive	1.81801e-22	0.0389777
	cg17307170	chr8	49333898	EFCAB1	positive	1.82266e-22	0.0074181
	cg14000891	chr14	51834213	LINC00640	positive	1.84591e-22	0.0013041
	cg11703283	chr17	80739659	TBCD	positive	1.84791e-22	0.000309993
	cg19851487	chr19	49655517	HRC	positive	1.85296e-22	0.00976805
	cg17456005	chr5	72608657	TMEM174	positive	1.86432e-22	0.0336468
	cg00146676	chr4	113442804	NEUROG2	positive	1.88355e-22	5.06547e-05
	cg10343060	chr7	155302850	CNPY1	positive	1.89363e-22	0.00548369
	cg24119225	chr5	140344483	PCDHAC1	positive	1.89548e-22	0.00333895
	cg13316619	chr15	73314754	NEO1	positive	1.89739e-22	0.0411251
	cg08907473	chr19	55727476	PTPRH	positive	1.91059e-22	0.00992694
	cg08542181	chr1	216419959	USH2A	positive	1.94242e-22	0.0271905
	cg03063015	chr6	96634353	FUT9	positive	1.95738e-22	0.00640297
	cg02953144	chr22	21138859	SERPIND1	positive	1.95851e-22	0.00136608
	cg24657523	chr15	48470754	MYEF2	positive	1.96432e-22	0.000357419
	cg15081566	chr11	111169865	COLCA2	positive	1.97316e-22	0.0177795
	cg08230268	chr16	7489771	RBFOX1	positive	2.00541e-22	0.03935
	cg08675757	chr4	165305782	MARCHF1	positive	2.00746e-22	0.0353044
	cg04880105	chr4	174687385	HAND2-AS1	positive	2.01601e-22	0.0168715
	cg01302668	chr6	117087238	FAM162B	positive	2.03097e-22	0.000372731
	cg19562321	chr5	150727045	SLC36A2	positive	2.03482e-22	0.0448805
	cg18978436	chr15	74144151	TBC1D21	positive	2.04063e-22	0.0307831
	cg04884090	chr3	49894441	TRAIP	positive	2.07916e-22	0.00834897
	cg13433250	chr2	63275954	EHBP1-AS1	positive	2.07932e-22	0.00820634
	cg08064076	chr17	41639983	ETV4	positive	2.09147e-22	5.36813e-10
	cg17321954	chr3	120626881	STXBP5L	positive	2.0949e-22	0.0129327
	cg14170793	chr1	229524651	ACTA1	positive	2.10849e-22	0.00654627
	cg11008866	chr3	121902442	CASR	positive	2.10969e-22	0.00163656
	cg21518803	chr11	102140601	YAP1	positive	2.11152e-22	4.52109e-06
	cg01173534	chr4	74300389	AFP	positive	2.11932e-22	0.0238307
	cg18565717	chr12	132910801	GALNT9	positive	2.13242e-22	0.0138125
	cg19178324	chr11	17759573	KCNC1	positive	2.14094e-22	0.0328854
	cg12801082	chr15	44117307	MFAP1	positive	2.14526e-22	0.000775766
	cg06472656	chr11	92074213	FAT3	positive	2.14601e-22	0.00281228
	cg18663091	chr5	1891695	IRX4	positive	2.14911e-22	0.00197517
	cg27360326	chr13	53422691	PCDH8	positive	2.15638e-22	0.0125012
	cg23134650	chr11	61278948	LRRC10B	positive	2.17144e-22	0.045318
	cg16091673	chr1	112425244	KCND3	positive	2.17772e-22	0.00212845
	cg16769369	chr7	35470300	LOC401324	positive	2.18618e-22	0.017176
	cg27167868	chr20	59618343	CDH4	positive	2.22317e-22	0.00130118
	cg06370528	chr18	34972877	CELF4	positive	2.22577e-22	0.00103231
	cg06592982	chr10	119443899	EMX2	positive	2.25101e-22	0.0294605
	cg16146322	chr2	131513144	AMER3	positive	2.27471e-22	0.00688361
	cg02272859	chr4	25656514	SLC34A2	positive	2.28056e-22	9.55281e-05
	cg23316449	chr14	73704055	PAPLN	positive	2.28061e-22	0.00292614
	cg14955976	chr11	41040030	LRRC4C	positive	2.28617e-22	0.00580525
	cg04752716	chr19	58728865	ZNF274	positive	2.29568e-22	0.0365479
	cg07003030	chr20	22565995	FOXA2	positive	2.30092e-22	0.000792559
	cg07744116	chr5	2184062	IRX4	positive	2.30539e-22	1.40602e-05
	cg07942492	chr4	113628127	LARP7	positive	2.3198e-22	0.00194954
	cg23152772	chr9	133813632	FIBCD1	positive	2.32818e-22	0.0121028
	cg03274601	chr10	102841051	TLX1NB	positive	2.32926e-22	0.00181906
	cg02894373	chr7	100824204	NAT16	positive	2.33112e-22	0.00713996
	cg05646117	chr10	127569567	DHX32	positive	2.34632e-22	0.0106741
	cg15971157	chr13	24464376	PCOTH	positive	2.34689e-22	0.0148349
	cg05122009	chr9	71650460	FXN	positive	2.35445e-22	0.038456
	cg11389172	chr10	50818299	CHAT	positive	2.41539e-22	0.0173028
	cg02291926	chr2	175259569	CIR1	positive	2.42771e-22	0.0465029
	cg23833452	chr6	146864752	RAB32	positive	2.436e-22	0.00903162
	cg21842524	chr13	29835030	MTUS2	positive	2.45724e-22	0.00352007
	cg10595547	chr10	119310911	EMX2	positive	2.46901e-22	0.0125666
	cg00363845	chr19	17446137	GTPBP3	positive	2.47908e-22	0.0178647
	cg19692314	chr1	45042285	RNF220	positive	2.48441e-22	0.0406073
	cg07573209	chr15	76630095	ISL2	positive	2.50836e-22	0.00179982
	cg15759567	chr5	42074454	FBXO4	positive	2.55579e-22	0.00515675
	cg01072952	chr5	83679364	EDIL3	positive	2.55941e-22	0.0285061
	cg03176520	chr2	220409474	TMEM198	positive	2.56128e-22	0.00467387
	cg26454150	chr13	100642408	ZIC2	positive	2.57055e-22	0.00826354
	cg22388982	chr2	228029517	COL4A3	positive	2.59693e-22	0.0319231
	cg03117976	chr18	11149435	PIEZO2	positive	2.60164e-22	0.000120043
	cg04968650	chr12	16430768	SLC15A5	positive	2.60906e-22	6.27739e-05
	cg25196575	chr1	3649250	TP73	positive	2.62103e-22	0.000428856
	cg12269138	chr6	116118279	FRK	positive	2.62554e-22	0.000706767
	cg12631713	chr1	4771985	AJAP1	positive	2.62853e-22	0.0142782
	cg19445726	chr12	57609481	NXPH4	positive	2.66159e-22	0.0102936
	cg26715644	chr19	12941409	RTBDN	positive	2.66297e-22	0.035258
	cg09133028	chr12	71003836	PTPRB	positive	2.67342e-22	0.0123866
	cg25757707	chr16	2031237	NOXO1	positive	2.68919e-22	0.0183964
	cg05008139	chr10	106527124	SORCS3	positive	2.73535e-22	0.00375484
	cg24357463	chr17	59478953	TBX2	positive	2.74331e-22	0.00483989
	cg18798289	chr5	72530245	TMEM174	positive	2.75618e-22	6.7872e-06
	cg07295964	chr5	175223982	CPLX2	positive	2.76407e-22	0.0187513
	cg02351145	chr9	89140327	TUT7	positive	2.77807e-22	0.0170382
	cg03216118	chr6	135231591	ALDH8A1	positive	2.77951e-22	0.0136603
	cg08290334	chr5	154909027	SGCD	positive	2.77981e-22	0.00503049
	cg18876007	chr1	75606694	LHX8	positive	2.78299e-22	0.000740379
	cg01456609	chr16	25700781	HS3ST4	positive	2.80599e-22	0.00331511
	cg21412923	chr17	12523721	LINC00670	positive	2.80858e-22	0.0133015
	cg23796177	chr1	74365062	LRRIQ3	positive	2.80881e-22	0.00174254
	cg13494498	chr16	89990214	TUBB3	positive	2.81079e-22	0.0346427
	cg12894427	chr11	63539183	ZFTA	positive	2.83032e-22	0.00607936
	cg05394509	chr9	140062307	GRIN1	positive	2.84538e-22	0.0101746
	cg26750594	chr5	111518718	EPB41L4A	positive	2.84784e-22	0.0204151
	cg09053680	chr10	135044114	UTF1	positive	2.84873e-22	0.00309393
	cg02878414	chr2	71099177	VAX2	positive	2.85071e-22	1.66462e-07
	cg05746865	chr17	43967193	MAP3K14	positive	2.86302e-22	0.0026357
	cg22155786	chr13	110992996	COL4A2	positive	2.86633e-22	0.000461516
	cg10002945	chr4	103184212	SLC39A8	positive	2.87504e-22	0.00744068
	cg21774926	chr6	160389454	IGF2R	positive	2.89152e-22	0.0154241
	cg08078997	chr12	53439952	LOC283335	positive	2.90131e-22	0.000566553
	cg13553343	chr11	66177637	NPAS4	positive	2.90933e-22	0.00319908
	cg09731113	chr17	12567873	MYOCD	positive	2.94073e-22	0.0170853
	cg07178143	chr7	79764735	GNAI1	positive	2.97435e-22	0.00268458
	cg13726459	chr12	54409657	HOXC4	positive	2.97574e-22	0.00826324
	cg08642088	chr10	114594641	VTI1A	positive	2.97872e-22	0.0138209
	cg26678970	chr13	79171469	OBI1-AS1	positive	2.99396e-22	0.00129291
	cg01085224	chr5	5139626	ADAMTS16	positive	3.00655e-22	0.0470582
	cg04707013	chr10	111177826	XPNPEP1	positive	3.01329e-22	0.0310834
	cg00016968	chr1	113250448	RHOC	positive	3.01941e-22	0.00295697
	cg12267558	chr15	89979910	RHCG	positive	3.02976e-22	0.0219729
	cg13758543	chr13	79169714	OBI1-AS1	positive	3.03459e-22	0.00136182
	cg11959694	chr2	98962564	CNGA3	positive	3.08204e-22	0.000116883
	cg26643142	chr12	54399494	HOXC9	positive	3.11182e-22	0.000117205
	cg17035881	chr13	25948477	ATP8A2	positive	3.11647e-22	0.00452767
	cg21200408	chr20	21378211	NKX2-4	positive	3.12344e-22	0.000486892
	cg06804033	chr16	71605834	TAT	positive	3.12412e-22	0.000194724
	cg07026904	chr11	114832606	CADM1	positive	3.13822e-22	0.000198567
	cg15911339	chr15	100923990	CERS3	positive	3.15474e-22	0.0141056
	cg14168923	chr13	28366606	GSX1	positive	3.16311e-22	0.00284204
	cg18842178	chr11	129400734	BARX2	positive	3.18409e-22	0.0329508
	cg10798267	chr2	240461061	HDAC4	positive	3.21467e-22	0.000144448
	cg16558214	chr13	110981828	COL4A2	positive	3.24611e-22	0.0490602
	cg22682811	chr20	21372462	XRN2	positive	3.24842e-22	0.0227418
	cg21165978	chr1	38079411	RSPO1	positive	3.28938e-22	0.00459572
	cg16459382	chr12	103407210	ASCL1	positive	3.31265e-22	0.0449524
	cg14537362	chr9	129376508	LMX1B	positive	3.32033e-22	0.0359448
	cg13776255	chr17	77248491	RBFOX3	positive	3.33907e-22	0.0370338
	cg26146027	chr3	24536889	THRB-AS1	positive	3.33978e-22	0.000941401
	cg07475922	chr19	10122694	RDH8	positive	3.34264e-22	0.0147932
	cg09434500	chr19	42502897	GRIK5	positive	3.35008e-22	0.000315858
	cg16699354	chr2	30142063	ALK	positive	3.36408e-22	0.000857899
	cg26594419	chr19	10122776	RDH8	positive	3.39886e-22	0.0214689
	cg24154326	chr20	30556611	XKR7	positive	3.4052e-22	0.0230134
	cg23331653	chr12	1929348	CACNA2D4	positive	3.4066e-22	0.0132295
	cg25781755	chr4	13537089	LINC01097	positive	3.41712e-22	0.0056582
	cg04496920	chr16	2032394	NOXO1	positive	3.43788e-22	0.00914478
	cg06144990	chr12	50347628	AQP2	positive	3.44318e-22	8.99654e-07
	cg16781205	chr14	102026543	MIR1247	positive	3.44547e-22	0.00590847
	cg00526276	chr16	14431423	MIR365A	positive	3.45509e-22	0.000822946
	cg14056644	chr4	111559105	PITX2	positive	3.4784e-22	0.00921295
	cg09371439	chr15	84322594	ADAMTSL3	positive	3.47898e-22	0.000155217
	cg21308069	chr19	4776988	MIR7-3HG	positive	3.48378e-22	0.000856767
	cg02631838	chr1	33358788	HPCA	positive	3.48403e-22	0.021166
	cg05373255	chr10	50873064	CHAT	positive	3.48551e-22	0.000539264
	cg19241168	chr3	33318720	FBXL2	positive	3.48769e-22	2.5703e-06
	cg12417685	chr3	68981852	TAFA4	positive	3.49215e-22	0.0267608
	cg19578342	chr9	139944174	ENTPD2	positive	3.50054e-22	0.000340962
	cg14468284	chr6	170411953	LOC154449	positive	3.5013e-22	0.000963973
	cg16277169	chr12	115112189	TBX3	positive	3.53141e-22	0.0357731
	cg01137619	chr2	121278904	LINC01101	positive	3.53665e-22	0.0467415
	cg18560283	chr12	44799477	TMEM117	positive	3.55409e-22	4.05378e-06
	cg14209041	chr17	56243567	OR4D2	positive	3.58911e-22	0.00288807
	cg27570738	chr12	132675017	GALNT9	positive	3.6133e-22	0.00630994
	cg11230006	chr17	41909714	MPP3	positive	3.64329e-22	0.000250877
	cg26110224	chr17	37845059	ERBB2	positive	3.6952e-22	0.0491749
	cg02682525	chr11	113258277	ANKK1	positive	3.74803e-22	0.00341884
	cg25576011	chr10	129535458	FOXI2	positive	3.7748e-22	5.5679e-05
	cg23983453	chr5	92925524	NR2F1	positive	3.78339e-22	4.14172e-05
	cg16882684	chr9	140145618	STPG3-AS1	positive	3.8076e-22	0.0322502
	cg25969814	chr15	91685225	SV2B	positive	3.83088e-22	0.0130738
	cg05801088	chr6	27534168	ZNF184	positive	3.88395e-22	0.00348237
	cg18833559	chr7	98199413	NPTX2	positive	3.90739e-22	0.000281411
	cg14455319	chr11	113258908	ANKK1	positive	3.91022e-22	0.0184417
[truncated: 28,691 more rows]
