# Supplementary material for: Epigenetic drift score captures directional methylation variability and links aging to transcriptional, metabolic, and genetic alterations
Source: HighWire-hosted journal article supplement (doi:10.1101/gr.280155.124), 2025-08-01
Supplement: Supplemental_Table_S4.xlsx [file Supplemental_Table_S4.xlsx]

## Sheet: Supplemental_Table_S4
	Supplemental Table S4. Drift-CpGs list composing EDS_POS.
	ix	CpG	Chr	Mbp	CpG closest gene	Type	whiteP.NSPT	whiteP.CAS	coef
	1	cg19809499	chr1	47882265	FOXE3	positive	6.27015e-28	5.312e-08	393.542
	2	cg11856822	chr1	247274777	LINC02897	positive	6.54134e-27	0.00374442	165.972
	3	cg03017091	chr1	41119283	RIMS3	positive	1.13259e-21	0.000209301	55.6487
	4	cg04453065	chr1	86046661	CCN1	positive	5.98821e-23	8.33995e-05	124.948
	5	cg14846442	chr1	182653495	RGS8	positive	9.22144e-17	0.000402052	20.0677
	6	cg21396646	chr1	234039761	SLC35F3	positive	1.31021e-18	0.000375154	22.7892
	7	cg07670736	chr1	95537846	ALG14	positive	5.45381e-17	0.00106263	43.8456
	8	cg16173186	chr1	5540565	NA	positive	1.3327e-19	0.00144554	31.7147
	9	cg21778518	chr1	149153467	LINC02591	positive	1.29306e-16	0.00912704	163.109
	10	cg22793142	chr1	207995752	LOC148696	positive	4.13657e-16	0.0247584	325.969
	11	cg20707222	chr1	76540222	ST6GALNAC3	positive	2.00521e-15	0.0019394	343.999
	12	cg14962509	chr1	36039655	TFAP2E	positive	1.22667e-08	0.0351062	38.2609
	13	cg10950358	chr1	147253401	NA	positive	2.55239e-10	0.00548481	11.7978
	14	cg10627839	chr1	196866512	CFHR4	positive	8.90204e-13	0.0261808	18.2267
	15	cg14838433	chr1	55446303	TMEM61	positive	3.71768e-12	0.00031886	50.0181
	16	cg00405069	chr1	52455390	RAB3B	positive	1.55756e-11	0.00175586	373.218
	17	cg26802564	chr1	30446406	MATN1	positive	4.5954e-10	0.000918883	14.5336
	18	cg03784956	chr1	228785238	DUSP5P1	positive	3.36749e-09	0.0124	136.2
	19	cg01084500	chr1	244973602	COX20	positive	8.48509e-10	0.0294309	45.5579
	20	cg11912591	chr1	245710332	KIF26B	positive	6.25623e-11	0.0302156	103.415
	21	cg13065624	chr1	170253617	LINC01142	positive	4.50928e-09	0.0073346	73.0159
	22	cg03689092	chr2	128439345	LIMS2	positive	1.51403e-30	0.0021434	50.6944
	23	cg22158769	chr2	39187539	ARHGEF33	positive	1.26598e-30	0.00168932	824.895
	24	cg25694915	chr2	169658981	NOSTRIN	positive	1.21232e-21	0.000706595	74.8004
	25	cg14548858	chr2	164331602	FIGN	positive	1.03761e-19	4.60403e-05	148.556
	26	cg10883069	chr2	241771040	KIF1A	positive	1.90998e-18	0.000877959	27.2138
	27	cg18866599	chr2	208635723	FZD5	positive	1.76548e-13	6.89317e-05	1451.14
	28	cg04707706	chr2	50575326	NRXN1	positive	9.0994e-16	0.0253719	63.684
	29	cg14789259	chr2	14773457	LRATD1	positive	2.91854e-16	0.0327824	70.5927
	30	cg04431946	chr2	47797569	MSH2	positive	3.99337e-15	0.000239712	75.7523
	31	cg13952656	chr2	232260762	B3GNT7	positive	6.17401e-17	0.00233988	722.623
	32	cg02870945	chr2	86565124	REEP1	positive	1.32119e-13	0.018343	266.141
	33	cg09118932	chr2	1748337	PXDN	positive	2.75988e-18	0.0477122	247.272
	34	cg03034070	chr2	190044841	COL5A2	positive	7.08447e-15	0.0237106	2.07683
	35	cg07205374	chr2	180129612	SESTD1	positive	5.45533e-16	0.00547528	367.098
	36	cg19302722	chr2	119067753	INSIG2	positive	3.92041e-16	0.00859133	3421.82
	37	cg02984430	chr2	10219586	CYS1	positive	8.9237e-12	0.000363398	6.83983
	38	cg22611163	chr2	201829094	ORC2	positive	6.34975e-09	0.0104991	19.0606
	39	cg19978550	chr2	158453812	ACVR1C	positive	3.32087e-10	0.00158315	4.19765
	40	cg22538712	chr2	5216945	LINC01249	positive	6.89297e-12	0.000577208	72.0604
	41	cg16435910	chr2	174488472	CDCA7	positive	2.96652e-10	0.00185348	560.417
	42	cg09613281	chr2	9227279	MBOAT2	positive	2.75211e-10	0.00103844	51.6565
	43	cg00042263	chr2	118503396	DDX18	positive	2.08335e-09	0.00469667	176.031
	44	cg11540341	chr2	145090579	GTDC1	positive	1.03123e-07	0.0104198	408.938
	45	cg06911020	chr3	39851123	MYRIP	positive	1.20112e-35	0.00153539	81.2096
	46	cg05531255	chr3	167967782	EGFEM1P	positive	3.77544e-33	0.000378742	566.833
	47	cg08234618	chr3	133464842	TF	positive	2.29333e-20	6.07475e-05	44.133
	48	cg23513600	chr3	171171401	TNIK	positive	5.20975e-14	0.025051	55.2576
	49	cg04125341	chr3	139656251	CLSTN2	positive	2.0738e-15	0.00235	72.6285
	50	cg07582825	chr3	152769889	RAP2B	positive	2.06083e-15	8.91552e-05	306.546
	51	cg13889007	chr3	53194139	PRKCD	positive	1.94615e-11	0.000735286	282.211
	52	cg19727641	chr3	138067606	MRAS	positive	5.48581e-14	0.0486741	66.5659
	53	cg04337056	chr3	158361858	GFM1	positive	2.21862e-12	0.000388323	206.372
	54	cg27410952	chr3	98620265	DCBLD2	positive	1.96404e-10	0.00443363	584.74
	55	cg06671690	chr3	141378777	RASA2	positive	8.21659e-10	0.0436068	1155.34
	56	cg23543123	chr4	48485569	SLC10A4	positive	4.98022e-28	0.00493195	301.38
	57	cg16999370	chr4	122302232	QRFPR	positive	4.03491e-16	0.00113162	80.0284
	58	cg20045888	chr4	151000084	DCLK2	positive	1.94549e-15	0.00475801	274.933
	59	cg08750951	chr4	89378894	HERC5	positive	5.14734e-14	0.0329396	676.585
	60	cg06452184	chr4	62924397	ADGRL3	positive	1.38687e-11	0.00232577	61.4031
	61	cg17255450	chr4	5710372	EVC2	positive	1.23429e-12	0.0428126	48.0944
	62	cg13802354	chr4	36191938	ARAP2	positive	1.13298e-08	0.00563426	34.0652
	63	cg15689795	chr4	2439478	CFAP99	positive	1.75363e-08	0.00243359	181.28
	64	cg15351009	chr5	191486	LRRC14B	positive	2.43336e-29	0.000307393	37.6774
	65	cg01085224	chr5	5139626	ADAMTS16	positive	3.00655e-22	0.0470582	1.59454
	66	cg18909295	chr5	175223293	CPLX2	positive	5.02045e-22	2.7455e-05	47.2528
	67	cg11404058	chr5	14011843	DNAH5	positive	1.14112e-24	0.000996091	149.592
	68	cg04974775	chr5	114516854	TRIM36	positive	7.4641e-20	0.00228041	84.4485
	69	cg12980795	chr5	85056547	NBPF22P	positive	8.1661e-17	0.00212653	43.6285
	70	cg24897141	chr5	139283199	NRG2	positive	6.25562e-20	0.0419963	13.8195
	71	cg12035880	chr5	6447235	UBE2QL1	positive	5.56471e-19	0.0288195	59.1936
	72	cg17814758	chr5	45192536	HCN1	positive	4.07354e-17	0.019631	1.6856
	73	cg12533363	chr5	57756026	PLK2	positive	4.99763e-14	0.00555874	141.443
	74	cg23958684	chr5	112631526	MCC	positive	8.4493e-09	0.000137703	443.286
	75	cg25324653	chr5	42175368	FBXO4	positive	1.569e-09	0.0152893	382.961
	76	cg06392169	chr6	391936	IRF4	positive	1.1341e-17	0.00394224	1334.06
	77	cg00135293	chr6	102088363	GRIK2	positive	1.70313e-24	0.0200574	6.37052
	78	cg01302668	chr6	117087238	FAM162B	positive	2.03097e-22	0.000372731	14.2843
	79	cg18468088	chr6	35490818	TULP1	positive	9.61496e-20	0.00130855	464.788
	80	cg01596289	chr6	163520766	PACRG	positive	6.59779e-19	0.00442612	36.1602
	81	cg16912957	chr6	30124214	GPX6	positive	2.09853e-13	0.000474052	26.9924
	82	cg07177174	chr6	161088755	LPA	positive	3.94134e-17	0.00823522	112.166
	83	cg15980539	chr6	152128865	ESR1	positive	3.8307e-18	0.00308979	257.065
	84	cg12257233	chr6	29597083	GPX6	positive	8.26554e-10	0.00138674	8.8067
	85	cg03778398	chr6	136547040	MTFR2	positive	3.29167e-15	0.00335101	3.6311
	86	cg03330552	chr6	3849028	FAM50B	positive	2.7179e-09	0.00860325	80.824
	87	cg10457440	chr6	26663660	ZNF322	positive	2.00156e-10	0.0215997	82.3716
	88	cg25009842	chr6	157505558	ARID1B	positive	2.63207e-12	0.0238599	76.0073
	89	cg22550299	chr6	169654842	THBS2	positive	5.16908e-11	0.0180167	7.85303
	90	cg26759954	chr6	13925420	RNF182	positive	1.9873e-11	0.00051417	20.7541
	91	cg05846476	chr6	80655418	ELOVL4	positive	2.1014e-11	0.00290114	79.8164
	92	cg09105802	chr6	112575230	LAMA4	positive	2.16747e-08	0.000385899	1097.82
	93	cg21186299	chr7	100808810	VGF	positive	1.66793e-32	0.0260073	13063.2
	94	cg08992229	chr7	126866923	GRM8	positive	4.28846e-22	0.000558494	10.9169
	95	cg11983867	chr7	22539820	STEAP1B	positive	2.07639e-10	0.00166062	675.101
	96	cg18419175	chr7	6199980	USP42	positive	5.88373e-12	0.0178491	2.37077
	97	cg07482935	chr7	103630013	RELN	positive	4.18365e-18	0.00183562	563.22
	98	cg23975887	chr7	56516504	LOC650226	positive	2.99102e-10	0.000983789	35.2387
	99	cg25565476	chr7	106270744	CCDC71L	positive	4.59907e-09	0.0280918	44.8792
	100	cg03694157	chr7	73867831	GTF2IRD1	positive	2.41528e-12	0.000844461	325.681
	101	cg20897119	chr7	116164422	CAV1	positive	5.51687e-09	0.00166024	120.482
	102	cg19055436	chr7	99559579	AZGP1	positive	4.19419e-10	0.0249526	80.7821
	103	cg02433785	chr7	39662467	RALA	positive	7.37034e-10	0.000139515	126.079
	104	cg16453056	chr7	76145632	NA	positive	1.10042e-11	0.00523263	49.3465
	105	cg18676273	chr7	41732833	INHBA	positive	1.25376e-08	0.00157482	167.322
	106	cg03063710	chr7	95705054	DYNC1I1	positive	3.50246e-08	3.1454e-05	1594.02
	107	cg20238105	chr7	141870429	MGAM2	positive	1.39458e-09	0.0310886	0.35823
	108	cg17304025	chr7	143699825	OR6B1	positive	4.36343e-09	0.0372479	29.3147
	109	cg17533232	chr7	120852287	CPED1	positive	7.96812e-09	0.031963	228.52
	110	cg06059616	chr8	109092720	RSPO2	positive	1.272e-24	8.44188e-05	6.20056
	111	cg21859781	chr8	97173034	GDF6	positive	2.76716e-24	3.32731e-05	95.0714
	112	cg26005485	chr8	139508496	FAM135B	positive	1.00532e-18	2.33403e-05	63.1961
	113	cg14930075	chr8	140715018	KCNK9	positive	3.19259e-18	0.0142222	405.178
	114	cg15634698	chr8	43131656	POTEA	positive	6.29605e-17	0.00492832	1.10212
	115	cg18159666	chr8	29177713	DUSP4	positive	1.56733e-11	0.00519104	11.6068
	116	cg12330330	chr8	79428569	PKIA	positive	6.4311e-14	0.00847933	1325.37
	117	cg00631327	chr8	3965218	CSMD1	positive	8.89416e-09	0.00158971	197.457
	118	cg14243623	chr9	90341158	CTSL	positive	6.12371e-24	0.0160639	316.397
	119	cg14022501	chr9	137335080	RXRA	positive	1.69552e-11	0.00173781	31.4948
	120	cg13397939	chr9	91273538	LINC02843	positive	4.36273e-10	0.0263413	147.699
	121	cg14089436	chr9	20624421	MLLT3	positive	7.28724e-08	0.00446266	13.5057
	122	cg02116255	chr9	73032750	KLF9	positive	5.61326e-09	0.0304836	108.992
	123	cg23039195	chr10	22624663	COMMD3-BMI1	positive	3.16832e-26	0.0299303	895.582
	124	cg04832177	chr10	77155143	ZNF503	positive	1.31279e-23	0.00635617	3.12497
	125	cg20724107	chr10	104151019	NFKB2	positive	1.25026e-13	0.0162839	84.2738
	126	cg09658720	chr10	48396538	PTPN20	positive	3.01002e-12	0.00434438	93.2187
	127	cg07098752	chr10	120354870	PRLHR	positive	2.99738e-15	0.0264569	79.4385
	128	cg27426287	chr10	30025782	SVIL	positive	1.16847e-13	0.0400714	270.777
	129	cg00500564	chr10	128994030	DOCK1	positive	2.23138e-11	4.49063e-05	187.29
	130	cg00744172	chr10	54643889	MBL2	positive	2.3914e-10	0.00863356	108.004
	131	cg02209288	chr10	100265267	HPSE2	positive	2.03955e-11	0.00807088	39.2045
	132	cg04926904	chr10	14529831	FRMD4A	positive	2.63795e-08	0.0314585	213.93
	133	cg14197503	chr10	2777072	PFKP	positive	6.371e-08	0.00272976	334.965
	134	cg02353154	chr10	124578028	FAM24B-CUZD1	positive	5.28421e-08	0.00741666	180.719
	135	cg17236169	chr11	64480683	NRXN2	positive	4.12627e-27	0.0125663	33.2616
	136	cg17524136	chr11	84028382	DLG2	positive	2.55378e-20	0.000499962	6.01907
	137	cg15580724	chr11	100557996	ARHGAP42	positive	3.60485e-21	0.000252577	65.4285
	138	cg17838516	chr11	92703536	MTNR1B	positive	1.44806e-15	0.00743048	6.48606
	139	cg07470968	chr11	29207078	KCNA4	positive	3.0111e-15	0.000165592	83.5526
	140	cg18411891	chr11	86666000	FZD4	positive	5.07767e-17	0.0103194	1481.46
	141	cg06122148	chr11	98891553	CNTN5	positive	6.81866e-15	0.0130687	145.038
	142	cg13646917	chr11	48001761	PTPRJ	positive	7.63204e-08	0.0216949	151.112
	143	cg27560292	chr11	6632884	TAF10	positive	1.06297e-10	0.0357455	422.357
	144	cg15489541	chr11	57508451	TMX2-CTNND1	positive	6.29883e-08	0.00541244	41.7382
	145	cg24535475	chr12	7167900	C1S	positive	1.35979e-19	0.014889	167.56
	146	cg17472736	chr12	16135031	DERA	positive	4.02309e-21	0.0399104	340.815
	147	cg15697849	chr12	45445200	DBX2	positive	6.43202e-17	1.50257e-05	296.431
	148	cg03537872	chr12	109459024	SVOP	positive	3.73652e-12	0.000359978	21.3501
	149	cg25023291	chr12	11339792	PRB4	positive	3.31864e-15	0.000254278	89.4196
	150	cg02593205	chr12	26348343	SSPN	positive	3.04878e-14	0.0388167	52.9148
	151	cg23752086	chr12	20522177	PDE3A	positive	2.47494e-09	0.00110023	370.496
	152	cg01399598	chr12	86727874	MGAT4C	positive	1.46248e-10	5.31754e-05	96.4789
	153	cg13798384	chr13	67636112	PCDH9	positive	4.03889e-26	0.01877	231.256
	154	cg03356172	chr13	36049380	MIR548F5	positive	3.35776e-17	0.026738	69.5852
	155	cg01657556	chr13	52419483	TMEM272	positive	3.44935e-17	0.000499987	72.204
	156	cg12431496	chr13	56138482	MIR5007	positive	8.16526e-15	1.36501e-05	7.78784
	157	cg15948377	chr13	32237930	RXFP2	positive	9.5301e-17	0.030862	11.5148
	158	cg18252102	chr13	98796790	FARP1	positive	3.99694e-09	0.0160677	294.837
	159	cg12271981	chr13	88326752	SLITRK5	positive	9.32657e-11	0.0132626	61.6753
	160	cg24287239	chr13	43148278	TNFSF11	positive	6.77941e-09	0.0410324	16.5884
	161	cg16379910	chr14	78636730	NRXN3	positive	2.48883e-39	0.0063753	387.121
	162	cg05019423	chr14	105330230	CEP170B	positive	2.04271e-17	0.0161829	15.0915
	163	cg05576328	chr14	24046085	JPH4	positive	2.12435e-14	0.0258244	239.817
	164	cg20068496	chr14	78108822	SPTLC2	positive	6.4448e-15	0.000147334	7.28407
	165	cg19509763	chr14	50320632	NEMF	positive	9.60937e-16	0.0131427	103.061
	166	cg09359810	chr14	52048421	FRMD6-AS2	positive	5.50982e-13	0.00567505	38.0372
	167	cg23280155	chr14	72219812	SIPA1L1	positive	1.86359e-08	0.0130604	105.66
	168	cg25885971	chr15	83348741	CPEB1-AS1	positive	7.48565e-22	0.0222692	8.05146
	169	cg00288824	chr15	26108663	ATP10A	positive	1.03752e-16	3.58796e-05	514.709
	170	cg07042267	chr15	99190557	IGF1R	positive	9.84715e-13	0.0172806	854.656
	171	cg04460984	chr15	78933630	CHRNB4	positive	4.96488e-13	0.0241281	34.2704
	172	cg18010520	chr15	29311612	APBA2	positive	1.16966e-10	0.030415	310.866
	173	cg02443658	chr16	28986829	SPNS1	positive	1.3561e-13	0.000152168	53.2417
	174	cg10079740	chr16	55513480	MMP2	positive	1.3421e-22	0.0030909	19.9842
	175	cg00423443	chr16	82660376	CDH13	positive	2.03836e-14	0.0271113	96.5893
	176	cg09620131	chr16	9248481	C16orf72	positive	9.68623e-14	0.00537069	60.52
	177	cg08573648	chr16	70720079	MTSS2	positive	6.43522e-14	0.000159135	54.586
	178	cg27247934	chr16	89104794	ACSF3	positive	1.09585e-10	0.00548503	124.542
	179	cg05093711	chr16	10674008	EMP2	positive	6.18623e-10	0.0262484	551.656
	180	cg16441900	chr17	750848	NXN	positive	9.60785e-26	0.0035996	0.846479
	181	cg19401340	chr17	56833197	PPM1E	positive	7.96593e-20	0.0097039	2408.14
	182	cg04196345	chr17	42084953	NAGS	positive	4.98061e-15	0.0128469	597.725
	183	cg14630905	chr17	44928992	WNT9B	positive	1.02493e-21	0.000888901	371.146
	184	cg08076044	chr17	26685074	TMEM199	positive	1.47834e-15	0.00679612	4.33515
	185	cg02962952	chr17	75789439	LINC01973	positive	5.49051e-16	0.0210653	15.406
	186	cg03242666	chr17	15168570	PMP22	positive	4.19524e-16	0.00954634	159.241
	187	cg05651778	chr17	60729731	MRC2	positive	1.75573e-16	0.000133214	21.5102
	188	cg09309269	chr17	30770961	PSMD11	positive	3.85902e-15	0.0188574	1.12147
	189	cg10187674	chr17	67323922	ABCA5	positive	2.65305e-11	0.0024263	174.572
	190	cg23163283	chr17	22016686	MTRNR2L1	positive	3.1449e-12	0.007347	19.4701
	191	cg03660901	chr18	76473146	SALL3	positive	9.61596e-18	0.000931321	5.05872
	192	cg03159124	chr18	7118077	LAMA1	positive	4.44206e-16	0.0179712	237.132
	193	cg01226265	chr18	72123958	DIPK1C	positive	4.6795e-16	0.010986	726.868
	194	cg06595072	chr18	61670207	SERPINB8	positive	2.79388e-11	0.0459468	41.2356
	195	cg13164537	chr18	67624071	CD226	positive	1.24487e-13	0.044579	18.3811
	196	cg17889586	chr19	50794207	MYH14	positive	1.09575e-21	2.73158e-07	68.9287
	197	cg16644497	chr19	35263701	ZNF599	positive	2.73239e-15	0.041841	326.394
	198	cg10693865	chr19	55574951	RDH13	positive	1.45209e-11	0.000346445	76.4138
	199	cg18488075	chr19	44555367	ZNF284	positive	1.34401e-11	0.00159496	140.327
	200	cg27175386	chr19	24155489	ZNF726	positive	6.50797e-08	0.00746238	390.67
	201	cg23588360	chr20	59545914	CDH4	positive	7.13942e-08	0.000571428	175.598
	202	cg11528328	chr21	36041683	CLIC6	positive	3.57364e-17	0.0030612	81.4121
	203	cg08846592	chr21	46439342	PICSAR	positive	4.30974e-10	0.000642356	43.5082
	204	cg01337931	chr22	32651693	SLC5A4	positive	1.82268e-08	0.0356685	21.7233
