# Supplementary material for: Epigenetic drift score captures directional methylation variability and links aging to transcriptional, metabolic, and genetic alterations
Source: HighWire-hosted journal article supplement (doi:10.1101/gr.280155.124), 2025-08-01
Supplement: Supplemental_Table_S5.xlsx [file Supplemental_Table_S5.xlsx]

## Sheet: Supplemental_Table_S5
	Supplemental Table S5. Drift-CpGs list composing EDS_NEG.
	ix	CpG	Chr	Mbp	CpG closest gene	Type	whiteP.NSPT	coef
	1	cg19996105	chr1	190723988	LINC01720	negative	1.617e-09	207.373
	2	cg02896872	chr1	226887044	ITPKB	negative	2.76579e-09	141.509
	3	cg04013758	chr1	228330678	GUK1	negative	2.20727e-09	691.071
	4	cg22051913	chr2	430055	ALKAL2	negative	1.4055e-10	5720.6
	5	cg00052964	chr2	85135823	TMSB10	negative	9.93462e-09	617.128
	6	cg19607918	chr2	97303065	KANSL3	negative	2.85007e-08	405.326
	7	cg16267679	chr2	145278615	ZEB2-AS1	negative	2.79463e-10	190.72
	8	cg00711795	chr2	234308665	DGKD	negative	2.08525e-09	863.666
	9	cg13993467	chr3	3010002	CNTN4	negative	4.93583e-10	259.372
	10	cg07504615	chr3	14832729	C3orf20	negative	5.61638e-08	684.983
	11	cg02255107	chr3	16347334	OXNAD1	negative	4.2653e-09	359.31
	12	cg03630790	chr3	30702018	TGFBR2	negative	5.63434e-09	2164.97
	13	cg08271909	chr4	155661691	LRAT	negative	9.98257e-15	2324.27
	14	cg16902294	chr4	155661932	LRAT	negative	6.5295e-11	3694.21
	15	cg09017434	chr5	16179660	MARCHF11	negative	1.23004e-12	299.962
	16	cg07195404	chr5	35861971	IL7R	negative	2.89913e-10	10.0292
	17	cg01329519	chr5	52599032	FST	negative	1.20263e-11	822.973
	18	cg21878650	chr5	64558623	ADAMTS6	negative	1.75448e-12	106.733
	19	cg10598456	chr5	88589895	MEF2C	negative	8.54513e-08	1319.8
	20	cg02072492	chr5	95063827	RHOBTB3	negative	1.08188e-09	938.232
	21	cg22009908	chr5	106724064	EFNA5	negative	2.54975e-09	329.26
	22	cg06493985	chr5	139672838	PFDN1	negative	1.04398e-11	260.036
	23	cg16700632	chr5	143583590	KCTD16	negative	5.91809e-10	10159.5
	24	cg15035705	chr5	179159291	MAML1	negative	3.16624e-08	3948.75
	25	cg01113988	chr6	106035528	PREP	negative	1.21178e-12	983.222
	26	cg01896804	chr6	136203097	PDE7B	negative	6.88958e-08	16415.9
	27	cg04837005	chr6	152659776	SYNE1	negative	6.6778e-09	18539.5
	28	cg00988187	chr6	164463323	QKI	negative	9.72223e-10	315.201
	29	cg11647481	chr7	4781704	FOXK1	negative	1.05134e-08	5519.66
	30	cg05498680	chr7	7142996	LOC100131257	negative	1.77922e-13	348.356
	31	cg13931228	chr7	24612418	PALS2	negative	2.41201e-17	100.647
	32	cg05851442	chr7	27153212	HOXA3	negative	2.98841e-13	7533.11
	33	cg20789819	chr7	130516373	NA	negative	6.60198e-08	1644.75
	34	cg25194099	chr7	142977104	TMEM139	negative	6.52169e-08	2026.85
	35	cg15934900	chr8	8939839	MIR4660	negative	5.31338e-08	6196.45
	36	cg07302230	chr8	31453867	NRG1	negative	2.86243e-08	3641.16
	37	cg11246419	chr8	91180189	LINC00534	negative	2.67958e-17	109.002
	38	cg09740379	chr9	115920384	SLC31A2	negative	2.30311e-09	78.2962
	39	cg13558912	chr9	130723444	EEIG1	negative	1.91206e-08	89.2831
	40	cg02027349	chr9	131222418	ODF2	negative	4.73337e-14	894.184
	41	cg19118077	chr10	5137178	AKR1C3	negative	1.39733e-08	1015.19
	42	cg21596083	chr11	6639971	TPP1	negative	3.55981e-08	10281.4
	43	cg27301756	chr11	11285320	GALNT18	negative	2.0964e-08	2497.34
	44	cg15213052	chr11	57549269	TMX2-CTNND1	negative	1.56914e-11	2552.35
	45	cg17370876	chr11	62285730	AHNAK	negative	1.5401e-12	337.26
	46	cg03092399	chr11	108149307	ATM	negative	3.78838e-08	2719.69
	47	cg16540258	chr12	27975175	KLHL42	negative	3.66672e-11	16028.1
	48	cg19019403	chr12	31899879	AMN1	negative	2.67838e-08	752.937
	49	cg22810917	chr12	56618626	NABP2	negative	3.00589e-15	6533.97
	50	cg19848940	chr12	112250795	ALDH2	negative	2.16735e-08	281.767
	51	cg24532476	chr12	133424566	CHFR	negative	1.05581e-08	25828.1
	52	cg26344933	chr13	45012423	TSC22D1	negative	4.62094e-08	713.901
	53	cg06117039	chr13	99113019	STK24	negative	4.63223e-08	1586.61
	54	cg03156020	chr13	100018983	MIR548AN	negative	8.43432e-08	117.793
	55	cg11718796	chr13	103257199	TPP2	negative	1.41645e-08	1662
	56	cg00419061	chr14	25135098	GZMB	negative	3.94926e-09	832.6
	57	cg02322229	chr14	64669716	SYNE2	negative	3.35589e-09	16126.7
	58	cg09948946	chr14	100551066	EVL	negative	7.58789e-08	5033.44
	59	cg12978587	chr15	28983737	WHAMMP2	negative	1.13637e-11	3947.11
	60	cg25358230	chr15	28983740	WHAMMP2	negative	1.01042e-13	2200.59
	61	cg03018028	chr15	42787288	SNAP23	negative	1.35179e-20	119.848
	62	cg09628822	chr15	60803663	RORA	negative	7.65294e-08	3704.16
	63	cg14335536	chr15	93347244	ASB9P1	negative	3.26266e-09	180.264
	64	cg02672962	chr16	3665541	SLX4	negative	2.98773e-09	1073.74
	65	cg03471455	chr16	23435747	COG7	negative	5.95114e-16	3855.97
	66	cg26566137	chr16	28320404	SBK1	negative	1.0717e-08	6679.49
	67	cg08847738	chr16	53535767	AKTIP	negative	1.60298e-09	2616.6
	68	cg16411857	chr16	57023191	NLRC5	negative	1.03274e-07	1685.87
	69	cg07251783	chr16	82655543	CDH13	negative	3.45143e-08	1144.04
	70	cg13785152	chr17	1992458	SMG6	negative	3.62151e-08	49.3001
	71	cg18943411	chr17	17024582	MPRIP	negative	4.56231e-10	1346.08
	72	cg14665825	chr17	28155267	SSH2	negative	8.07694e-09	16729
	73	cg24135615	chr17	37042201	LASP1	negative	1.42537e-13	95.4022
	74	cg09341448	chr19	49164383	SEC1P	negative	2.68063e-09	1742.89
	75	cg21727276	chr20	44036723	DBNDD2	negative	4.88182e-11	5205.94
	76	cg11575350	chr21	25801028	LINC01692	negative	4.49518e-08	1414.84
	77	cg13329407	chr21	25801374	LINC01692	negative	4.40404e-16	68.7931
	78	cg22253547	chr21	40591928	BRWD1	negative	1.0839e-10	1798.05
	79	cg21361322	chr22	31500896	SELENOM	negative	3.04926e-12	1759.46
	80	cg21207019	chr22	38123886	TRIOBP	negative	4.70375e-08	1348.72
	81	cg16860464	chr22	40329214	GRAP2	negative	1.74723e-08	1949.72
