# Supplementary material for: Epigenetic drift score captures directional methylation variability and links aging to transcriptional, metabolic, and genetic alterations
Source: HighWire-hosted journal article supplement (doi:10.1101/gr.280155.124), 2025-08-01
Supplement: Supplemental_Table_S6.xlsx [file Supplemental_Table_S6.xlsx]

## Sheet: Supplemental_Table_S6
	Supplemental Table S6. Significant associations between epigenetic scores and lipid metabolism.
	Metabolite		Group	EpigeneticAge	Beta	SE	T	P	P_adjFDR
	ApoB/HDL-C	ApoB/HDL Cholesterol	Ratio	EDS_POS	-0.623972	0.196076	-3.1823	0.0014762	0.023111
	PN in ApoB	Particle Number in ApoB	Others	EDS_POS	-0.667398	0.212703	-3.13769	0.00171957	0.023111
	PN in ApoB	Particle Number in ApoB	Percentage	Dunedin	-0.300097	0.120816	-2.48391	0.0130497	0.0471845
	ApoA1	ApoA1	Others	Levine	-0.976041	0.285164	-3.42274	0.00062835	0.0223214
	ApoA1	ApoA1	Others	Dunedin	-0.618899	0.127031	-4.87202	1.16277e-06	3.90691e-05
	ApoA2	ApoA2	Others	Dunedin	-0.775526	0.125038	-6.2023	6.33802e-10	7.09858e-08
	ApoA2	ApoA2	Others	Levine	-1.391	0.281204	-4.94658	7.97432e-07	0.000169797
	ApoB	ApoB	Others	EDS_POS	-0.667575	0.212703	-3.13852	0.00171471	0.023111
	ApoB	ApoB	Others	Dunedin	-0.300063	0.120816	-2.48363	0.01306	0.0471845
	Cholesterol	Cholesterol	Others	EDS_POS	-0.698919	0.225609	-3.09792	0.00196713	0.0251599
	Cholesterol	Cholesterol	Others	Dunedin	-0.566231	0.127553	-4.43917	9.36076e-06	0.000209681
	CH/HDL-C	Cholesterol/HDL Cholesterol	Ratio	EDS_POS	-0.544525	0.200737	-2.71263	0.00671374	0.0371071
	CH in IDL, VLDL, LDL, HDL	Cholesterol in IDL, VLDL, LDL, HDL	Percentage	EDS_POS	-0.665708	0.225727	-2.94917	0.00321118	0.0287227
	CH in IDL, VLDL, LDL, HDL	Cholesterol in IDL, VLDL, LDL, HDL	Percentage	Dunedin	-0.584939	0.127728	-4.57959	4.85106e-06	0.000116425
	Citric acid	Citric acid	Others	Dunedin	-0.520406	0.108689	-4.78804	1.76667e-06	5.39637e-05
	FC in IDL, VLDL, LDL, HDL	Free Cholesterol in IDL, VLDL, LDL, HDL	Percentage	EDS_POS	-0.686913	0.214707	-3.1993	0.00139216	0.023111
	FC in IDL, VLDL, LDL, HDL	Free Cholesterol in IDL, VLDL, LDL, HDL	Percentage	Dunedin	-0.460094	0.121593	-3.78388	0.000157457	0.00170663
	Fischer ratio	Branched-chain amino acid/Aromatic amino acids	Ratio	Dunedin	-0.527793	0.128724	-4.1002	4.23905e-05	0.000678248
	Glucose	Glucose	Others	Levine	1.36853	0.279303	4.89982	1.0107e-06	0.000169797
	Glucose	Glucose	Others	Hannum	1.03485	0.266722	3.87989	0.000106773	0.0358758
	Glucose	Glucose	Others	Dunedin	0.473508	0.124537	3.80214	0.000146339	0.00163899
	Glutamine	Glutamine	Others	Dunedin	-0.254084	0.101044	-2.51457	0.0119705	0.0451918
	ApoA1 in HDL	ApoA1 in HDL	HDL	Dunedin	-0.597198	0.125481	-4.75928	2.03608e-06	5.70101e-05
	ApoA1 in HDL	ApoA1 in HDL	HDL	Levine	-0.996909	0.281592	-3.54026	0.000405892	0.0217882
	ApoA2 in HDL	ApoA2 in HDL	HDL	Levine	-1.24763	0.280808	-4.44301	9.19624e-06	0.00102998
	ApoA2 in HDL	ApoA2 in HDL	HDL	Dunedin	-0.717709	0.124934	-5.7447	1.01437e-08	4.39704e-07
	CE in HDL	Cholesterol Esters in HDL	HDL	Dunedin	-0.468947	0.112811	-4.15691	3.31698e-05	0.000557253
	HDL-C	HDL Cholesterol	Percentage	Dunedin	-0.411853	0.118916	-3.46341	0.000540964	0.00422707
	HDL/Total lipid	HDL/Total lipid (Phospholipids, Free Cholesterol, Triglycerides, Cholesterol)	HDL	Dunedin	-0.397755	0.118517	-3.35609	0.000800504	0.00584716
	PL in HDL	Phospholipids in HDL	HDL	Dunedin	-0.386314	0.116901	-3.30464	0.000962315	0.00653051
	ApoA1 in HDL-1	ApoA1 in HDL-1	HDL	EDS_POS	0.616094	0.214702	2.86953	0.0041402	0.0293204
	ApoA2 in HDL-1	ApoA2 in HDL-1	HDL	EDS_POS	0.584855	0.21243	2.75316	0.00593873	0.0344877
	CE in HDL-1	Cholesterol Esters in HDL-1	HDL	EDS_POS	0.571631	0.20769	2.75233	0.00595323	0.0344877
	CH in HDL-1/Total lipid in HDL-1	Cholesterol in HDL-1/Total lipid (Phospholipids, Free Cholesterol, Triglycerides, Cholesterol) in HDL-1	Ratio	EDS_POS	-0.655728	0.234447	-2.79691	0.00519266	0.0329195
	FC in HDL-1/Total lipid in HDL-1	Free Cholesterol in HDL-1/Total lipid (Phospholipids, Free Cholesterol, Triglycerides, Cholesterol) in HDL-1	Ratio	EDS_POS	-0.663088	0.205793	-3.22211	0.00128625	0.023111
	FC in HDL-1/Total lipid in HDL-1	Free Cholesterol in HDL-1/Total lipid (Phospholipids, Free Cholesterol, Triglycerides, Cholesterol) in HDL-1	Ratio	Dunedin	-0.301693	0.116467	-2.59038	0.00963378	0.040974
	Total lipid in HDL-1	Total lipid (Phospholipids, Free Cholesterol, Triglycerides, Cholesterol) in HDL-1	HDL	EDS_POS	0.597306	0.213516	2.79748	0.00518389	0.0329195
	PL in HDL-1	Phospholipids in HDL-1	HDL	EDS_POS	0.606597	0.210464	2.8822	0.00397787	0.0293204
	PL in HDL-1/Total lipid in HDL-1	Phospholipids in HDL-1/Total lipid (Phospholipids, Free Cholesterol, Triglycerides, Cholesterol) in HDL-1	Ratio	EDS_POS	0.551048	0.20773	2.65271	0.00802737	0.0428127
	TG in HDL-1	Triglycerides in HDL-1	HDL	EDS_POS	0.626701	0.225748	2.7761	0.00553604	0.0338353
	CH in HDL-2/Total lipid in HDL-2	Cholesterol in HDL-2/Total lipid (Phospholipids, Free Cholesterol, Triglycerides, Cholesterol) in HDL-2	Ratio	Dunedin	-0.333513	0.130136	-2.5628	0.0104318	0.0422546
	CH/TG in HDL-2	Cholesterol/Triglycerides in HDL-2	Ratio	Dunedin	-0.321909	0.123051	-2.61606	0.00894023	0.0395252
	TG in HDL-2/Total lipid in HDL-2	Triglycerides in HDL-2/Total lipid (Phospholipids, Free Cholesterol, Triglycerides, Cholesterol) in HDL-2	Ratio	Dunedin	0.311914	0.120245	2.59398	0.00953379	0.040974
	ApoA1 in HDL-3	ApoA1 in HDL-3	HDL	Dunedin	-0.416775	0.127087	-3.27945	0.00105215	0.00684365
	ApoA1 in HDL-3	ApoA1 in HDL-3	HDL	Levine	-0.868192	0.284949	-3.04683	0.0023331	0.0489951
	ApoA2 in HDL-3	ApoA2 in HDL-3	HDL	Dunedin	-0.351524	0.128316	-2.73951	0.00619004	0.0292937
	ApoA2 in HDL-3	ApoA2 in HDL-3	HDL	Levine	-0.964978	0.287041	-3.36181	0.000784193	0.0239535
	CE in HDL-3	Cholesterol Esters in HDL-3	HDL	Levine	-0.912195	0.267699	-3.40753	0.000664328	0.0223214
	CE in HDL-3	Cholesterol Esters in HDL-3	HDL	Dunedin	-0.369088	0.119486	-3.08897	0.00202724	0.0121635
	CH in HDL-3	Cholesterol in HDL-3	HDL	Levine	-0.893612	0.272463	-3.27975	0.00105099	0.0254495
	CH in HDL-3	Cholesterol in HDL-3	HDL	Dunedin	-0.436555	0.121306	-3.59881	0.000324908	0.00287287
	FC in HDL-3	Free Cholesterol in HDL-3	HDL	Dunedin	-0.514536	0.123125	-4.17899	3.01328e-05	0.000532875
	FC in HDL-3/Total lipid in HDL-3	Free Cholesterol in HDL-3/Total lipid (Phospholipids, Free Cholesterol, Triglycerides, Cholesterol) in HDL-3	Ratio	Dunedin	-0.442068	0.11929	-3.70581	0.000214592	0.00225322
	Total lipid in HDL-3	Total lipid (Phospholipids, Free Cholesterol, Triglycerides, Cholesterol) in HDL-3	HDL	Dunedin	-0.342249	0.123551	-2.77011	0.00563863	0.0274577
	PL in HDL-3	Phospholipids in HDL-3	HDL	Dunedin	-0.312298	0.122569	-2.54794	0.010886	0.0424872
	TG in HDL-3/Total lipid in HDL-3	Triglycerides in HDL-3/Total lipid (Phospholipids, Free Cholesterol, Triglycerides, Cholesterol) in HDL-3	Ratio	Dunedin	0.301437	0.122209	2.46656	0.0136976	0.0483516
	ApoA1 in HDL-4	ApoA1 in HDL-4	HDL	EDS_POS	-0.974305	0.235566	-4.13603	3.63142e-05	0.00410046
	ApoA1 in HDL-4	ApoA1 in HDL-4	HDL	Dunedin	-0.790624	0.132881	-5.94987	2.9962e-09	2.01345e-07
	ApoA1 in HDL-4	ApoA1 in HDL-4	HDL	Levine	-0.981214	0.299405	-3.27721	0.0010604	0.0254495
	ApoA2 in HDL-4	ApoA2 in HDL-4	HDL	Levine	-1.08833	0.29671	-3.668	0.00024873	0.0208933
	ApoA2 in HDL-4	ApoA2 in HDL-4	HDL	Dunedin	-0.859426	0.131495	-6.53579	7.41492e-11	1.24571e-08
	ApoA2 in HDL-4	ApoA2 in HDL-4	HDL	EDS_POS	-0.926104	0.233602	-3.96445	7.52922e-05	0.00505963
	CE in HDL-4	Cholesterol Esters in HDL-4	HDL	EDS_POS	-0.814738	0.231999	-3.51182	0.00045176	0.0126493
	CE in HDL-4	Cholesterol Esters in HDL-4	HDL	Levine	-0.964094	0.29413	-3.27778	0.00105847	0.0254495
	CE in HDL-4	Cholesterol Esters in HDL-4	HDL	Dunedin	-0.762125	0.130995	-5.81795	6.60065e-09	3.69636e-07
	CH in HDL-4	Cholesterol in HDL-4	HDL	EDS_POS	-0.874279	0.234886	-3.72214	0.000201204	0.00614586
	CH in HDL-4	Cholesterol in HDL-4	HDL	Dunedin	-0.759316	0.132303	-5.73924	1.04691e-08	4.39704e-07
	CH in HDL-4	Cholesterol in HDL-4	HDL	Levine	-0.958816	0.298235	-3.21497	0.00131855	0.0295355
	FC in HDL-4	Free Cholesterol in HDL-4	HDL	EDS_POS	-0.717002	0.220594	-3.25032	0.00116572	0.023111
	FC in HDL-4	Free Cholesterol in HDL-4	HDL	Dunedin	-0.62445	0.124817	-5.00292	5.97841e-07	2.23194e-05
	FC in HDL-4/Total lipid in HDL-4	Free Cholesterol in HDL-4/Total lipid (Phospholipids, Free Cholesterol, Triglycerides, Cholesterol) in HDL-4	Ratio	Dunedin	-0.312453	0.111925	-2.79162	0.00527834	0.0261732
	Total lipid in HDL-4	Total lipid (Phospholipids, Free Cholesterol, Triglycerides, Cholesterol) in HDL-4	HDL	EDS_POS	-0.994823	0.23614	-4.21285	2.59732e-05	0.00410046
	Total lipid in HDL-4	Total lipid (Phospholipids, Free Cholesterol, Triglycerides, Cholesterol) in HDL-4	HDL	Dunedin	-0.879488	0.132899	-6.61772	4.31657e-11	1.24571e-08
	Total lipid in HDL-4	Total lipid (Phospholipids, Free Cholesterol, Triglycerides, Cholesterol) in HDL-4	HDL	Levine	-1.07247	0.30036	-3.57063	0.000361813	0.0217882
	PL in HDL-4	Phospholipids in HDL-4	HDL	Dunedin	-0.811071	0.132124	-6.13873	9.42282e-10	7.91517e-08
	PL in HDL-4	Phospholipids in HDL-4	HDL	EDS_POS	-0.969847	0.234594	-4.13416	3.66112e-05	0.00410046
	PL in HDL-4	Phospholipids in HDL-4	HDL	Levine	-1.04603	0.297973	-3.51049	0.000453921	0.0217882
	TG in HDL-4	Triglycerides in HDL-4	HDL	Dunedin	-0.435367	0.125041	-3.4818	0.000505215	0.00413327
	Histidine	Histidine	Others	Dunedin	-0.386478	0.133079	-2.90413	0.00370991	0.0197862
	CH in IDL	Cholesterol in IDL	IDL	Dunedin	-0.316915	0.123551	-2.56506	0.0103646	0.0422546
	FC in IDL	Free Cholesterol in IDL	IDL	Dunedin	-0.355622	0.123626	-2.8766	0.00404841	0.0209272
	CE in IDL/Total lipid in IDL	Cholesterol Esters in IDL/Total lipid (Phospholipids, Free Cholesterol, Triglycerides, Cholesterol) in IDL	Ratio	Dunedin	0.46193	0.127938	3.61058	0.000310569	0.00282602
	CH in IDL/Total lipid in IDL	Cholesterol in IDL/Total lipid (Phospholipids, Free Cholesterol, Triglycerides, Cholesterol) in IDL	Ratio	Dunedin	0.42519	0.12732	3.33955	0.000849505	0.00607306
	IDL/Total lipid	IDL/Total lipid (Phospholipids, Free Cholesterol, Triglycerides, Cholesterol)	IDL	Dunedin	-0.355762	0.121385	-2.93086	0.00340601	0.0184871
	PL in ILDL	Phospholipids in ILDL	IDL	EDS_POS	-0.587542	0.216686	-2.71149	0.00673671	0.0371071
	PL in ILDL	Phospholipids in ILDL	IDL	Dunedin	-0.520729	0.12244	-4.25293	2.17493e-05	0.000429868
	ApoB in LDL	ApoB in LDL	LDL	EDS_POS	-0.64149	0.222654	-2.88111	0.00399127	0.0293204
	CE in LDL	Cholesterol Esters in LDL	LDL	Dunedin	-0.379187	0.129399	-2.93038	0.00341131	0.0184871
	CE in LDL/Total lipid in LDL	Cholesterol Esters in LDL/Total lipid (Phospholipids, Free Cholesterol, Triglycerides, Cholesterol) in LDL	Ratio	Dunedin	-0.374042	0.129152	-2.89614	0.00380549	0.0199788
	LDL-C	LDL Cholesterol	Percentage	Dunedin	-0.330993	0.129183	-2.56221	0.0104497	0.0422546
	CH in LDL/Total lipid in LDL	Cholesterol in LDL/Total lipid (Phospholipids, Free Cholesterol, Triglycerides, Cholesterol) in LDL	Ratio	Dunedin	-0.45605	0.132146	-3.45111	0.000566052	0.00432258
	CH/TG in LDL	Cholesterol/Triglycerides in LDL	Ratio	Dunedin	-0.495833	0.129176	-3.83842	0.0001264	0.00146449
	FC in LDL	Free Cholesterol in LDL	LDL	Dunedin	-0.310567	0.126067	-2.46351	0.0138147	0.0483516
	LDL/Total lipid	LDL/Total lipid (Phospholipids, Free Cholesterol, Triglycerides, Cholesterol)	LDL	EDS_POS	-0.672975	0.225277	-2.98732	0.00283741	0.0287227
	LDL/Total lipid	LDL/Total lipid (Phospholipids, Free Cholesterol, Triglycerides, Cholesterol)	LDL	Dunedin	-0.339233	0.127935	-2.6516	0.00805393	0.0360816
	PL in LDL	Phospholipids in LDL	LDL	Dunedin	-0.322712	0.128298	-2.51532	0.0119446	0.0451918
	PN in LDL	Particle Number in LDL	LDL	EDS_POS	-0.641013	0.222675	-2.87869	0.0040219	0.0293204
	TG in LDL/Total lipid in LDL	Triglycerides in LDL/Total lipid (Phospholipids, Free Cholesterol, Triglycerides, Cholesterol) in LDL	Ratio	Dunedin	0.473771	0.129922	3.64659	0.000270353	0.00267172
	CE in LDL-1	Cholesterol Esters in LDL-1	LDL	Dunedin	-0.39357	0.119196	-3.30186	0.000971802	0.00653051
	CE in LDL-1/Total lipid in LDL-1	Cholesterol Esters in LDL-1/Total lipid (Phospholipids, Free Cholesterol, Triglycerides, Cholesterol) in LDL-1	Ratio	Dunedin	-0.41563	0.1237	-3.35999	0.000789265	0.00584716
	CH in LDL-1	Cholesterol in LDL-1	LDL	Dunedin	-0.395656	0.120717	-3.27755	0.00105914	0.00684365
	CH in LDL-1/Total lipid in LDL-1	Cholesterol in LDL-1/Total lipid (Phospholipids, Free Cholesterol, Triglycerides, Cholesterol) in LDL-1	Ratio	Dunedin	-0.468072	0.129258	-3.62122	0.000298098	0.00282602
	CH/TG in LDL-1	Cholesterol/Triglycerides in LDL-1	Ratio	Dunedin	-0.334331	0.128449	-2.60284	0.00929276	0.0405502
	FC in LDL-1	Free Cholesterol in LDL-1	LDL	Dunedin	-0.368269	0.123808	-2.97451	0.00295808	0.0165653
	Total lipid in LDL-1	Total lipid (Phospholipids, Free Cholesterol, Triglycerides, Cholesterol) in LDL-1	LDL	Dunedin	-0.297487	0.120672	-2.46524	0.0137481	0.0483516
	PL in LDL-1	Phospholipids in LDL-1	LDL	Dunedin	-0.32872	0.119803	-2.74383	0.00610898	0.0292937
	LDL-1/LDL	LDL-1/LDL	Ratio	EDS_POS	0.669276	0.227213	2.94559	0.0032484	0.0287227
	TG in LDL-1/Total lipid in LDL-1	Triglycerides in LDL-1/Total lipid (Phospholipids, Free Cholesterol, Triglycerides, Cholesterol) in LDL-1	Ratio	Dunedin	0.320164	0.128046	2.50039	0.0124605	0.0461881
	TG in LDL-2/Total lipid in LDL-2	Triglycerides in LDL-2/Total lipid (Phospholipids, Free Cholesterol, Triglycerides, Cholesterol) in LDL-2	Ratio	Dunedin	0.321985	0.128847	2.49897	0.0125093	0.0461881
	CH in LDL-3/Total lipid in LDL-3	Cholesterol in LDL-3/Total lipid (Phospholipids, Free Cholesterol, Triglycerides, Cholesterol) in LDL-3	Ratio	Dunedin	-0.416265	0.125354	-3.32073	0.000909563	0.00636694
	CH/TG in LDL-3	Cholesterol/Triglycerides in LDL-3	Ratio	Dunedin	-0.444654	0.124994	-3.55741	0.000381033	0.00328275
	TG in LDL-3	Triglycerides in LDL-3	LDL	Dunedin	0.291281	0.118979	2.44818	0.0144168	0.0499388
	TG in LDL-3/Total lipid in LDL-3	Triglycerides in LDL-3/Total lipid (Phospholipids, Free Cholesterol, Triglycerides, Cholesterol) in LDL-3	Ratio	Dunedin	0.363202	0.118169	3.07357	0.00213481	0.0123917
	CH in LDL-4/Total lipid in LDL-4	Cholesterol in LDL-4/Total lipid (Phospholipids, Free Cholesterol, Triglycerides, Cholesterol) in LDL-4	Ratio	Dunedin	-0.402747	0.141311	-2.85007	0.00440548	0.0224279
	CH/TG in LDL-4	Cholesterol/Triglycerides in LDL-4	Ratio	Dunedin	-0.529092	0.143701	-3.68188	0.000236342	0.00240639
	TG in LDL-4/Total lipid in LDL-4	Triglycerides in LDL-4/Total lipid (Phospholipids, Free Cholesterol, Triglycerides, Cholesterol) in LDL-4	Ratio	Dunedin	0.608174	0.13111	4.63865	3.66715e-06	9.47818e-05
	TG in LDL-4/Total lipid in LDL-4	Triglycerides in LDL-4/Total lipid (Phospholipids, Free Cholesterol, Triglycerides, Cholesterol) in LDL-4	Ratio	EDS_POS	0.677707	0.231464	2.92791	0.0034399	0.0293204
	ApoB in LDL-5	ApoB in LDL-5	LDL	EDS_POS	-0.84677	0.226885	-3.73215	0.000193442	0.00614586
	CE in LDL-5	Cholesterol Esters in LDL-5	LDL	EDS_POS	-0.911966	0.226362	-4.0288	5.75051e-05	0.00483043
	CE in LDL-5/Total lipid in LDL-5	Cholesterol Esters in LDL-5/Total lipid (Phospholipids, Free Cholesterol, Triglycerides, Cholesterol) in LDL-5	Ratio	EDS_POS	-0.586352	0.218982	-2.67762	0.00745653	0.0404096
	CH in LDL-5	Cholesterol in LDL-5	LDL	EDS_POS	-0.877559	0.228223	-3.84517	0.000123034	0.00614586
	CH in LDL-5/Total lipid in LDL-5	Cholesterol in LDL-5/Total lipid (Phospholipids, Free Cholesterol, Triglycerides, Cholesterol) in LDL-5	Ratio	Dunedin	-0.40018	0.133715	-2.99278	0.00278765	0.0158754
	CH in LDL-5/Total lipid in LDL-5	Cholesterol in LDL-5/Total lipid (Phospholipids, Free Cholesterol, Triglycerides, Cholesterol) in LDL-5	Ratio	EDS_POS	-0.684748	0.236585	-2.8943	0.0038282	0.0293204
	CH/TG in LDL-5	Cholesterol/Triglycerides in LDL-5	Ratio	EDS_POS	-0.646998	0.233069	-2.776	0.00553852	0.0338353
	CH/TG in LDL-5	Cholesterol/Triglycerides in LDL-5	Ratio	Dunedin	-0.417211	0.131905	-3.16296	0.00157786	0.00981779
	FC in LDL-5	Free Cholesterol in LDL-5	LDL	EDS_POS	-0.880695	0.23012	-3.82711	0.000132372	0.00614586
	Total lipid in LDL-5	Total lipid (Phospholipids, Free Cholesterol, Triglycerides, Cholesterol) in LDL-5	LDL	EDS_POS	-0.75398	0.228002	-3.3069	0.000954621	0.023111
	PL in LDL-5	Phospholipids in LDL-5	LDL	EDS_POS	-0.851162	0.228424	-3.72623	0.000198033	0.00614586
	PN in LDL-5	Particle Number in LDL-5	LDL	EDS_POS	-0.847025	0.226886	-3.73327	0.000192586	0.00614586
	LDL-5/LDL	LDL-5/LDL	Ratio	EDS_POS	-0.647383	0.226038	-2.86404	0.00421234	0.0293204
	TG in LDL-5/Total lipid in LDL-5	Triglycerides in LDL-5/Total lipid (Phospholipids, Free Cholesterol, Triglycerides, Cholesterol) in LDL-5	Ratio	Dunedin	0.406322	0.130439	3.11503	0.00185696	0.0113444
	ApoB in LDL-6	ApoB in LDL-6	LDL	EDS_POS	-0.644053	0.218399	-2.94897	0.00321318	0.0287227
	CE in LDL-6	Cholesterol Esters in LDL-6	LDL	EDS_POS	-0.640865	0.219334	-2.92186	0.00350579	0.0293204
	CH in LDL-6	Cholesterol in LDL-6	LDL	EDS_POS	-0.656093	0.222722	-2.94579	0.00324639	0.0287227
	CH/TG in LDL-6	Cholesterol/Triglycerides in LDL-6	Ratio	Dunedin	-0.540736	0.133961	-4.0365	5.56252e-05	0.000747603
	FC in LDL-6	Free Cholesterol in LDL-6	LDL	EDS_POS	-0.733075	0.232097	-3.15848	0.00160189	0.023111
	Total lipid in LDL-6	Total lipid (Phospholipids, Free Cholesterol, Triglycerides, Cholesterol) in LDL-6	LDL	EDS_POS	-0.638624	0.221714	-2.88039	0.00400015	0.0293204
	PL in LDL-6	Phospholipids in LDL-6	LDL	EDS_POS	-0.7055	0.221533	-3.18463	0.00146437	0.023111
	PL in LDL-6/Total lipid in LDL-6	Phospholipids in LDL-6/Total lipid (Phospholipids, Free Cholesterol, Triglycerides, Cholesterol) in LDL-6	Ratio	Levine	-0.960121	0.279369	-3.43675	0.000596822	0.0223214
	PN in LDL-6	Particle Number in LDL-6	LDL	EDS_POS	-0.64408	0.218397	-2.94913	0.00321157	0.0287227
	TG in LDL-6/Total lipid in LDL-6	Triglycerides in LDL-6/Total lipid (Phospholipids, Free Cholesterol, Triglycerides, Cholesterol) in LDL-6	Ratio	Dunedin	0.539937	0.133112	4.05626	5.11443e-05	0.000741512
	LDL-C/HDL-C	LDL Cholesterol/HDL Cholesterol	Ratio	EDS_POS	-0.590705	0.213407	-2.76797	0.00567559	0.0340535
	MUFA/TFA	Monounsaturated fatty acid/Total fatty acid	Ratio	Dunedin	-0.377077	0.12271	-3.0729	0.00213904	0.0123917
	MUFA/PUFA	Monounsaturated fatty acid/Polyunsaturated fatty acid	Ratio	Dunedin	-0.392501	0.123279	-3.18385	0.00146835	0.00930876
	NAG1 NAG2 ratio	NAG1 NAG2 ratio	Ratio	Dunedin	-0.31815	0.11687	-2.72226	0.00652179	0.030435
	NAG1 NAG2 ratio	NAG1 NAG2 ratio	Ratio	EDS_POS	-0.598999	0.206695	-2.89798	0.00378343	0.0293204
	non-HDL-C	non-HDL Cholesterol	Percentage	EDS_POS	-0.658703	0.218706	-3.01182	0.00261881	0.0287227
	non-HDL-C	non-HDL Cholesterol	Percentage	Dunedin	-0.501017	0.123767	-4.04807	5.29652e-05	0.000741512
	non-HDL-C/CH	non-HDL Cholesterol/Cholesterol	Ratio	EDS_POS	-0.563992	0.201263	-2.80226	0.00510747	0.0329195
	(VLDL-C+IDL-C+LDL-C)/HDL-C	(VLDL Cholesterol+IDL Cholesterol+LDL Cholesterol)/HDL Cholesterol	Ratio	EDS_POS	-0.567139	0.198351	-2.85926	0.00427589	0.0293204
	Phenylalanine	Phenylalanine	Others	Dunedin	0.312529	0.121214	2.57833	0.0099756	0.0418975
	PL in IDL, VLDL, LDL, HDL	Phospholipids in IDL, VLDL, LDL, HDL	Percentage	Dunedin	-0.551691	0.126782	-4.35147	1.39796e-05	0.000293572
	SFA/TFA	Saturated fatty acid/Total fatty acid	Ratio	Dunedin	0.288035	0.11321	2.54426	0.0110011	0.0424872
	Trimethylamine-N-oxide	Trimethylamine-N-oxide	Others	Dunedin	0.378792	0.0978409	3.87151	0.00011054	0.00132648
	UFA/TFA	Unsaturated fatty acid/Total fatty acid	Ratio	Dunedin	-0.288035	0.11321	-2.54426	0.0110011	0.0424872
	UFA/PUFA	Unsaturated fatty acid/Polyunsaturated fatty acid	Ratio	Dunedin	-0.427211	0.122911	-3.47578	0.000516659	0.00413327
	CE in VLDL-2	Cholesterol Esters in VLDL-2	VLDL	Dunedin	-0.447353	0.126305	-3.54184	0.000403607	0.0033903
	CE in VLDL-2	Cholesterol Esters in VLDL-2	VLDL	EDS_POS	-0.590448	0.223687	-2.63962	0.00834436	0.0438079
	CE in VLDL-3	Cholesterol Esters in VLDL-3	VLDL	Dunedin	-0.337201	0.126287	-2.67011	0.00762407	0.0346174
	CE in VLDL-3	Cholesterol Esters in VLDL-3	VLDL	EDS_POS	-0.61212	0.223181	-2.74271	0.00613022	0.0349111
	PL in VLDL-3/Total lipid in VLDL-3	Phospholipids in VLDL-3/Total lipid (Phospholipids, Free Cholesterol, Triglycerides, Cholesterol) in VLDL-3	Ratio	EDS_POS	0.629341	0.203687	3.08974	0.00202178	0.0251599
	TG in VLDL-3	Triglycerides in VLDL-3	VLDL	EDS_POS	-0.604969	0.212894	-2.84164	0.00451879	0.0303662
	CH in VLDL-4/Total lipid in VLDL-4	Cholesterol in VLDL-4/Total lipid (Phospholipids, Free Cholesterol, Triglycerides, Cholesterol) in VLDL-4	Ratio	Dunedin	-0.321498	0.118727	-2.70787	0.00681037	0.0313464
	CH/TG in VLDL-4	Cholesterol/Triglycerides in VLDL-4	Ratio	Dunedin	-0.300683	0.117526	-2.55843	0.0105636	0.0422546
	CH in VLDL-5/Total lipid in VLDL-5	Cholesterol in VLDL-5/Total lipid (Phospholipids, Free Cholesterol, Triglycerides, Cholesterol) in VLDL-5	Ratio	Dunedin	-0.498907	0.128462	-3.88371	0.000105182	0.00130894
	CH/TG in VLDL-5	Cholesterol/Triglycerides in VLDL-5	Ratio	EDS_POS	-0.71193	0.234701	-3.03335	0.00244006	0.028271
	CH/TG in VLDL-5	Cholesterol/Triglycerides in VLDL-5	Ratio	Dunedin	-0.480131	0.132994	-3.61017	0.000311199	0.00282602
	TG in VLDL-5/Total lipid in VLDL-5	Triglycerides in VLDL-5/Total lipid (Phospholipids, Free Cholesterol, Triglycerides, Cholesterol) in VLDL-5	Ratio	Dunedin	0.364696	0.130694	2.79045	0.00529696	0.0261732
	TG in VLDL-5/Total lipid in VLDL-5	Triglycerides in VLDL-5/Total lipid (Phospholipids, Free Cholesterol, Triglycerides, Cholesterol) in VLDL-5	Ratio	EDS_POS	0.743281	0.231006	3.21758	0.00130664	0.023111
	PL in (VLDL+IDL)	Phospholipids in VLDL+Phospholipids in IDL	Percentage	EDS_POS	-0.55944	0.213706	-2.6178	0.00889534	0.0459821
	ApoB in (VLDL+IDL+LDL)	ApoB in VLDL+ApoB in IDL+ ApoB in LDL	Percentage	EDS_POS	-0.634946	0.215169	-2.95092	0.00319315	0.0287227
	CH in (VLDL+IDL+LDL)	Cholesterol in VLDL+Cholesterol in IDL+Cholesterol in LDL	Percentage	Dunedin	-0.521293	0.123508	-4.22072	2.50842e-05	0.000468238
	CH in (VLDL+IDL+LDL)	Cholesterol in VLDL+Cholesterol in IDL+Cholesterol in LDL	Percentage	EDS_POS	-0.708986	0.217763	-3.25576	0.0011436	0.023111
	FC in (VLDL+IDL+LDL)	Free Cholesterol in VLDL+Free Cholesterol in IDL+Free Cholesterol in LDL	Percentage	EDS_POS	-0.644626	0.211336	-3.05024	0.00230682	0.0276819
	FC in (VLDL+IDL+LDL)	Free Cholesterol in VLDL+Free Cholesterol in IDL+Free Cholesterol in LDL	Percentage	Dunedin	-0.476679	0.119722	-3.98155	7.01143e-05	0.000906093
	PL in (VLDL+IDL)	Phospholipids in VLDL+Phospholipids in IDL	Percentage	EDS_POS	-0.686333	0.213479	-3.21499	0.00131853	0.023111
	PL in (VLDL+IDL)	Phospholipids in VLDL+Phospholipids in IDL	Percentage	Dunedin	-0.490279	0.12107	-4.04957	5.26287e-05	0.000741512
	VLDL+IDL+LDL	VLDL+IDL+LDL	Percentage	EDS_POS	-0.634843	0.215168	-2.95045	0.00319803	0.0287227
	(VLDL-C+LDL-C)/HDL-C	(VLDL Cholesterol+LDL Cholesterol)/HDL Cholesterol	Ratio	EDS_POS	-0.625513	0.199142	-3.14105	0.00170001	0.023111
